# Supplementary material for: Helicobacter pylori virulence factors: relationship between genetic variability and phylogeographic origin
Source: PeerJ journal article supplement (doi:10.7717/peerj.12272), 2021-11-26

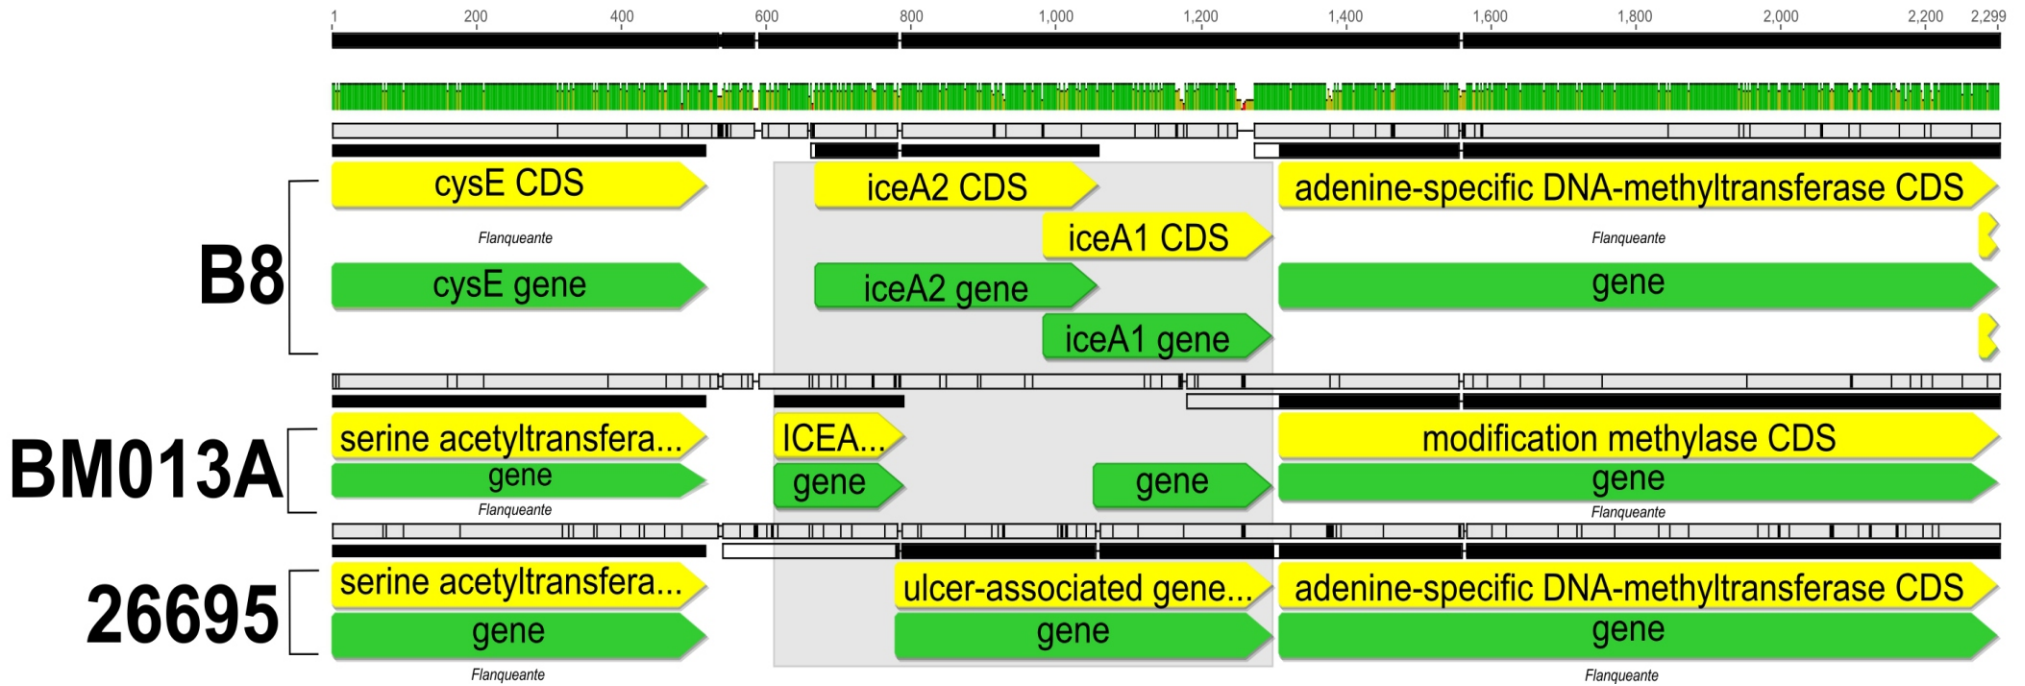

Supplement: Figure_S1.pdf [file Figure_S1.pdf]
