# Supplementary material for: Helicobacter pylori virulence factors: relationship between genetic variability and phylogeographic origin
Source: PeerJ. 2021 Nov 26;9:e12272. doi: 10.7717/peerj.12272 (PMC8628625; doi:10.7717/peerj.12272)
Supplement: Supplemental Information 2 — Phylogenetic tree obtained using GRIMM program. All ancestral orders (A60 to A117) shown in each node in the phylogeny. The number preceded by the plus symbol (+) indicates the number of inversions in each branch. Colored circles show the phylogeographic origin and colored triangles show the pathogenic phenotype. [file peerj-09-12272-s002.pdf]

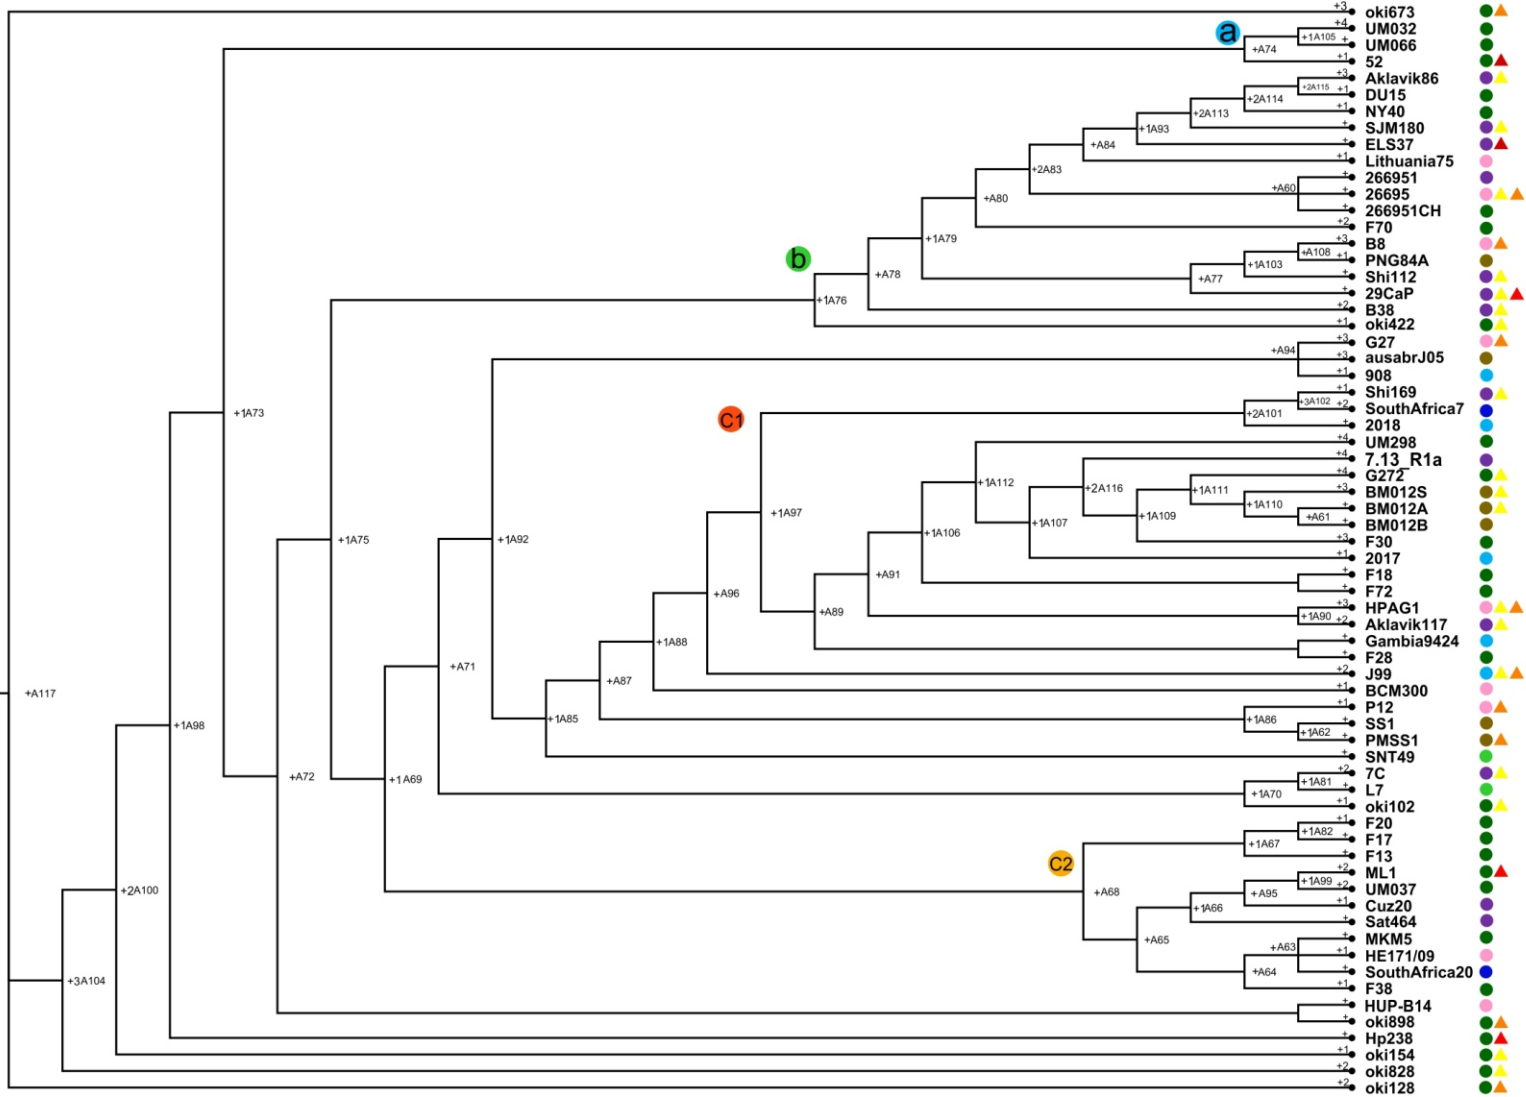

| PHYLOGEOGRAPHIC ORIGIN | PATHOGENIC PHENOTYPE   |
|------------------------|------------------------|
| HpEurope               | Gastritis              |
| HpAsia2                | Peptic Ulcer           |
| hspEAsia               | Gastric Lymphoma       |
| hspAmerind             | Gastric Adenocarcinoma |
| HpAfrica2              |                        |
| hspWAfrica             |                        |
| hspSAfrica             |                        |
| HpSahul                |                        |

3.0
