# Supplementary material for: Helicobacter pylori virulence factors: relationship between genetic variability and phylogeographic origin
Source: PeerJ. 2021 Nov 26;9:e12272. doi: 10.7717/peerj.12272 (PMC8628625; doi:10.7717/peerj.12272)
Supplement: Supplemental Information 4 — Coordinates and annotation errors are indicated for each gene per strain. The NCBI database ID is indicated for each genome analyzed [file peerj-09-12272-s004.xlsx]

## Sheet: VF list
Virulence Factors (VFs)	Gene name	BM013A	BM012B	BM013B	Hp238	26695-1MET	29CaP	7C	L7	DU15	CC33C	ausabrJ05	K26A1	PNG84A	G272	HPJP26	dRdM1	26695-dRdM1dM2	26695-dR	26695-dRdM2	7.13_R1c	7.13_R3a	7.13_R2b	7.13_R1a	dRdM2addM2	HE171/09	HE143/09	HE178/09	HE132/09	HE134/09	HE141/09	HE136/09	HE101/09	HE142/09	HE170/09	HE147/09	BCM-300	HE93/10_v1	MKM5	F28	F38	F63	F51	F78	F13	F17	F18	F209	F20
UREASE	ureA	(-72270-71554) Urease subunit alpha	(-402185-401469) Urease subunit alpha	(-72267-71551) Urease subunit alpha	(-92064-91348) Urease subunit alpha	(-77956-77240) Urease subunit alpha	(-74172-73456) Urease subunit alpha	(-72750-72034) Urease subunit alpha	(-66633-65917) Urease subunit alpha	(+1273286-1274002) Urease subunit alpha	(-125979-125263) Urease subunit alpha	DELETION/pseudo (-72240-71778) hypothetical protein; disrupted; no sequence	(-76941-76225) Urease subunit alpha	(-46374-45658) Urease subunit alpha	(+1405184-1405900) Urease subunit alpha	(-101884-101393)	(-77891-77175) urease subunit alpha	(-77890-77174) urease subunit alpha	(-77891-77175) urease subunit alpha	(-77884-77168) urease subunit alpha	(+1463876-1464592) urease subunit alpha	(+1463887-1464603) urease subunit alpha	(+1463893-1464609) urease subunit alpha	(+1463884-1464600) urease subunit alpha	(-77901-77185) urease subunit alpha	(-77726-77235)	(-77721-77230)	(-77724-77233)	(-77727-77236)	(-77724-77233)	(-77722-77231)	(-77726-77235)	(-77721-77230)	(-77740-77249)	(-77723-77232)	(-77738-77247)	(-77948-77232)	(-1164565-1164074)	(-88307-87591) urease subunit alpha	(-89716-89000) urease subunit alpha	(-91038-90322) urease subunit alpha	(-88576-87860) urease subunit alpha	(-83003-82287) urease subunit alpha	(-92495-91779) urease subunit alpha	(-92197-91481) urease subunit alpha	(-88040-87324) urease subunit alpha	(-82168-81452) urease subunit alpha	(-95181-94465) urease subunit alpha	(-95311-94595) urease subunit alpha
	ureB	(-71550-69841) urease subunit alpha	(-401465-399756) urease subunit alpha	(-71547-69838) ureC urease subunit alpha	(-91344-89635) ureC urease subunit alpha	(-77236-75527) ureC urease subunit alpha	(-73452-71743) ureC urease subunit alpha	(-72030-70321) ureC urease subunit alpha	(-65913-64204) ureC urease subunit alpha	(+1274006-1275715) ureC urease subunit alpha	(-125259-123550) ureC urease subunit alpha	(-71774-70065) ureC urease subunit alpha	(-76221-74512) ureC urease subunit alpha	(-45654-43945) ureC urease subunit alpha	(+1405904-1407613) urease subunit alpha	(-101389-99680)	(-77171-75462) urease subunit beta	(-77170-75461) urease subunit beta	(-77171-75462) urease subunit beta	(-77164-75455) urease subunit beta	(+1464596-1466305) urease subunit alpha	(+1464607-1466316) urease subunit alpha	(+1464613-1466322) urease subunit alpha	(+1464604-1466313) urease subunit alpha	(-77181-75472) urease subunit beta	(-77231-75522)	(-77226-75517)	(-77229-75520)	(-77232-75523)	(-77229-75520)	(-77227-75518)	(-77231-75522)	(-77226-75517)	(-77245-75536)	(-77228-75519)	(-77243-75534)	(-77228-75519)	(-1164070-1162361)	(-87587-85878)	(-88996-87287)	(-90318-88609)	(-87856-86147)	(-82283-80574)	(-91775-90066)	(-91477-89768)	(-87320-85611)	(-81448-79739)	(-94461-92752)	(-94591-92882)
	ureI	(-69647-69060) acid-activated urea channel	(-399569-398982) acid-activated urea channel	(-69644-69057) acid-activated urea channel	(-89443-88856) acid-activated urea channel	(-75334-74747) acid-activated urea channel	(-71549-70962) acid-activated urea channel	(-70097-69510) acid-activated urea channel	(-64016-63429) acid-activated urea channel	(+1275908-1276495) acid-activated urea channel	(-123358-122771) acid-activated urea channel	(-69872-69285) acid-activated urea channel	(-74321-73734) acid-activated urea channel	(-43753-43166) acid-activated urea channel	(+1407806-1408393) acid-activated urea channel	(-99487-98900)	(-75269-74682) acid-activated urea channel	(-75268-74681) acid-activated urea channel	(-75269-74682) acid-activated urea channel	(-75262-74675) acid-activated urea channel	(+1466498-1467085) acid-activated urea channel	(+1466509-1467096) acid-activated urea channel	(+1466515-1467102) acid-activated urea channel	(+1466506-1467093) acid-activated urea channel	(-75279-74692) acid-activated urea channel	(-75212-74625)	(-75207-74620)	(-75211-74624)	(-75213-74626)	(-75210-74623)	(-75208-74621)	(-75212-74625)	(-75207-74620)	(-75226-74639)	(-75209-74622)	(-75224-74637)	(-75209-74622)	(-1162051-1161464)	(-85686-85099)	(-87095-86508)	(-88416-87829)	(-85952-85365)	(-80382-79795)	(-89873-89286)	(-89574-88987)	(-85418-84831)	(-79546-78959)	(-92560-91973)	(-92690-92103)
	ureE	(-69058-68546)	(-398980-398468)	(-69055-68543)	(-88854-88342)	(-74745-74233)	(-70960-70448)	(-69508-68996)	(-63427-62915)	(+1276497-1277009)	(-122769-122257)	(-69283-68771)	(-73732-73220)	(-43164-42652)	(+1408395-1408907)	(-98898-98386)	(-74680-74168)	(-74679-74167)	(-74680-74168)	(-74673-74161)	(+1467087-1467599)	(+1467098-1467610)	(+1467104-1467616)	(+1467095-1467607)	(-74690-74178)	(-74623-74111)	(-74618-74106)	(-74622-74110)	(-74624-74112)	(-74621-74109)	(-74619-74107)	(-74623-74111)	(-74618-74106)	(-74637-74125)	(-74620-74108)	(-74635-74123)	(-74620-74108)	(-1161462-1160950)	(-85079-84585)	(-86506-85994)	(-87827-87315)	(-85363-84851)	(-79793-79281)	(-89284-88772)	(-88985-88473)	(-84811-84317)	(-78957-78445)	(-91953-91459)	(-92083-91589)
	ureF	(-68534-67770)	(-398456-397692)	(-68531-67767)	(-88312-87566)	(-74192-73446)	(-70424-69660)	(-68984-68220)	(-62885-62139)	(+1277039-1277791)	(-122227-121481)	(-68741-67986)	(-73197-72451)	(-42622-41867)	(+1408919-1409683)	(-98375-97611)	(-74145-73381)	(-74144-73380)	(-74145-73381)	(-74138-73374)	(+1467611-1468375)	(+1467622-1468386)	(+1467628-1468392)	(+1467619-1468383)	(-74155-73391)	(-74093-73333)	(-74088-73328)	(-74092-73332)	(-74094-73334)	(-74091-73331)	(-74089-73329)	(-74093-73333)	(-74088-73328)	(-74107-73347)	(-74090-73330)	(-74105-73345)	(-74076-73330)	(-1160932-1160172)	(-84555-83809)	(-85965-85213)	(-87286-86540)	(-84821-84069)	(-79251-78499)	(-88743-87991)	(-88441-87695)	(-84287-83541)	(-78415-77663)	(-91429-90683)	(-91559-90807)
	ureG	(-67741-67142)	(-397663-397064)	(-67738-67139)	(-87537-86938)	(-73417-72818)	(-69631-69032)	(-68191-67592)	(-62102-61503)	(+1277820-1278419)	(-121452-120853)	(-67957-67358)	(-72420-71821)	(-41838-41239)	(+1409712-1410311)	(-97582-96983)	(-73352-72753)	(-73351-72752)	(-73352-72753)	(-73345-72746)	(+1468404-1469003)	(+1468415-1469014)	(+1468421-1469020)	(+1468412-1469011)	(-73362-72763)	(-73304-72705)	(-73299-72700)	(-73303-72704)	(-73305-72706)	(-73302-72703)	(-73300-72701)	(-73304-72705)	(-73299-72700)	(-73318-72719)	(-73301-72702)	(-73316-72717)	(-73301-72702)	(-1160143-1159544)	(-83781-83182)	(-85184-84585)	(-86511-85912)	(-84040-83441)	(-78470-77871)	(-87962-87363)	(-87666-87067)	(-83512-82913)	(-77634-77035)	(-90654-90055)	(-90778-90179)
	ureH	(-67142-66345) UreH	(-397064-396267) UreH	(-67139-66342) UreH	(-86938-86141) UreH	(-72818-72021) UreH	(-69032-68235) UreH	(-67592-66795) UreH	(-61503-60706) UreH	(+1278419-1279204) UreH	(-120853-120056) UreH	(-67358-66573) UreH	(-71821-71039) UreH	(-41239-40442) UreH	(+1410311-1411096) anotada urease accesory protein	(-96983-96188)	(-72753-71956) UreH	(-72752-71955) UreH	(-72753-71956) UreH	(-72746-71949) UreH	(+1469003-1469800) urease accesory protein	(+1469014-1469811) urease accessory protein	(+1469020-1469817) urease accessory protein	(+1469011-1469808) urease accessory protein	(-72763-71966) UreH	(-72705-71908)	(-72700-71903)	(-72704-71907)	(-72706-71909)	(-72703-71906)	(-72701-71904)	(-72705-71908)	(-72700-71903)	(-72719-71922)	(-72702-71905)	(-72717-71920)	(-72702-71905) UreH	(-1159544-1158747)	(-83182-82385) UreH	(-84585-83800) UreH	(-85912-85127) UreH	(-83441-82644) UreH	(-77871-77074) UreH	(-87363-86578) UreH	(-87067-86270) UreH	(-82913-82116) UreH	(-77035-76238) UreH	(-90055-89258) UreH	(-90179-89394) UreH
ADHESINS	alpA/hopC	(+879540-881093) membrane protein	(-756928-755372) membrane protein	(+879538-881091) membrane protein	(+950392-951939) membrane protein	(+964802-966349) membrane protein	(+903099-904643) hypothetical protein	(+891702-893255) hypothetical protein	(+896964-898511) membrane protein	(-380960-379413) membrane protein	(+979662-981209) membrane protein	(+854964-856502) membrane protein	(+897204-898766) membrane protein	(+855899-857446) membrane protein	(-556158-554611) hypothetical protein	(+951545-953092)	(+967099-968646) outer membrane protein	(+965185-966732) outer membrane protein	(+965230-966777) outer membrane protein	(+965230-966777) outer membrane protein	(-612994-611471) outer membrane protein	(-613004-611481) outer membrane protein	(-613008-611485) outer membrane protein	(-613000-611477) outer membrane protein	(+965247-966794) outer membrane protein	(+979280-980830)	(+979528-981078)	(+979552-981102)	(+979783-981333)	(+979552-981102)	(+981969-983519)	(+979576-981126)	(+979537-981087)	(+979575-981125)	(-981951-983501)	(+979554-981104)	(+979548-981098) outer membrane protein HopC	(+398465-400015)	(+956532-958082)	(+966103-967650) outer membrane protein HopC	(+974251-975804)	(+946787-948334) outer membrane protein HopC	(+929775-931313)	(+966732-968282)	(+951245-952792) outer membrane protein HopC	(-378061-376508) outer membrane protein HopC	(+955794-957338) outer membrane protein HopC	(+946307-947860)	(-386302-384749)
	alpB/hopB	(+881115-882710) membrane protein	(-755350-753758) membrane protein	(+881113-882708) membrane protein	(+951961-953553) membrane protein	(+966371-967960) membrane protein	(+904665-906251) hypothetical protein	(+893277-894857) hypothetical protein	(+898533-900122) membrane protein	(-379391-377796) membrane protein	(+981231-982823) membrane protein	(+856524-858092) membrane protein	(+898788-900374) membrane protein	(+857468-859051) membrane protein	(-554589-553009) hypothetical protein	(+953115-954698)	(+968668-970257) outer membrane protein	(+966754-968343) outer membrane protein	(+966799-968388) outer membrane protein	(+966799-968388) outer membrane protein	(-611449-609854) outer membrane protein	(-611459-609864) outer membrane protein	(-611463-609868) outer membrane protein	(-611455-609860) outer membrane protein	(+966816-968405) outer membrane protein	(+980852-982435)	(+981100-982683)	(+981124-982707)	(+981355-982938)	(+981124-982707)	(+983541-985124)	(+981148-982731)	(+981109-982692)	(+981147-982730)	(+983523-985106)	(+981126-982709)	(+981165-982703) outer membrane protein HopB	(+400037-401620)	(+958149-959684) outer membrane protein HopB	(+967717-969267) outer membrane protein HopB	(+975871-977424) outer membrane protein HopB	(+948401-949933) outer membrane protein HopB	(+931380-932921) outer membrane protein HopB	(+968349-969881)	(+952859-954394) outer membrane protein HopB	(-376441-374900) outer membrane protein HopB	(+957405-958937) outer membrane protein HopB	(+947927-949468) outer membrane protein HopB	(-384682-383144) outer membrane protein HopB
	babA/hopS	(-863957-862104) membrane protein	(-655904-653673) membrane protein	(-863955-862102) membrane protein	(-934945-932720) membrane protein	(-1319606-1317405) membrane protein	(-1286309-1284084) hypothetical protein	DELETION/pseudo (-876004-873777) hypothetical protein no sequence	DELETION/pseudo (-881632-879911) membrane protein no tiene secuencia	DELETION/pseudo (+397038-398411) membrane protein no tiene secuencia	(-963343-961121) membrane protein	(-841258-839015) gbk membrane protein (-841202-839019) blastn identity 85%	DELETION/pseudo (-881014-879452) hypothetical protein no tiene secuencia id 81%	(-1162073-1159830) membrane protein	(+571798-574023) hypothetical protein	(-936053-933888)	(-1323925-1321724) outer membrane beta-barrel protein	(-1320030-1317829) outer membrane beta-barrel protein	(-1320087-1317886) outer membrane beta-barrel protein	(-1320081-1317880) outer membrane beta-barrel protein	(+210953-213148) blast identity 99% gbk hypothetical protein	(+210961-213156) gbk hypothetical protein blastn identity 99%	(+210967-213162) gbk hypothetical protein blastn identity 99%	(+210959-213154) gbk hypothetical protein blastn identity 99%	(-1322082-1319881) outer membrane beta-barrel protein	(-962776-960606)	(-963025-960855)	(-963049-960879)	(-963280-961110)	(-963049-960879)	(-965465-963295)	(-963073-960903)	(-963035-960865)	(-963073-960903)	(-965448-963278)	(-963052-960882)	(-963096-960871)	(-381964-379794)	(-940461-937561) babA (-940829-940440) babA (-1273591-1272797) babA	(-950407-948182) babA blastn id 87%	(-958571-958191) babA (-958261-955520) babA dividido por un grupo grande de gaps	(-931516-929294)	(-914018-911787)	(-951387-949171)	(-932933-932043) babA (-935558-933324) babA	(+393388-395613)	(-937550-936756) babA blastn 89% (-1283049-1282255) babA	(-930877-928661)	(+401659-403884)
	babB/hopT	(-1216970-1214889) membrane protein	(+342475-344556) membrane protein	(-1216956-1214875) membrane protein	(-1261226-1259100) membrane protein	(-949331-947205) membrane protein	(-887374-885188) hypothetical protein	(-327986-325857) hypothetical protein	DELETION/pseudo (-1204474-1202891) membrane protein no tiene secuencia	DELETION/pseudo (+77155-78420) membrane protein no tiene secuencia	(-1321269-1319188) membrane protein	DELETION/pseudo (-1163392-1162418) membrane protein no tiene secuencia id 90%	DELETION/pseudo (-879409-878152) membrane protein no tiene secuencia id 86%	DELETION/pseudo (-1158440-1157244) membrane protein no tiene secuencia	(+240376-242496) hypothetical protein	(-1267699-1265626)	(-951585-949504) hypothetical protein	(-949671-947590) hypothetical protein	(-949716-947635) hypothetical protein	(-949718-947637) hypothetical protein	DELETION (+212246-213148) blast identity 92%	DELETION (+212254-213156) blastn identity 92%	DELETION (+212260-213162) blastn identity 92%	DELETION (+212252-213154) blastn identity 92%	(-949733-947652) hypothetical protein	(-1224583-1222514)	(-1224789-1222720)	(-1224869-1222800)	(-1225131-1223062)	(-1224855-1222786)	(-1227353-1225284)	(-1224903-1222834)	(-1224854-1222785)	(-1224899-1222830)	(-1227277-1225208)	(-1224852-1222783)	(-1224863-1222782) outer membrane protein (omp19)	(-643785-641716)	(-1276013-1273878) outer membrane protein	(-1287405-1285285) outer membrane protein	(-1296331-1294205) outer membrane protein	(-1263252-1261132) outer membrane protein	(-1246746-1246746) outer membrane protein	(-1289239-1287116)	(-1270522-1268399) outer membrane protein	(-1253289-1251235) marcado like hopU and outer membrane protein	(-1285683-1283626) blastn id 93% pero no annotated as en gbk	(-1263542-1261422) outer membrane protein	(-1255413-1253332) outer membrane protein
	hpaA	(-769710-768928)blastn – neuraminyllactose-binding hemagglutinin (-477174-476338) HpaA (-994937-994188) 4-hydroxyphenylacetate catabolism regulator HpaA	(-1128383-1127601) blastn- neuraminyllactose-binding hemagglutinin (-794027-793191) HpaA (-1378120-1377371) 4-hydroxyphenylacetate catabolism regulator HpaA	(-769708-768926) blastn - neuraminyllactose-binding hemagglutinin (-477172-476336) HpaA (-994923-994174) 4-hydroxyphenylacetate catabolism regulator HpaA	(-839288-838506) blastn - neuraminyllactose-binding hemagglutinin (-1049607-1048858) 4-hydroxyphenylacetate catabolism regulator HpaA	(-854359-853577) blastn - neuraminyllactose-binding hemagglutinin (+423687-424436) 4-hydroxyphenylacetate catabolism regulator HpaA (-519292-518456) HpaA	(+569096-569878) blastn - neuraminyllactose-binding hemagglutinin (+864584-865417) HpaA (-1065871-1065122) 4-hydroxyphenylacetate catabolism regulator HpaA	(+554210-554992) blastn - neuraminyllactose-binding hemagglutinin (+851879-852715) HpaA (-1048985-1048236) 4-hydroxyphenylacetate catabolism regulator HpaA	(+530509-531291) blastn - neuraminyllactose-binding hemagglutinin (+862180-863022) HpaA (-998245-997496) 4-hydroxyphenylacetate catabolism regulator HpaA	(+488816-489598) blastn - neuraminyllactose-binding hemagglutinin (+288098-288871) 4-hydroxyphenylacetate catabolism regulator Hpa	(-868882-868100) blastn - neuraminyllactose-binding hemagglutinin (-1099271-1098522) 4-hydroxyphenylacetate catabolism regulator HpaA	(+820717-821559) annotated as hpaA (-954731-953982) 4-hydroxyphenylacetate catabolism regulator Hpa (+532965-533747) blastn- neuraminyllactose-binding hemagglutinin	(-783063-782281) blastn - neuraminyllactose-binding hemagglutinin (-481268-480414) HpaA (-994764-994015) 4-hydroxyphenylacetate catabolism regulator HpaA	(+515341-516123) blastn -neuraminyllactose-binding hemagglutinin (+837415-838257) HpaA (-949898-949149) 4-hydroxyphenylacetate catabolism regulator HpaA	(-929829-929047) blastn - neuraminyllactose-binding hemagglutinin (+455012-455761) 4-hydroxyphenylacetate catabolism regulator Hpa	(+587212-587994)	(-856654-855872) blastn- neuraminyllactose-binding hemagglutinin (+423795-424544) 4-hydroxyphenylacetate catabolism regulator HpaA	(-854748-853966) blastn- neuraminyllactose-binding hemagglutinin (+423783-424532) 4-hydroxyphenylacetate catabolism regulator HpaA	(-854786-854004) blastn- neuraminyllactose-binding hemagglutinin (+423790-424539) 4-hydroxyphenylacetate catabolism regulator HpaA	(-854785-854003) blatn- neuraminyllactose-binding hemagglutinin (+423787-424536) 4-hydroxyphenylacetate catabolism regulator HpaA	(-993190-992408) blastn - neuraminyllactose-binding hemagglutinin (+431304-432053) 4-hydroxyphenylacetate catabolism regulator HpaA	(-993201-992419) blastn - neuraminyllactose-binding hemagglutinin (+431314-432063) 4-hydroxyphenylacetate catabolism regulator HpaA	(-993205-992423) blastn - neuraminyllactose-binding hemagglutinin (+431318-432067) 4-hydroxyphenylacetate catabolism regulator HpaA	(-993197-992415) blastn- neuraminyllactose-binding hemagglutinin (+431310-432059) 4-hydroxyphenylacetate catabolism regulator HpaA	(-854800-854018) blastn - neuraminyllactose-binding hemagglutinin (+423804-424553) 4-hydroxyphenylacetate catabolism regulator HpaA	(-866812-866030)	(-867064-866282)	(-867088-866306)	(-867315-866533)	(-867085-866303)	(-869485-868703)	(-867109-866327)	(-867073-866291)	(-867109-866327)	(-869485-868703)	(-867091-866309)	(-519752-518913) hpaA (-867082-866300) blastn and gbk flagellar sheath adhesin hpaA (+1571596-1572345) hpaA1	(-286007-285225)	(+587233-588015) blastn and gbk - flagellar sheath adhesin hpaA (+917809-918570) adhesion HpaA2 (-1058032-1057283) neuraminyllactose-binding hemagglutinin HpaA	(-514928-514086) adhesion HpaA (-856878-856096) blastn and gbk- flagellar sheath adhesin hpaA (-1067533-1066784) neuraminyllactose-binding hemagglutinin HpaA	(-685446-684664) blastn and gbk -flagellar sheath adhesin hpaA (+936276-937118) adhesion HpaA2 (-1076218-1075469) neuraminyllactose-binding hemagglutinin HpaA	(+574669-575451) blastn and gbk -flagellar sheath adhesin hpaA (+908980-909822) adhesion HpaA2 (-1048322-1047573) neuraminyllactose-binding hemagglutinin HpaA	(-482458-481616) adhesion HpaA2 (-818101-817319) blastn and gbk -flagellar sheath adhesin hpaA (-1032889-1032140) neuraminyllactose-binding hemagglutinin HpaA	(+583084-583866) blastn and gbk– flagellar sheath adhesin hpaA (+929002-929844) adhesion HpaA2 (-1074660-1073911) neuraminyllactose-binding hemagglutinin HpaA	(+574724-575506) blastn and gbk - flagellar sheath adhesin hpaA (+912308-913063) adhesion HpaA2 (-1054408-1053659) neuraminyllactose-binding hemagglutinin HpaA	(+279340-280089) neuraminyllactose-binding hemagglutinin HpaA (-416466-415699) hpaA (-745239-745081) flagellar sheath adhesin hpaA (-745874-745248) blastn and gbk -flagellar sheath adhesin hpaA	(-501020-500178) adhesion HpaA2 (-845650-844868) blastn and gbk – flagellar sheath adhesin hpaA (-1063190-1062441) neuraminyllactose-binding hemagglutinin HpaA	(+581802-582584) blastn and gbk-flagellar sheath adhesin hpaA (+908386-909228) adhesion HpaA2 (-1047607-1046858) neuraminyllactose-binding hemagglutinin HpaA	(+285353-286102) neuraminyllactose-binding hemagglutinin HpaA (-423979-423218) adhesion HpaA2 (-752188-751406) blastn and gbk-flagellar sheath adhesin hpaA
	hopZ	(-7064-5064) membrane protein	(-7139-5226) membrane protein	(-7061-5064) membrane protein	(-7528-5525) membrane protein with BCM-300	(-7265-5241) membrane protein	(-7645-5756) hypothetical protein	(-7291-5393) hypothetical protein	(-2002-110) membrane protein	(-1537214-1535223) membrane protein	(-59964-57856) membrane protein	DELETION (-839919-839019) E value 3e-170 identity 75%	(-7262-5235) membrane protein	(+1317017-1319008) membrane protein	(+1490712-1492706) hypothetical protein	(-26150-24949)	(-7202-5178) outer membrane protein	(-7202-5178) outer membrane protein	(-7202-5178) outer membrane protein	(-7195-5171) outer membrane protein	DELETION/pseudo (+1584777-1586765) hypothetical protein incomplete; partial on complete genome no sequence	DELETION/pseudo (+1584788-1586776) hypothetical protein incomplete; partial on complete genome no sequence	DELETION/pseudo (+1584794-1586782) hypothetical protein incomplete; partial on complete genome no sequence	DELETION/pseudo (+1584785-1586773) hypothetical protein incomplete; partial on complete genome no sequence	(-7209-5185) outer membrane protein	(-8856-7624)	(-8854-7622)	(-8856-7624)	(-8856-7624)	(-8856-7624)	(-8856-7624)	(-8856-7624)	(-8856-7624)	(-8856-7624)	(-8856-7624)	(-8856-7624)	(-8502-7624)	(-1095710-1094478)	(-7387-5240) outer membrane protein	(-7292-5238) outer membrane protein	(-7279-5228) outer membrane protein	(-7347-5218) outer membrane protein	(-7533-5281) outer membrane protein	(-7241-5088) outer membrane protein	(-7082-5085) outer membrane protein	(-7368-5218) outer membrane protein	(-7410-5236) outer membrane protein	(-7293-5254) outer membrane protein	(-7311-5212) outer membrane protein
	horB	(+129388-130248) membrane protein	(+458920-459780) membrane protein	(+129388-130248) membrane protein	(+150351-151211) membrane protein	(+138358-139218) membrane protein	(+155378-156238) hypothetical protein	(+133287-134147) hypothetical protein	(+122084-122944) membrane protein	(+1193919-1194779) membrane protein	(+181996-182856) membrane protein	(+128412-129272) membrane protein	(+132874-133737) membrane protein	(+101854-102714) membrane protein	(-1347088-1346228) hypothetical protein	(-127370-126510)	(+138457-139317) outer membrane protein	(+138453-139313) outer membrane protein	(+138456-139316) outer membrane protein	(+138449-139309) outer membrane protein	(-1408069-1407209) outer membrane protein	(-1408079-1407219) outer membrane protein	(-1408086-1407226) outer membrane protein	(-1408076-1407216) outer membrane protein	(+138466-139326) outer membrane protein	(+135121-135981)	(+135115-135975)	(+135116-135976)	(+135122-135982)	(+135119-135979)	(-135118-135978)	(+135123-135983)	(+135113-135973)	(+135135-135995)	(+135118-135978)	(+135131-135991)	(+135117-135977) outer membrane protein 29	(+1221959-1222819)	(+146515-147375)	(+146556-147377)	(+147588-148409)	(-114152-113292) outer membrane protein HorB	(+137369-138229)	(-117571-116711)	(-117684-116824)	(-113262-112402)	(-107699-106839)	(-120242-119382)	(-120821-119961)
	sabA/hopP	(-699392-697440) gbk membrane protein (-699432-697444) blastn identity 93%	(-1055110-1053209) membrane protein	(-699390-697438) gbk membrane protein (-699430-697442) blastn identity 93%	(-765892-763907) gbk membrane protein (-765112-763907) blastn identity 83%	(-780543-778627) membrane protein	(+644505-646379) gbk hypothetical protein (+644387-646375) blastn identity 92%	(+627976-629922) gbk hypothetical protein (+627936-629918) blastn identity 94%	(+602858-604723) gbk membrane protein (+603530-604723) blastn identity 86%	(+562613-564511) gbk membrane protein (+562521-564507) blastn identity 90%	(+792502-794463) gbk membrane protein (+792459-794463) blastn identity 92%	(+607634-609580) gbk membrane protein (+607594-609579) blastn identity 89%	(-707378-705429) gbk membrane protein (-707420-705429) blastn identity 86%	(+589267-591216) gbk membrane protein (+589228-591212) blastn identity 89%	(-857173-855332) hypothetical protein	(+660295-662289) blastn identity 89%	(-782821-780905) outer membrane protein	(-780916-779000) outer membrane protein	(-780971-779055) outer membrane protein	(-780969-779053) outer membrane protein	(-919020-917113) gbk hypothetical protein (-919110-917113) blatn identity 100%	(-917124-919031) gbk hypothetical protein (-919121-917124) blastn identity 100%	(-919035-917128) gbk hypothetical protein (-919125-917128) blastn identity 100%	(-919027-917120) gbk (-919117-917120) blastn identity 100%	(-780985-779069) outer membrane protein	(+779939-781937)	(+780195-782193)	(+780213-782213)	(+780442-782442)	(+780213-782211)	(+782616-784612)	(+780233-782231)	(+780201-782199)	(+780236-782234)	(+782613-784611)	(+780220-782218)	(+780258-782213) putative Outer membrane protein	(+199136-201134)	(+660948-662900) identity 89%	(-784642-782690) identity 90%	(-612176-610230) identity 90%	(+647665-649617) identity 89%	(-745349-744195) identity 89%	(+656902-658779) identity 89%	(+649692-651641) identity 90%	(-672725-670770) identity 89%	(-771216-769267) gbk (-771255-769271) blastn identity 90%	(+656048-657925) gbk (+655930-657925) blastn identity 90%	(-677915-675966) gbk (-677954-675966) blastn identity 90%
	sabB/hopO	DELETION (-699341-697440) blastn identity 80%	(+1048720-1050585) membrane protein	DELETION (-699339-697438) blastn identity 80%	DELETION (-765121-763909) blastn identity 81%	(+774071-775960) membrane protein	DELETION (+644481-646379) blastn identity 81%	DELETION (+628027-629922) blastn identity 81%	DELETION (+603521-604719) blastn identity 84%	DELETION (+562613-564511) blastn numeros completos identity 81%	DELETION (+792557-794459) blastn identity 83%	DELETION (+607688-609578) blastn identity 79%	DELETION (-707330-705431) blastn identity 78%	DELETION (+589318-591216) blastn identity 80%	(+850818-852659) hypothetical protein	DELETION (+660384-662287) blastn identity 81%	(+776349-778238) outer membrane protein	(+774444-776333) outer membrane protein	(+774499-776388) outer membrane protein	(+774497-776386) outer membrane protein	DELETION (-919020-917117) blastn identity 82%	DELETION (-919031-917128) blastn identity 82%	DELETION (-919035-917132) blastn identity 82%	DELETION (-919027-917124) blastn identity 82%	(+774513-776402) outer membrane protein	(-786480-784610)	(-786736-784866)	(-786756-784886)	(-786985-785115)	(-786754-784884)	(-789155-787285)	(-786774-784904)	(-786742-784872)	(-786777-784907)	(-789154-787284)	(-786761-784891)	(-786855-784882)	(-205677-203807)	DELETION (+661002-662896) blastn identity 81%	DELETION (-784592-782692) blastn identity 80%	DELETION (-612125-610232) blastn identity 81%	DELETION (+647715-649615) blastn identity 80%	DELETION (-746093-744197) blastn identity 81%	DELETION (+656878 -658777) blastn identity 80%	DELETION(+649742-651639) blastn identity 81%	DELETION (-672671-670772) blastn identity 81%	DELETION (-771166-769267) blastn 81%	DELETION (+656024-657921) blastn identity 81%	DELETION (-677865-675968) blastn identity 81%
LEWIS ANTIGEN	futA	DELETION/pseudo (-616749-615419) fucosyltransferase; disrupted no sequence	(-1413026-1411668) gbk fucosyltransferase blastn identity 89%	DELETION/pseudo (-616747-615417) fucosyltransferase; disrupted no sequence	(+740367-741698) fucosyltransferase	(-697705-696275) gbk fucosyltransferase (-697705-696507) blastn identity 90%	DELETION (-1100708-1099540) blastn identity 90%	DELETION (-1083899-1082588) blastn identity 88%	DELETION (+684846-686179) blastn identity 85%	DELETION/pseudo (+1612911-1613738) gbk fucosyltransferase; disrupted no sequence (+1612952-1613747) blastn identity 87%	(-715216-714071) gbk fucosyltransferase (-715080-714122) blastn identity 93%	DELETION (-989593-988517) blastn identity 86%	(-1029522-1028437) blastn identity 88% (-1029522-1029409) gbk alpha-1,2-fucosyltransferase (-1028436-1029434) gen sin anotar estas son las coordenadas	DELETION (-984625-983479) blastn identity 82%	(-776414-775218) fucosyltransferase	(-1085748-1084411) id 86%	(-698010-696670) gbk fucosyltransferase (-698099-696902) blastn identity 90%	DELETION/pseudo (-697991-696652) gbk fucosyltransferase no sequence (-698080-696884 ) blastn identity 90%	(-698047-696707) gbk fucosyltransferase (-698136-696939) blastn identity 90%	(-698044-696704) gbk fucosyltransferase (-698133-696936) blastn identity 90%	DELETION/pseudo (-834061-832680) gbk fucosyltransferase no sequence (-834061-832870) blastn identity 91%	DELETION/pseudo (-834072-832691) gbk fucosyltransferase no sequence (-834072-832881) blastn identity 91%	DELETION/pseudo (-834076-832695) gbk fucosyltransferase no sequence (-834076-832695) blastn identity 91%	DELETION/pseudo (-834068-832687) fucosyltransferase no sequence (-834068-832877) blastn identity 91%	(-698060-696720) gbk fucosyltransferase (-698149-696952) blastn identity 90%	(+1536129-1537433) id 92%	(+1536335-1537639) id 92%	(+1536415-1537719) id 92%	(+1536682-1537986) id 92%	(+1536402-1537706) id 92%	(+1538903-1540207) id 92%	(+1536457-1537761) id 92%	(+1536321-1537624) id 92%	(+1536456-1537760) id 92%	(+1538824-1540128) id 92%	(+1536214-1537518) id 92%	(+1536404-1537708) alpha1,3-fucosyl transferase	(+955346-956650) id 92%	(-686082-685006) blastn identity 86% no annotated as pero si sale en blastn	(+760310-761678) alpha1,3-fucosyltransferase and fucosyltransferase (+760310-761676) blastn identity 83%	(+587655-588893) fucosyltransferase	(-1083197-1081872) fucosyltransferase	(-624116-622920) fucosyltransferase	(+754479-755720) fucosyltransferase	(+737370-738479) fucosyltransferase	DELETION (+244531-245776) blastn identity 83%	(-1099365-1098226) blastn identity 86% (-1099365- 1097972) fucosyltransferase (-1097972-1096821) fucosyltransferase divididos por gaps and sobrepuesto	(-1082392-1081154) fucosyltransferase	(+249872-251028) fucosyltransferase pero hay un grupo grande de gaps hasta (251.787) blastn identity 85%
	futB	(-1029698-1028538) fucosyltransferase	DELETION (-1413026-1411803) blastn identity 87%	(-1029684-1028524) fucosyltransferase	(-1084544-1083192) fucosyltransferase	DELETION (-697592-696275) blastn identity 88%	(-1100850-1099540) gbk fucosyltransferase (-1100850-1099686) blastn identity 91%	DELETION/pseudo (-1083899-1082588) gbk fucosyltransferase; disrupted no sequence (-1083789-1082724) blastn identity 90%	(+684846-686183) gbk fucosyltransferase (+684846-686056) blastn identity 86%	DELETION (+1612952-1613747) blastn numeros completos identity 86%	DELETION (-715216-714122) blastn identity 92%	(-989593-988373) gbk fucosyltransferase (-989593-988517) blastn identity 87%	DELETION/pseudo (-1029434-1028436) gbk fucosyltransferase; disrupted no sequence blastn identity 89%	(-984764-983487) gbk fucosyltransferase (-984764-983625) blastn identity 85%	(+420117-421490) fucosyltransferase	(+738731-740125) id 82%	DELETION (-697987-696670) blastn identity 88%	DELETION (-697968-696652) blastn identity 88%	DELETION (-698024-696707) blastn identity 88%	DELETION (-698021-696704) blastn identity 88%	DELETION (-834061-832680) blastn identity 89%	DELETION (-834072-832691) blastn identity 89%	DELETION (-834076-832695) blastn identity 89%	DELETION (-834068-832687) blastn identity 89%	DELETION (-698037-696720) blastn identity 88%	(-698002-696785) id 92%	(-698261-697044) id 92%	(-698276-697059) id 92%	(-698505-697288) id 92%	(-698277-697060) id 92%	(-700679-699462) id 92%	(-698293-697076) id 92%	(-698265-697048) id 92%	(-698299-697082) id 92%	(-700676-699459) id 92%	(-698283-697066) id 92%	(-698279-696936)	(-117200-115983) id 92%	(-1092930-1091431) fucosyltransferase solo que está dividido por gaps (-1092930-1091785) blastn identity 85%	(-1102350-1100935) fucosyltransferase (-1102350-1100936) blastn identity 84%	(-1111183-1109747) fucosyltransferase (-1111183-1110038) blastn identity 85% separados por gaps	(+725457-726872) fucosyltransferase id 92%	(-1067869-1066433) fucosyltransferase identity 85%	(-1109525-1108047) fucosyltransferase identity 80% separado por gaps	(-1089132-1087939) fucosyltransferase identity 85% separado por gaps	(+243399-245768) fucT alpha-(1,3)-fucosyltransferase id 84% divididos por dos grupos de gaps	(+744261-746986) fucosyltransferase dividido por dos grupos grandes de gaps (+744261-745406) blastn identity 84%	(-680320-678896) fucosyltransferase identity 84%	(-599649-598456) fucosyltransferase (-599726-598456) si puede ser blastn identity 83%
	futC	(-94032-93130) alpha-1,2-fucosyltransferase	(-423934-423033) blastn identity 94% (-423473-423033) alpha-1,2-fucosyltransferase (-423934-423470) alpha-1,2-fucosyltransferase	(-94029-93127) alpha-1,2-fucosyltransferase	(-113659-112764) blastn identity 93% (-113659-113201) alpha-1,2-fucosyltransferase (-113204-112764) alpha-1,2-fucosyltransferase	(-99840-98936) blastn identity 95% (-99376-98936) alpha-1,2-fucosyltransferase (-99840-99373) alpha-1,2-fucosyltransferase	(-95096-94200) blastn identity 95% (-94640-94200) alpha-1,2-fucosyltransferase with secuencia DELETION/pseudo (-95096-94637) alpha-1,2-fucosyltransferase; disrupted no sequence	(-94367-93465) blastn identity 96% (-93905-93465) alpha-1,2-fucosyltransferase with secuencia DELETION/pseudo (-94367-93902) alpha-1,2-fucosyltransferase; disrupted no sequence	(-87526-86623) blastn identity 95% (-87063-86623) alpha-1,2-fucosyltransferase (-87526-87110) alpha-1,2-fucosyltransferase son dos muy separadas	(-1157895-1156999) blastn identity 95% (-1157439-1156999) alpha-1,2-fucosyltransferase DELETION/pseudo (-1157895-1157436) alpha-1,2-fucosyltransferase; disrupted no sequence	(-146690-145790) blastn identity 97% (-146230-145790) alpha-1,2-fucosyltransferase (-146690-146268) alpha-1,2-fucosyltransferase son muy separados	(-93425-92531) blastn identity 92% (-92971-92531) alpha-1,2-fucosyltransferase DELETION/pseudo (-93425-92968) alpha-1,2-fucosyltransferase; disrupted no sequence	(-99024-98126) blastn identity 91% (-98566-98126) alpha-1,2-fucosyltransferase (-99024-98563) alpha-1,2-fucosyltransferase	(-67747-66858) blastn identity 93% (-67298-66858) alpha-1,2-fucosyltransferase (-67747-67295) alpha-1,2-fucosyltransferase	(+1381849-1382739) alpha-1,2-fucosyltransferase	(+162116-163006) id 93%	(-99774-98871) blastn identity 95% (-99311-98871) alpha-1,2-fucosyltransferase (-99774-99358) alpha-1,2-fucosyltransferase muy separados	(-99773-98870) blastn identity 95% (-99310-98870) alpha-1,2-fucosyltransferase (-99773-99357) alpha-1,2-fucosyltransferase muy separados	(-99774-98871) blastn identity 95% (-99311-98871) alpha-1,2-fucosyltransferase (-99774-99358) alpha-1,2-fucosyltransferase muy separados	(-99767-98864) blastn identity 95% (-99304-98864) alpha-1,2-fucosyltransferase (-99767-99351) alpha-1,2-fucosyltransferase muy separados	(+1443319-1444219) blastn identity 96% (+1443319-1443741) alpha-1,2-fucosyltransferase (+1443779-1444219) alpha-1,2-fucosyltransferase muy separados	(+1443330-1444230) blastn identity 96% (+1443330-1443752) alpha-1,2-fucosyltransferase (+1443790-1444230) alpha-1,2-fucosyltransferase muy separados	(+1443336-1444236) blastn identity 96% (+1443336-1443758) alpha-1,2-fucosyltransferase (+1443796-1444236) alpha-1,2-fucosyltransferase muy separados	(+1443327-1444227) blastn identity 96% (+1443327-1443749) alpha-1,2-fucosyltransferase (+1443787-1444227) alpha-1,2-fucosyltransferase muy separados	(-99784-98881) blastn identity 95% (-99321-98881) alpha-1,2-fucosyltransferase (-99784-99368) alpha-1,2-fucosyltransferase muy separados	(-99585-98685) id 96%	(-99579-98680) id 95%	(-99581-98683) id 95%	(-99585-98686) id 95%	(-99583-98683) id 96%	(-99581-98681) id 96%	(-99586-98685) id 96%	(-99577-98679) id 95%	(-99599-98699) id 96%	(-99582-98682) id 96%	(-99595-98697) id 95%	(-99581-98682) alpha-1,2-fucosyltransferase	(-1186423-1185524) id 95%	(-109525-108630) blastn identity 93% (-109525-109067) alpha-1,2-fucosyltransferase (-109070-108630) alpha-1,2-fucosyltransferase	(-111050-110158) blastn identity 93% (-110598-110158) alpha-1,2-fucosyltransferase (-111050-110595) alpha-1,2-fucosyltransferase	(-112407-111498) alpha-1,2-fucosyltransferase blastn identity 92% separado por gaps	(+149648-150553) alpha-1,2-fucosyltransferase blastn identity 85%	(-102057-101161) alpha-1,2-fucosyltransferase identity 92% separados por gaps	(+154097-154996) alpha-1,2-fucosyltransferase identity 92% separdo por gaps	(+153400-154308) alpha-1,2-fucosyltransferase blastn identity 92% separado por gaps	(-1162624-1161729) blastn identity 92% (-1162169-1161729) alpha-1,2-fucosyltransferase (-1162624-1162166) alpha-1,2-fucosyltransferase sobrepuestos	(+144445-145332) alpha-1,2-fucosyltransferase	(+156279-157175) alpha-1,2-fucosyltransferase identity 92%	(-1166192-1165291) blastn identity 93% (-1166192-1165728) alpha-1,2-fucosyltransferase (-1165731- 1165291) alpha-1,2-fucosyltransferase
IMMUNE MODULATOR	napA	(-244822-244388) DNA polymerase III subunit beta	(-574616-574182) DNA polymerase III subunit beta	(-244824-244390) DNA polymerase III subunit beta	(-267647-267213) DNA polymerase III subunit beta	(-252659-252225) DNA polymerase III subunit beta identity 100%	(-269535-269101) DNA starvation/stationary phase protection protein	(-245942-245508) DNA starvation/stationary phase protection protein	(-209190-208756) DNA polymerase III subunit beta	(+1037896-1038330) DNA polymerase III subunit beta	(-297787-297353) DNA polymerase III subunit beta	(-239664-239230) DNA polymerase III subunit beta	(-247094-246660) DNA polymerase III subunit beta	(-211734-211300) DNA polymerase III subunit beta	(+1229157-1229591) DNA starvation/stationary phase protection protein	(-282035-281601 ) id 96%	(-252758-252324) DNA starvation/stationary phase protection protein	(-252748-252314) DNA starvation/stationary phase protection protein	(-252754-252320) DNA starvation/stationary phase protection protein	(-252749-252315) DNA starvation/stationary phase protection protein	(+1295505-1295939) DNA starvation/stationary phase protection protein	(+1295514-1295948) DNA starvation/stationary phase protection protein	(+1295521-1295955) DNA starvation/stationary phase protection protein	(+1295512-1295946) DNA starvation/stationary phase protection protein	(-252767-252333) DNA starvation/stationary phase protection protein	(-249606-249172) id 95%	(-249598-249164) id 95%	(-249606-249172) id 95%	(-249826-249392) id 95%	(-249606-249172) id 95%	(-249605-249171) id 95%	(-249613-249179) id 95%	(-249595-249161) id 95%	(-249622-249188) id 95%	(-249605-249171) id 95%	(-249617-249183) id 95%	(-1159162-1158011) Na+/H+ antiporter (napA)	(-1336445-1336011) id 95%	(-260578-260144)	(-285368-284934)	(-286047-285613)	(-273015-272581)	(-250799-250365)	(-276884-276450)	(-273036-272602) neutrophil activating protein (napA)	(+1043087-1043521) neutrophil activating protein (napA)	(-268567-268133) neutrophil activating protein (napA)	(-279070-278636) neutrophil activating protein (napA)	(+132756-133907)
	oipA/hopH	(+602334-603305) membrane protein	(+958740-959663) membrane protein	(+602332-603303) membrane protein	(+670441-671355) membrane protein	(+684385-685302) membrane protein identity 100%	(-735051-734119) hypothetical protein	(-724161-723187) hypothetical protein	(-699228-698305) membrane protein	(+1602520-1603434) membrane protein	(+700827-701753) membrane protein	DELETION/pseudo (-696383-695882) membrane protein; disrupted no sequence	DELETION/pseudo (+611203-612155) membrane protein; disrupted no sequence	(-681296-680382) membrane protein	(+763426-764340) hypothetical protein	(+671458-672369) id 95%	(+684782-685699) outer inflammatory protein OipA	(+684765-685682) outer inflammatory protein OipA	(+684819-685736) outer inflammatory protein oipA	(+684816-685733) outer inflammatory protein OipA	(+819602-820531) outer inflammatory protein OipA	(+819613-820542) outer inflammatory protein OipA	(+819617-820546) outer inflammatory protein OipA	(+819609-820538) outer inflammatory protein OipA	(-684832-685749) outer inflammatory protein OipA	(+683422-684339) id 95%	(+683682-684599) id 95%	(+683696-684613) id 95%	(+683925-684842) id 95%	(+683697-684614) id 95%	(+686099-687016) id 95%	(+683713-684630) id 95%	(+683685-684602) id 95%	(+683719-684636) id 95%	(+686096-687013) id 95%	(+683703-684620) id 95%	(+683699-684616) outer membrane protein HopH	(+102620-103537) id 95%	(+672059-672973) HopH	(+675725-676570) hopH	(-600612-599767) hopH	(+658761-659675) hopH	(+611129-612043) hopH	(+667964-668878) outer membrane protein	(+660865-661710) hopH	(+577850-578764) outer membrane protein HopH	(+673651-674496) hopH	(+667101-668015) hopH	(+586659-587573) hopH
FLAGELLA GENES	flaA	(+553333-554865) annotated as flagellin B blastn identity 96%	(+911184-912716) annotated as flagellin B blastn id 96%	(+553331-554863) annotated as flagellin B id 96%	(+621639-623171) annotated as flagellin B id 97%	(+636893-638425) annotated as flagellin B id 97%	(-784068-782536) annotated as flagellin B id 96%	(-773191-771659) annotated as flagellin B id 97%	(-746435-744903) annotated as flagellin B id 96%	(-696147-694615) annotated as flagellin B id 96%	(+653117-654649) annotated as flagellin B id 98%	(-743645-742113) annotated as flagellin B id 96%	(+562715-564247) annotated as flagellin B id 94%	(-728346-726814) annotated as flagellin B id 95%	(+714825-716357) annotated as flagellin B id 96%	(-800343-798811) id 96%	(+637291-638823) id 97%	(+637274-638806) id 97%	(+637328-638860) id 97%	(+637325-638857) id 97%	(+770832-772364) annotated as flagellin B id 96%	(+770839-772371) annotated as flagellin B id 96%	(+770847-772379) annotated as flagellin B id 96%	(+770839-772371) annotated as flagellin B id 96%	(+637340-638872) id 97%	(+635622-637154) id 98%	(+635604-637136) id 98%	(+635616-637148) id 98%	(+635843-637375) id 98%	(+635621-637153) id 98%	(+638019-639551) id 98%	(+635633-637165) id 98%	(+635606-637138) id 98%	(+635638-637170) id 98%	(+638016-639548) id 98%	(+635624-637156) id 98%	(+635619-637151) blastn and gbk id 98% - flagellin A – flaA (+904232-905233) flagellar glycosylation protein flaA1	(+54540-56072) id 98%	(-804759-803227) blastn id 96%y gbk flagellin A (-550582-549599) flaA1 protein	(+627023-628555) flagellin A blastn id 95% (+893739-894722) flaA1 protein	(-823366-821834) flagellin A blastn id 96% (+720981-721964) flaA1 protein	(-796442-794910) flagellin A blastn id 96% (-538140-537157) flaA1 protein	(+562540-564072) flagellin A blastn id 96% (+855061-856065) flaA1 protein	(-816453-814921) flagellin A blastn id 96% (-545638-544655) flaA1 protein	(-799347-797815) flagellin A id 96% (-536742-535759) flaA1 protein	(+530543-532075) flagellin A blastn id 96%(+782561-783544) flaA1 protein	(+616077-617609) flagellin A blastn id 96% (+882043-883026) flaA1 protein	(-796271-794739) flagellin A blastn id 96% (-543845-542862) flaA1 protein	(+538047-539579) flagellin A id 96% (+790214-791197) flaA1 protein
	flaB	(-118544-117000) flagellin B blastn identity 96% en gbk	(-448276-446732) flagellin B	(-118544-117000) flagellin B id 96%	(-138125-136581) flagellin B id 96%	(-124492-122948) flagellin B id 96%	(-119609-118065) flagellin B id 97%	(-119082-117538) id 97%	(-111610-110066) id 95%	(-1181864-1180320) id 96%	(-171159-169615) id 95%	(-117922-116378) id 96%	(-122085-120541) id 93%	(-91783-90239) id 96%	(+1357865-1359409) id 96%	(-139745-138201) id 96%	(-124425-122881) id 96%	(-124423-122879) id 96%	(-124424-122880) id 96%	(-124417-122873) id 96%	(+1418834-1420378) id 96%	(+1418841-1420385) id 96%	(+1418851-1420395) id 96%	(+1418841-1420385) id 96%	(-124434-122890) id 96%	(+122787-124331) id 98%	(+122781-124325) id 98%	(+122782-124326) id 98%	(+122788-124332) id 98%	(+122785-124329) id 98%	(+122784-124328) id 98%	(+122789-124333) id 98%	(+122779-124323) id 98%	(+122801-124345) id 98%	(+122784-124328) id 98%	(+122797-124341) id 98%	(-124327-122783)	(+1209625-1211169) id 98%	(-133437-131893) id 96%	(-135542-133998) id 96%	(-136935-135391) id 96%	(+125022-126566) id 96%	(-126580-125036) id 96%	(+129481-131025) id 96%	(+129488-131032) id 96%	(-1186523-1184979) id 96%	(+119816-121360) id 96%	(+132261-133805) id 96%	(-1190085-1188541) id 96%
	flaG	(+329945-330487) flagellar protein FlaG (+724552-724911) flagellar protein FlaG id 95%	(+665027-665569) flagellar protein FlaG (+1079575-1079934) flagellar protein FlaG id 97%	(+329948-330490) flagellar protein FlaG (+724550-724909) flagellar protein FlaG id 95%	(+349126-349668) flagellar protein FlaG (+791081-791440) flagellar protein FlaG id 98%	(+343057-343599) flagellar protein FlaG blastn id 100% (+806084-806443) flagellar protein FlaG id 95%	(+358651-359193) UDP-4-amino-4,6-dideoxy-N-acetyl-beta-L-altrosamine N-acetyltransferase blastn identity 96% (-617029-616670) flagellar biosynthesis protein FlaG id 96%	(+337154-337696) blastn DP-4-amino-4,6-dideoxy-N-acetyl-beta-L-altrosamine N-acetyltransferase id 95% (-602490-602131) gbk flagellar biosynthesis protein FlaG id 95%	(+295946-296488) flagellar protein FlaG (-577773-577414) flagellar protein FlaG id 95%	(-951270-950728) flagellar protein FlaG (-537223-536864) flagellar protein FlaG id 98%	(+396038-396580) flagellar protein FlaG (+821179-821538) flagellar protein FlaG id 94%	(+325222-325764) flagellar protein FlaG (-582611-582252) flagellar protein FlaG id 96%	(+338956-339498) flagellar protein FlaG (+733092-733469) flagellar protein FlaG id 89%	(+298291-298833) flagellar protein FlaG (-563934-563575) flagellar protein FlaG id 96%	(-1147148-1146606) UDP-4-amino-4,6-dideoxy-N-acetyl-beta-L-altrosamine N-acetyltransferase blastn id 95% (+882705-883064) flagellar biosynthesis protein FlaG id 99%	(+370633-371175) id 95% (-634902-634543) id 92%	(+343164-343706) UDP-4-amino-4,6-dideoxy-N-acetyl-beta-L-altrosamine N-acetyltransferase blastn 100% (+808361-808720) gbk flagellar biosynthesis protein FlaG id 95%	(+343153-343695) UDP-4-amino-4,6-dideoxy-N-acetyl-beta-L-altrosamine N-acetyltransferase blastn id 100% (+806455-806814) gbk flagellar biosynthesis protein FlaG id 95%	(+343160-343702) UDP-4-amino-4,6-dideoxy-N-acetyl-beta-L-altrosamine N-acetyltransferase blastn id 100% (+806511-806870) gbk flagellar biosynthesis protein FlaG id 95%	(+343156-343698) UDP-4-amino-4,6-dideoxy-N-acetyl-beta-L-altrosamine N-acetyltransferase blastn id 100% (+806509-806868) gbk flagellar biosynthesis protein FlaG id 95%	(-1208881-1208339) UDP-4-amino-4,6-dideoxy-N-acetyl-beta-L-altrosamine N-acetyltransferase blastn id 94% (+944187-944546) gbk flagellar biosynthesis protein FlaG id 95%	(-1208888-1208346) pseH UDP-4-amino-4,6-dideoxy-N-acetyl-beta-L-altrosamine N-acetyltransferase blastn id 94% (+944198-944557) gbk flagellar biosynthesis protein FlaG id 95%	(-1208897-1208355) pseH UDP-4-amino-4,6-dideoxy-N-acetyl-beta-L-altrosamine N-acetyltransferase blastn id 94% (+944202-944561) gbk flagellar biosynthesis protein FlaG id 95%	(-1208888-1208346) pseH UDP-4-amino-4,6-dideoxy-N-acetyl-beta-L-altrosamine N-acetyltransferase blastn id 94% (+944194-944553) gbk flagellar biosynthesis protein FlaG id 95%	(+343173-343715) pseH UDP-4-amino-4,6-dideoxy-N-acetyl-beta-L-altrosamine N-acetyltransferase blastn id 100% (+806525-806884) gbk flagellar biosynthesis protein FlaG id 95%	(+338704-339246) id 94% (+811948-812319) id 100%	(+338694-339236) id 94% (+812202-812573) id 100%	(+338703-339245) id 94% (+812224-812595) id 100%	(+338924-339466) id 94% (+812451-812822) id 100%	(+338704-339246) id 94% (+812222-812593) id 100%	(+338702-339244) id 94% (+814621-814992) id 100%	(+338711-339253) id 94% (+812242-812613) id 100%	(+338693-339235) id 94% (+812209-812580) id 100%	(+338720-339262) id 94% (+812245-812616) id 100%	(+338702-339244) id 94% (+814621-814992) id 100%	(+338714-339256) id 94% (+812227-812598) id 100%	(+338704-339246) flagellar biosynthesis protein blastn id 94% (+812224-812595) flagellar protein FlaG id 92%	(+1425543-1426085) id 94% (+231144-231515) id 100%	(+347265-347807) blastn id 95% and gbk flagellar protein FlaG (-636484-636125) flagellar protein FlaG id 100%	(+371925-372467) flagellar protein FlaG (+809541-809900) flagellar protein FlaG id 97%	(+372597-373139) flagellar protein FlaG (+636859-637218) flagellar protein FlaG id 97%	(+359910-360452) flagellar protein FlaG blastn id 94% (-622256-621897) flagellar protein FlaG id 98%	(+339175-339717) flagellar protein FlaG (+770433-770792) flagellar protein FlaG id 98%	(+365602-366144) flagellar protein FlaG id 94% (-631492-631133) flagellar protein FlaG id 98%	(+354928-355470) flagellar protein FlaG blastn id 95% (-624393-624034) flagellar protein FlaG id 100%	(-961481-960939) flagellar protein FlaG(+697561-697920) flagellar protein FlaG id 98%	(+355449-355991) flagellar protein FlaG (+796684-797043) flagellar protein FlaG id 96%	(+363827-364369) flagellar protein FlaG id 94% (-631038-630679) flagellar protein FlaG id 98%	(-967779-967237) flagellar protein FlaG (+703076-703435) flagellar protein FlaG id 98%
	flgA	(-1422618-1421962) flagellar basal body P-ring biosynthesis protein FlgA id 95%	(-1522733-1522077) flagellar basal body P-ring biosynthesis protein FlgA	(-1422597-1421941) flagellar basal body P-ring biosynthesis protein FlgA	(-1441153-1440497) flagellar basal body P-ring biosynthesis protein FlgA	(-1549109-1548453) flagellar basal body P-ring biosynthesis protein FlgA	(-1523215-1522559) flagellar biosynthesis protein FlgA	(-1480924-1480268)	(+1431883-1432539)	(-1389177-1388521)	(+1516385-1517041)	(+1431376-1432032)	(-1335682-1335026)	(+1462684-1463340)	(+60417-61073)	(+1446576-1447232) id 94%	(-1554891-1554235)	(-1550992-1550336)	(-1550582-1549926)	(-1550846-1550190)	(+60449-61105)	(+60449-61105)	(+60449-61105)	(+60449-61105)	(-1552846-1552190)	(-1424671-1424015) id 92%	(-1424879-1424223) id 92%	(-1424957-1424301) id 92%	(-1425221-1424565) id 92%	(-1424943-1424287) id 92%	(-1427442-1426786) id 92%	(-1424995-1424339) id 92%	(-1424937-1424281) id 92%	(-1424996-1424340) id 92%	(-1427365-1426709) id 92%	(-1424937-1424281) id 92%	(+1424288-1424944) blastn id 92%- flgA flagellar basal body P-ring biosynthesis protein	(-843887-843231) id 92%	(-1463507-1462851)	(-1476646-1475990)	(-1487736-1487080)	(-1446942-1446286)	(-1431966-1431310)	(-1501574-1500918)	(-1452197-1451541)	(-1431743-1431087)	(-1465352-1464696)	(-1441403-1440747)	(-1439683-1439027)
	flgB	(-1579905-1579483) flagellar basal body rod protein FlgB id 96%	(-1632098-1631676) flagellar basal body rod protein FlgB	(-1579884-1579462) flagellar basal body rod protein FlgB	(-1564602-1564180) flagellar basal body rod protein FlgB	(-1640872-1640450) flagellar basal body rod protein FlgB	(-1642445-1642023) flagellar biosynthesis protein FlgB	(-1599655-1599233)	(-1569635-1569213)	(-1506305-1505883)	(-26439-26017)	(+1314942-1315364)	(-1528336-1527914)	(+1349278-1349700)	(+1520483-1520905)	(+1562058-1562480) id 97%	(-1646651-1646229)	(-1642752-1642330)	(-1642343-1641921)	(-1642607-1642185)	(+1617787-1618209)	(+1617798-1618220)	(+1617804-1618226)	(+1617795-1618217)	(-1644607-1644185)	(+1643273-1643694) id 96%	(+1643452-1643873) id 96%	(+1643542-1643963) id 96%	(+1643822-1644243) id 96%	(+1643506-1643927) id 96%	(+1646032-1646453) id 96%	(+1643626-1644047) id 96%	(+1643470-1643891) id 96%	(+1643577-1643998) id 96%	(+1645969-1646390) id 96%	(+1643360-1643781) id 96%	(-1643952-1643530)	(+1062502-1062923) id 96%	(-1583736-1583314)	(-1594053-1593631)	(-1603848-1603426)	(-1565795-1565373)	(-1551687-1551265)	(-1622176-1621754)	(-1569128-1568706)	(-1548652-1548230)	(-1585116-1584694)	(-1559895-1559473)	(-1556620-1556198)
	flgC	(-1578985-1579470) flagellar basal body rod protein FlgC	(-1631663-1631178) flagellar basal body rod protein FlgC	(-1579449-1578964) flagellar basal body rod protein FlgC	(-1564167-1563682) flagellar basal body rod protein FlgC	(-1640437-1639952) flagellar basal body rod protein FlgC	(-1642010-1641525) flagellar basal-body rod protein FlgC	(-1599219-1598734)	(-1569200-1568715)	(-1505870-1505385)	(-26003-25518)	(+1315377-1315862)	(-1527899-1527414)	(+1349713-1350198)	(+1520918-1521403)	(+1561560-1562045) id 95%	(-1646216-1645731)	(-1642317-1641832)	(-1641908-1641423)	(-1642172-1641687)	(+1618222-1618707)	(+1618233-1618718)	(+1618239-1618724)	(+1618230-1618715)	(-1644172-1643687)	(+1642773-1643258) id 96%	(+1642952-1643437) id 96%	(+1643042-1643527) id 96%	(+1643322-1643807) id 96%	(+1643006-1643491) id 96%	(+1645532-1646017) id 96%	(+1643126-1643611) id 96%	(+1642970-1643455) id 96%	(+1643077-1643562) id 96%	(+1645469-1645954) id 96%	(+1642860-1643345) id 96%	(-1643516-1643031)	(+1062002-1062487) id 96%	(-1583301-1582816)	(-1593618-1593133)	(-1603413-1602928)	(-1565360-1564875)	(-1551252-1550767)	(-1621741-1621256)	(-1568693-1568208)	(-1548217-1547732)	(-1584681-1584196)	(-1559460-1558975)	(-1556185-1555700)
	flgD	(+871991-873064) flagellar basal body rod modification protein FlgD	(-764344-763319) hypothetical protein id 93%	(+871989-873062) flagellar basal body rod modification protein FlgD	(+943218-944201) hypothetical protein id 92%	(+957744-958649) flagellar basal body rod modification protein flgD	(+895879-896808) flagellar basal body rod modification protein flgD	(+884536-885549) hypothetical protein id 92%	(+889785-890780) hypothetical protein id 93%	(-388428-387454)	(+972112-973107) hypothetical protein id 94%	(+849351-850286)	(+889457-890443) hypothetical protein id 92%	(+848727-849611)	(-563345-562341)	(+944355-945301) id 93%	(+960041-960946)	(+958127-959032)	(+958172-959077)	(+958172-959077)	(-620251-619226)	(-620262-619237)	(-620266-619241)	(-620258-619233)	(+958189-959094)	(+971730-972656) id 96%	(+971979-972905) id 96%	(+972003-972929) id 96%	(+972234-973160) id 96%	(+972003-972929) id 96%	(+974419-975345) id 96%	(+972027-972953) id 96%	(+971989-972915) id 96%	(+972027-972953) id 96%	(+974402-975328) id 96%	(+972006-972932) id 96%	(+971999-973036)	(+390918-391844) id 96%	(+949047-950036)	(+958678-959637)	(+966845-967789)	(+939717-940592)	(+922245-923225)	(+959599-960552)	(+943805-944809)	(-385146-384256)	(+948633-949607)	(+939125-940114)	(-393373-392483)
	flgE_1	(-837186-835030) flagellar hook protein FlgE	(-1192650-1190494) flagellar hook protein FlgE	(-837184-835028) flagellar hook protein FlgE id 97%	(-907426-905270) flagellar hook protein FlgE id 96%	(-922198-920042) flagellar hook protein FlgE id 96%	(+507319-509475) flagellar hook protein FlgE id 96%	(+486423-488579) id 97%	(+466074-468230) id 97%	(+422590-424746) id 96%	(-935268-933112) id 98%	(+468665-470821) id 96%	(-850799-848643) id 94%	(+453438-455594) id 96%	(-998194-996038) id 96%	(-522421-520265) id 96%	(-924491-922335) id 96%	(-922579-920423) id 96%	(-922624-920468) id 96%	(-922624-920468) id 96%	(-1060304-1058148) id 97%	(-1060311-1058155) id 97%	(-1060319-1058163) id 97%	(-1060311-1058155) id 97%	(-922639-920483) id 96%	(+929801-931957) id 98%	(+930052-932208) id 98%	(+930077-932233) id 98%	(+930305-932461) id 98%	(+930074-932230) id 98%	(+932473-934629) id 98%	(+930098-932254) id 98%	(+930061-932217) id 98%	(+930098-932254) id 98%	(+932474-934630) id 98%	(+930079-932235) id 98%	(-932227-930071)	(+348996-351152) id 98%	(+521406-523562) id 96%	(-922040-919884) id 96%	(-749864-747708) id 96%	(+510525-512681) id 96%	(-885959-883803) id 96%	(+516738-518894) id 96%	(+506954-509110) id 96%	(-811863-809707) id 96%	(-911140-908984) id 96%	(+513441-515597) id 96%	(-819275-817119) id 96%
	flgE_2	(+873061-874878) flagellar hook protein FlgE id 97%	(-763322-761505) flagellar hook protein FlgE id 96%	(+873059-874876) flagellar hook protein FlgE id 97%	(+944198-946015) flagellar hook protein FlgE id 95%	(+958646-960463) flagellar hook protein FlgE id 96%	(+896805-898622) flagellar biosynthesis protein FlgE 96%	(+885521-887338) id 96%	(+890777-892594) id 96%	(-387457-385640) id 95%	(+973104-974921) id 97%	(+850283-852100) id 95%	(+890440-892257) id 94%	(+849608-851425) id 96%	(-562344-560527) id 96%	(+945356-947173) id 96%	(+960943-962760) id 96%	(+959029-960846) id 96%	(+959074-960891) id 96%	(+959074-960891) id 96%	(-619229-617412) id 97%	(-619236-617419) id 97%	(-619244-617427) id 97%	(-619236-617419) id 97%	(+959091-960908) id 96%	(+972764-974581) id 97%	(+973013-974830) id 97%	(+973037-974854) id 97%	(+973268-975085) id 97%	(+973037-974854) id 97%	(+975453-977270) id 97%	(+973061-974878) id 97%	(+973023-974840) id 97%	(+973061-974878) id 97%	(+975436-977253) id 97%	(+973040-974857) id 97%	(+973033-974850)	(+391952-393769) id 97%	(+950033-951850) id 95%	(+959634-961451) id 96%	(+967786-969603) id 95%	(+940589-942406) id 96%	(+923222-925039) id 95%	(+960549-962366) id 95%	(+944806-946623) id 96%	(-384259-382442) id 96%	(+949604-951421) id 96%	(+940111-941928) id 96%	(-392486-390669) id 95%
	flgG_1	(-358027-357218) flagellar basal body rod protein FlgG	(+1318583-1319392) flagellar basal body rod protein FlgG	(-358030-357221) flagellar basal body rod protein FlgG id 95%	(-389639-388830) flagellar basal body rod protein FlgG id 92%	(+1154633-1155442) flagellar basal body rod protein FlgG	(-384474-383665) flagellar biosynthesis protein FlgG 97%	(-362648-361839) id 95%	(-317199-316390) id 93%	(+926134-926943) id 94%	(-418486-417677) id 98%	(-346690-345881) id 94%	(-361625-360816) id 94%	(-319595-318786) id 93%	(+1122104-1122913) id 93%	(+395067-395876) id 93%	(+1158900-1159709) flagellar hook-basal body protein 94%	(+1155009-1155818) flagellar hook-basal body protein id 94%	(+1155060-1155869) flagellar hook-basal body protein id 94%	(+1155054-1155863) flagellar hook-basal body protein id 94%	(+1186667-1187476) flagellar hook-basal body protein id 94%	(+1186675-1187484) flagellar hook-basal body protein id 94%	(+1186683-1187492) id 94%	(+1186675-1187484) flagellar hook-basal body protein id 94%	(+1157054-1157863) flagellar hook-basal body protein id 94%	(+359847-360656) id 97%	(+359835-360644) id 97%	(+359845-360654) id 97%	(+360066-360875) id 97%	(+359846-360655) id 97%	(+359844-360653) id 97%	(+359854-360663) id 97%	(+359834-360643) id 97%	(+359862-360671) id 97%	(+359844-360653) id 97%	(+359855-360664) id 97%	(-360655-359846)	(+1446685-1447494) id 97%	(-372310-371501) id 93%	(-397390-396581) id 93%	(-397696-396887) id 93%	(-385223-384414) id 93%	(-364714-363905) id 94%	(-390462-389653) id 93%	(-379913-379104) id 93%	(+936638-937447) flagellar basal-body rod protein id 93%	(-380386-379577) id 93%	(-388627-387818) id 93%	(+942796-943605) id 93%
	flgG_2	(+1599928-1600716) flagellar basal body rod protein FlgG	(+1654983-1655771) flagellar basal body rod protein FlgG	(+1599907-1600695) flagellar basal body rod protein FlgG id 95%	(+1584205-1584993) flagellar basal body rod protein FlgG id 95%	(+1663026-1663814) flagellar basal body rod protein FlgG id 95%	(+1663130-1663918) flagellar basal-body rod protein FlgG id 98%	(+1620260-1621048) id 96%	(+1590870-1591658) id 94%	(+1526533-1527321) id 95%	(+48659-49447) id 96%	(-1293651-1292863) id 96%	(-1549753-1550541) id 94%	(-1328145-1327357) id 96%	(-1500226-1499438) id 94%	(+17217-18005) id 95%	(+1668865-1669653) id 95%	(+1664965-1665753) id 95%	(+1664557-1665345) id 95%	(+1664821-1665609) id 95%	(-1595890-1595102) id 96%	(+1595015-1595113) id 96%	(-1595907-1595119) id 96%	(-1595898-1595110) id 96%	(+1666821-1667609) id 95%	(+1665775-1666563) id 97%	(+1665954-1666742) id 97%	(+1666044-1666832) id 97%	(+1666324-1667112) id 97%	(+1666008-1666796) id 97%	(+1668534-1669322) id 97%	(+1666128-1666916) id 97%	(+1665971-1666759) id 97%	(+1666079-1666867) id 97%	(+1668471-1669259) id 97%	(+1665862-1666650) id 97%	(+1666033-1666821)	(+1085004-1085792) id 97%	(+1603980-1604768) id 95%	(+1614261-1615049) id 95%	(+1624042-1624830) id 94%	(+1586087-1586875) id 95%	(+1571975-1572763) id 95%	(+1642479-1643267) id 94%	(+1589425-1590213) id 95%	(+1568955-1569743) id 94%	(+1605418-1606206) id 95%	(+1580197-1580985) id 94%	(+1576241-1577029) id 95%
	flgH	(+327659-328372) flagellar L-ring protein FlgH	(+662753-663466) flagellar L-ring protein FlgH	(+327662-328375) flagellar L-ring protein FlgH	(+346846-347559) flagellar L-ring protein FlgH	(+340777-341490) flagellar L-ring protein FlgH	(+356371-357084) flagellar biosynthesis protein FlgH	(+334880-335593)	(+293672-294385)	(-953544-952831)	(+393752-394465)	(+322942-323655)	(+336694-337392)	(+296012-296725)	(-1149422-1148709) id 98%	(+368359-369072) id 98%	(+340884-341597) flagellar L-ring protein id 100%	(+340873-341586) flagellar L-ring protein id 100%	(+340880-341593) flagellar L-ring protein id 100%	(+340876-341589) id 100%	(-1211149-1210436)	(-1211159-1210446)	(-1211165-1210452)	(-1211156-1210443) id 98%	(+340893-341606) flagellar L-ring protein id 100%	(+336418-337131) id 98%	(+336408-337121) id 98%	(+336417-337130) id 98%	(+336638-337351) id 98%	(+336418-337131) id 98%	(+336416-337129) id 98%	(+336425-337138) id 98%	(+336407-337120) id 98%	(+336434-337147) id 98%	(+336416-337129) id 98%	(+336428-337141) id 98%	(+336418-337131)	(+1423257-1423970) id 98%	(+344991-345704)	(+369651-370364)	(+370323-371036)	(+357636-358349)	(+336901-337614)	(+363328-364041)	(+352654-353367)	(-963755-963042)	(+353170-353883)	(+361553-362266)	(-970053-969340)
	flgl	(-247512-246484) flagellar P-ring protein FlgI	(-577306-576278) flagellar P-ring protein FlgI	(-247514-246486) flagellar P-ring protein FlgI	(-270337-269309) flagellar P-ring protein FlgI	(-255349-254321) flagellar P-ring protein FlgI	(-272228-271200) flagellar biosynthesis protein FlgI	(-248635-247607)	(-211880-210852)	(+1035205-1036233)	(-300491-299466)	(-242352-241324)	(-249950-248925)	(-214426-213398)	(+1226463-1227491)	(+283696-284724) id 96%	(-255448-254420) flagellar P-ring protein id 100%	(-255438-254410) flagellar P-ring protein id 100%	(-255444-254416) flagellar P-ring protein id 100%	(-255439-254411) flagellar P-ring protein id 100%	(+1292816-1293844)	(+1292825-1293853)	(+1292832-1293860)	(+1292823-1293851)	(-255457-254429) flagellar P-ring protein id 100%	(+251288-252316) id 97%	(+251280-52308) id 97%	(+251288-252316) id 97%	(+251508-252536) id 97%	(+251288-252316) id 97%	(+251287-252315) id 97%	(+251295-252323) id 97%	(+251277-252305) id 97%	(+251304-252332) id 97%	(+251287-252315) id 97%	(+251299-252327) id 97%	(-252316-252316) blastn id 97%- marcada like flagellar basal body P-ring biosynthesis protein FlgA marcada tambien flgI	(+1338127-1339155) id 97%	(-263265-262237)	(-288057-287029)	(-288736-287708)	(-275704-274676)	(-253488-252460)	(-279573-278545)	(-275725-274697)	(+1040400-1041428)	(-271255-270215)	(-281759-280731)	(+1042933-1043961)
	flgK	(-1080362-1078542) flagellar hook protein FlgK	(-1463741-1461921) flagellar hook protein FlgK	(-1080348-1078528) flagellar hook protein FlgK	(-1131506-1129686) flagellar hook protein FlgK	(-1186064-1184244) flagellar hook protein FlgK	(-1150839-1149019) flagellar biosynthesis protein FlgK	(-1134447-1132627)	(-1037316-1035496)	(+207426-209246)	(-1186223-1184403)	(-1035182-1033362)	(-1078520-1076700)	(-1031402-1029582)	(+372064-373884)	(-1131866-1133686) id 96%	(-1190331-1188511)	(-1186439-1184619)	(-1186491-1184671)	(-1186485-1184665)	(+346511-348331)	(+346519-348339)	(+346525-348345)	(+346517-348337)	(-1188485-1186665)	(-1485830-1484010) id 96%	(-1486038-1484218) id 96%	(-1486115-1484295) id 96%	(-1486380-1484560) id 96%	(-1486102-1484282) id 96%	(-1488601-1486781) id 96%	(-1486155-1484335) id 96%	(-1486095-1484275) id 96%	(-1486155-1484335) id 96%	(-1488524-1486704) id 96%	(-1485912-1484092) id 96%	(+1484283-1486103)	(-905046-903226) id 96%	(-1143262-1141442)	(-1151343-1149523)	(-1160484-1158664)	(-1130491-1128671)	(-1115766-1113946)	(-1157522-1155702)	(-1136815-1134995)	(+193164-194984)	(-1149497-1147677)	(-1131301-1129481)	(+200016-201836)
	flgL	(-305325-302839) flagellar hook protein FlgL	(-635060-632574) flagellar hook protein FlgL	(-305328-302842) flagellar hook protein FlgL	(-322576-320090) flagellar hook protein FlgL	(-314585-312099) flagellar hook protein FlgL	(-331864-329378) flagellar biosynthesis protein FlgL	(-308408-305922)	(-269555-267075)	(+977575-980061)	(-367660-365174)	(-300669-298183)	(-310060-307577)	(-272101-269615)	(+1173748-1176234)	(+341598-344077) id 95%	(-314683-312197)	(-314670-312184)	(-314680-312194)	(-314675-312189)	(+1233324-1235810)	(+1233333-1235819)	(+1233340-1235826)	(+1233331-1235817)	(-314692-312206)	(+309360-311836) id 96%	(+309350-311826) id 96%	(+309359-311835) id 96%	(+309580-312056) id 96%	(+309360-311836) id 96%	(+309358-311834) id 96%	(+309367-311843) id 96%	(+309349-311825) id 96%	(+309376-311852) id 96%	(+309358-311834) id 96%	(+309370-311846) id 96%	(-311836-309350)	(+1396199-1398675) id 96%	(-320807-318321)	(-347424-344938)	(-348102-345616)	(-333256-330770)	(-312808-310328)	(-338919-336433)	(-328117-325631)	(+987987-990473)	(-328805-326319)	(-339326-336840)	(+992241-994727)
	flhA	(-410250-408049) flagellar biosynthesis protein FlhA	(+1264829-1267030) flagellar biosynthesis protein FlhA	(-410253-408052) flagellar biosynthesis protein FlhA	(-443610-441409) flagellar biosynthesis protein FlhA	(+1100551-1102752) flagellar biosynthesis protein FlhA	(-436508-434307) flagellar biosynthesis protein FlhA	(-414965-412764)	(-369180-366979)	(+872410-874611)	(-471065-468864)	(-398134-395933)	(-415692-413491)	(-369202-367001)	(+1070260-1072461)	(-449526-447325) id 97%	(+1104818-1107019)	(+1100927-1103128)	(+1100978-1103179)	(+1100972-1103173)	(+1133012-1135213)	(+1133022-1135223)	(+1133027-1135228)	(+1133019-1135220)	(+1102972-1105173)	(-415697-413496) id 96%	(-415684-413483) id 96%	(-415695-413494) id 96%	(-415916-413715) id 96%	(-415695-413494) id 96%	(-415694-413493) id 96%	(-415705-413504) id 96%	(-415684-413483) id 96%	(-415712-413511) id 96%	(-415694-413493) id 96%	(-415703-413502) id 96%	(-415696-413495)	(-1502535-1500334) id 96%	(-424390-422189)	(-449460-447259)	(-449777-447576)	(-438913-436712)	(-416709-414508)	(-444106-441905)	(-433212-431011)	(+882831-885032)	(-434113-431912)	(-442285-440084)	(+888961-891161) blastn id 97% (+888961-890139) flagellar biosynthesis protein FlhA (+890133-891161) flagellar biosynthesis protein FlhA
	flhB_1	(+737726-738802) flagellar biosynthesis protein FlhB	(+1095882-1096958) flagellar biosynthesis protein FlhB	(+737724-738800) flagellar biosynthesis protein FlhB id 96%	(+806681-807757) flagellar biosynthesis protein FlhB id 95%	(+821747-822823) flagellar biosynthesis protein FlhB id 96%	(-600914-599838) flagellar biosynthetic protein FlhB id 96%	(-586052-584976) id 95%	(-562516-561440) id 95%	DELETION/pseudo (-520719-519644) flagellar biosynthesis protein FlhB; disrupted; no sequence id 94%	(+836862-837938) id 98%	(-566231-565155) id 95%	(+749964-751040) id 93%	(-547613-546537) id 95%	(+897986-899062) id 94%	(-619604-618528) id 95%	(+824041-825117) id 96%	(+822135-823211) id 96%	(+822173-823249) id 96%	(+822172-823248) id 96%	(+960732-961808) id 95%	(+960739-961815) id 95%	(+960747-961823) id 95%	(+960739-961815) id 95%	(+822187-823263) id 96%	(+828423-829493) id 98%	(+828675-829745) id 98%	(+828699-829769) id 98%	(+828926-829996) id 98%	(+828696-829766) id 98%	(+831096-832166) id 98%	(+828717-829787) id 98%	(+828684-829754) id 98%	(+828720-829790) id 98%	(+831096-832166) id 98%	(+828702-829772) id 98%	(+828690-829769) id 98%	(+247618-248688) id 98%	(-620786-619710) id 95%	(+825086-826162) id 95%	(+652439-653515) id 95%	(-607278-606202) id 95%	(+785680-786756) id 95%	(-615674-614598) id 95%	(-607971-606895) id 95%	(+713035-714111) id 95%	(+811683-812759) id 95%	(-614573-613497) id 95%	(+718978-720054) id 95%
	flhB_2	(+1592656-1592928) flagellar biosynthesis protein FlhB	(+1646038-1646310) flagellar biosynthesis protein FlhB id 97%	(+1592635-1592907) flagellar biosynthesis protein FlhB id 97%	(+1576931-1577203) flagellar biosynthesis protein FlhB id 98%	(+1654753-1655025) flagellar biosynthesis protein FlhB id 97%	(+1655182-1655454) flagellar biosynthesis protein FlhB id 99%	(+1612338-1612610) id 98%	(+1583592-1583864) id 99%	(+1518627-1518899) id 98%	(+40387-40659) id 98%	(-1301062-1300790)	(+1541590-1541862) id 96%	(-1336560-1336288) id 97%	(-1508142-1507870) id 98%	(+9313-9578) id 97% evalue 2e-127	(+1660592-1660864) id 97%	(+1656692-1656964) id 97%	(+1656284-1656556) id 97%	(+1656548-1656820) id 97%	(-1603838-1603566) id 98%	(-1603846-1603574) id 98%	(-1603855-1603583) id 98%	(-1603846-1603574) id 98%	(+1658548-1658820) id 97%	(+1657636-1657908) id 99%	(+1657815-1658087) id 99%	(+1657905-1658177) id 99%	(+1658185-1658457) id 99%	(+1657869-1658141) id 99%	(+1660395-1660667) id 99%	(+1657989-1658261) id 99%	(+1657832-1658104) id 99%	(+1657940-1658212) id 99%	(+1660332-1660604) id 99%	(+1657723-1657995) id 99%	(+1657894-1658166) flagellar biosynthesis protein id 99%	(+1076865-1077137) id 99%	(+1596070-1596342) id 97%	(-1606389-1606661) id 97%	(+1616176-1616448) id 98%	(+1578118-1578390) id 97%	(+1564018-1564290) id 98%	(+1634506-1634778) id 97%	(+1581460-1581732) id 97%	(+1560978-1561250) id 98%	(+1597451-1597723) id 97%	(+1572220-1572492) id 97%	(+1568969-1569241) ABC transporter id 96%
	flhF	(+414181-415557) flagellar biosynthesis regulator FlhF	(-1260896-1259520) flagellar biosynthesis regulator FlhF	(+414184-415560) flagellar biosynthesis regulator FlhF	(+447545-448921) flagellar biosynthesis regulator FlhF	(-1096614-1095238) flagellar biosynthesis regulator FlhF	(+440437-441813) flagellar biosynthesis protein FlhF	(+418891-420264)	(+373114-374487)	(-868475-867099)	DELETION/pseudo (+475003-476369) flagellar biosynthesis regulator FlhF; disrupted no sequence	(+402018-403394) id 97%	(+419648-421021)	(+373088-374467)	(-1066327-1064950)	(-454786-453410) id 97%	(-1100884-1099505)	(-1096993-1095614)	(-1097044-1095665)	(-1097038-1095659)	(-1129083-1127704)	(-1129093-1127714)	(-1129098-1127719)	(-1129090-1127711)	(-1099038-1097659)	(-421006-419636) id 96%	(-420993-419623) id 96%	(-421004-419634) id 96%	(-421225-419855) id 96%	(-421004-419634) id 96%	(-421003-419633) id 96%	(-421014-419644) id 96%	(-420993-419623) id 96%	(-421021-419651) id 96%	(-421003-419633) id 96%	(-421012-419642) id 96%	(+419635-421005)	(-1507844-1506474) id 96%	(+428325-429701)	(+453394-454770)	(+453711-455087)	(+442848-443225)	(+420641-422017)	(+448041-449417)	(+437146-438522)	(-878895-877519)	(+438047-439423)	(+446219-447592)	(-885025-883649)
	fliA	(+416735-417502) RNA polymerase sigma 70	(+1257573-1258340) RNA polymerase sigma 70 id 98%	(+416738-417505) RNA polymerase sigma 70 id 95%	(+450099-450875) RNA polymerase sigma 70 id 96%	(-1094058-1093291) RNA polymerase sigma 70 id 100%	(+442991-443758) RNA polymerase subunit sigma-70 id 96%	(+421442-422209) RNA polymerase subunit sigma-70 id 96%	(+375667-376443) RNA polymerase sigma 70 id 95%	(-865921-865145) RNA polymerase sigma 70 id 95%	(+477547-478314) RNA polymerase sigma 70 id 96%	(+404572-405339) id 95%	(+422199-422975) RNA polymerase sigma 70 id 90%	(+375645-376412) RNA polymerase sigma 70 id 95%	(-1063774-1062998)	(-456740-455964) id 95%	(-1098325-1097558) id 100%	(-1094434-1093667)	(-1094485-1093718)	(-1094479-1093712) RNA polymerase sigma factor FliA	(-1126524-1125757)	(-1126534-1125767)	(-1126539-1125772)	(-1126531-1125764)	(-1096479-1095712)	(-422951-422184) id 95%	(-422938-422171) id 95%	(-422949-422182) id 95%	(-423170-422403) id 95%	(-422949-422182) id 95%	(-422948-422181) id 95%	(-422959-422192) id 95%	(-422938-422171) id 95%	(-422966-422199) id 95%	(-422948-422181) id 95%	(-422957-422190) id 95%	(+422207-422950)	(-1509789-1509022) id 95%	(+430888-431655)	(+455957-456724)	(+456274-457041)	(+445412-446179)	(+423206-423973)	(+450606-451373)	(+439709-440476)	(-876332-875565)	(+440610-441377)	(+448779-449546)	(-882462-881695)
	fliD	(+724928-726985) flagellar capping protein fliD	(+1079951-1082008) flagellar capping protein fliD	(+724926-726983) flagellar capping protein fliD	(+791457-793514) flagellar capping protein fliD	(+806460-808517) flagellar capping protein fliD	(-616653-614596) flagellar capping protein fliD	(-602091-600034)	(-577397-575340)	(-536847-534790)	(+821555-823612)	(-582235-580178)	(+733486-735543)	(-563544-561487)	(+883081-885106)	(-634526-632501) id 97%	(+808737-810762)	(+806831-808856)	(+806887-808912)	(+806885-808910)	(+944563-946588)	(+944574-946599)	(+944578-946603)	(+944570-946595)	(+806901-808926)	(+812336-814361) id 95%	(+812590-814615) id 95%	(+812612-814637) id 95%	(+812839-814864) id 95%	(+812610-814635) id 95%	(+815009-817034) id 95%	(+812630-814655) id 95%	(+812597-814622) id 95%	(+812633-814658) id 95%	(+815009-817034) id 95%	(+812615-814640) id 95%	(+812612-814669)	(+231532-233557) id 95%	(-636108-634051)	(+809917-811974)	(+637235-639292)	(-621880-619823)	(+770809-772866)	(-631116-629059)	(-624017-621960)	(+697937-699994)	(+797060-799117)	(-630662-628605)	(+703452-705509)
	fliE	(-1578859-1578530) flagellar hook-basal body protein FliE	(-1631050-1630721) flagellar hook-basal body protein FliE	(-1578838-1578509) flagellar hook-basal body protein FliE	(-1563554-1563225) flagellar hook-basal body protein FliE	(-1639824-1639495) flagellar hook-basal body protein FliE	(-1641397-1641068) flagellar hook-basal body protein FliE	(-1598606-1598277)	(-1568587-1568258)	(-1505257-1504928)	(-25390-25061)	(+1315990-1316319)	(-1527286-1526957)	(+1350326-1350655)	(+1521531-1521860)	(+1561103-1561431) id 96%	(-1645603-1645274)	(-1641704-1641375)	(-1641295-1640966)	(-1641559-1641230)	(+1618835-1619164)	(+1618846-1619175)	(+1618852-1619181)	(+1618843-1619172)	(-1643559-1643230)	(+1642317-1642645) id 95%	(+1642496-1642824) id 95%	(+1642586-1642914) id 95%	(+1642866-1643194) id 95%	(+1642550-1642878) id 95%	(+1645076-1645404) id 95%	(+1642670-1642998) id 95%	(+1642514-1642842) id 95%	(+1642621-1642949) id 95%	(+1645013-1645341) id 95%	(+1642404-1642732) id 95%	(-1642903-1642574)	(+1061546-1061874) id 95%	(-1582687-1582358)	(-1593005-1592676)	(-1602800-1602471)	(-1564747-1564418)	(-1550639-1550388)	(-1621128-1620799)	(-1568079-1567750)	(-1547603-1547274)	(-1584068-1583739)	(-1558847-1558518)	(-1555571-1555242)
	fliF	(+346272-347975) flagellar M-ring protein FliF	(-1329917-1328214) flagellar M-ring protein FliF	(+346275-347978) flagellar M-ring protein FliF	(+380515-382218) flagellar M-ring protein FliF	(+358982-360685) flagellar M-ring protein FliF	DELETION/pseudo (+374570-376274) flagellar M-ring protein FliF; disrupted no sequence	(+352969-354672)	(+308174-309877)	(-935565-933862)	(+408572-410275)	(+337151-338854)	(+352005-353708)	(+310205-311908)	(-1131534-1129831)	(+386444-388147) id 96%	(+359090-360793)	(+359078-360781)	(+359085-360788)	(+359082-360785)	(-1196340-1194637)	(-1196351-1194648)	(-1196356-1194653)	(-1196348-1194645)	(+359099-360802)	(+351137-352840) id 95%	(+351125-352828) id 95%	(+351135-352838) id 95%	(+351356-353059) id 95%	(+351136-352839) id 95%	(+351134-352837) id 95%	(+351144-352847) id 95%	(+351124-352827) id 95%	(+351152-352855) id 95%	(+351134-352837) id 95%	(+351145-352848) id 95%	(+351136-352839)	(+1437975-1439678) id 95%	(+362917-364620)	(+387540-389243)	(+388230-389933)	(+375414-377117)	(+354899-356602)	(+381097-382800)	(+370474-370962)	(-946000-944297)	(+371024-372727)	(+379337-381022)	(-952094-950391)
	fliG	(+347993-349024) flagellar motor switch protein FliG	(-1328196-1327165) flagellar motor switch protein FliG	(+347996-349027) flagellar motor switch protein FliG	(+382237-383268) flagellar motor switch protein FliG	(+360703-361734) flagellar motor switch protein FliG	(+376292-377323) flagellar motor switch protein FliG	(+354685-355716)	(+309895-310926)	(-933843-932812)	(+410288-411319)	(+338872-339903)	(+353740-354771)	(+311926-312957)	(-1129812-1128781)	(+388166-389197) id 96%	(+360811-361842)	(+360799-361830)	(+360806-361837)	(+360803-361834)	(-1194619-1193588)	(-1194630-1193599)	(-1194635-1193604)	(-1194627-1193596)	(+360820-361851)	(+352858-353889) id 96%	(+352846-353877) id 96%	(+352856-353887) id 96%	(+353077-354108) id 96%	(+352857-353888) id 96%	(+352855-353886) id 96%	(+352865-353896) id 96%	(+352845-353876) id 96%	(+352873-353904) id 96%	(+352855-353886) id 96%	(+352866-353897) id 96%	(+352857-353888)	(+1439696-1440727) id 96%	(+364639-365670)	(+389262-390293)	(+389952-390983)	(+377136-378167)	(+356621-357652)	(+382819-383850)	(+372197-373228)	(-944278-943247)	(+372746-373777)	(+381041-382072)	(-950372-949341)
	fliH	(+349011-349790) flagellar assembly protein H fliH	(-1327178-1326399) flagellar assembly protein H	(+349014-349793) flagellar assembly protein H	(+383279-384031) flagellar assembly protein H	(+361745-362497) flagellar assembly protein H	(+377334-378086) flagellar assembly protein H	(+355727-356479)	(+310937-311689)	(-932801-932049)	(+411330-412082)	(+339914-340666)	(+354782-355534)	(+312968-313720)	(-1128794-1128018)	(+389184-389960) id 97%	(+361829-362605)	(+361817-362593)	(+361824-362600)	(+361821-362597)	(-1193601-1192825)	(-1193612-1192836)	(-1193617-1192841)	(-1193609-1192833)	(+361838-362614)	(+353876-354652) id 97%	(+353864-354640) id 97%	(+353874-354650) id 97%	(+354095-354871) id 97%	(+353875-354651) id 97%	(+353873-354649) id 97%	(+353883-354659) id 97%	(+353863-354639) id 97%	(+353891-354667) id 97%	(+353873-354649) id 97%	(+353884-354660) id 97%	(+353881-354651)	(+1440714-1441490) id 97%	(+365663-366433)	(+390286-391056)	(+390976-391746)	(+378160-378930)	(+357645-358415)	(+383843-384613)	(+373221-373991)	(-943254-942484)	(+373770-374540)	(+382065-382835)	(-949348-948578)
	fliI	(-1365718-1364414) annotated as ATP synthase	(+251053-252357) ATP synthase	(-1365697-1364393) ATP synthase id 98%	(-1383746-1382442) ATP synthase id 97%	(-1490483-1489179) ATP synthase id 100%	(-1465520-1464216) flagellar protein export ATPase FliI	(-1423847-1422543) flagellar protein export ATPase FliI	(+1487818-1489122) ATP synthase id 97%	(-1333548-1332244) ATP synthase id 97%	(+1569791-1571095) ATP synthase id 97%	(+1485171-1486475) ATP synthase id 96%	(+1489053-1490357) ATP synthase id 94%	(+1517625-1518929) ATP synthase id 97%	(+117595-118899) EscN/YscN/HrcN family type III secretion system ATPase id 98%	(+1388147-1389451) id 97%	(-1496263-1494959) flagellum-specific ATP synthase id 100%	(-1492365-1491061) flagellum-specific ATP synthase id 100%	(-1491954-1490650) flagellum-specific ATP synthase id 100%	(-1492218-1490914) flagellum-specific ATP synthase id 100%	(+118108-119412)	(+118109-119413)	(+118108-119412)	(+118107-119411)	(+1494219-1492915) flagellum-specific ATP synthase id 100%	(+1093217-1094521) id 98%	(+1093480-1094784) id 98%	(+1093503-1094807) id 98%	(+1093765-1095069) id 98%	(+1093490-1094794) id 98%	(+1095986-1097290) id 98%	(+1093536-1094840) id 98%	(+1093489-1094793) id 98%	(+1093533-1094837) id 98%	(+1095912-1097216) id 98%	(+1093488-1094792) id 98%	(-1094794-1093490)	(+512418-513722) id 98%	(-1405769-1404465)	(-1415090-1413786)	(-1424974-1423670)	(-1388971-1387667)	(-1375083-1373779)	(-1443504-1442200)	(-1394810-1393506)	(-1376110-1374806)	(-1407733-1406429)	(-1385704-1384400)	(-1382577-1381273)
	fliL	(-779445-778894) flagellar basal body-associated protein FliL	(-1138112-1137561) flagellar basal body-associated protein FliL	(-779443-778892) flagellar basal body-associated protein FliL	(-850087-849536) flagellar basal body-associated protein FliL	(-864089-863538) flagellar basal body-associated protein FliL	(+559448-559999) flagellar basal body-associated protein FliL	(+544571-545122)	(+520773-521324)	(+478096-478647)	(-878518-877967)	(+525047-525598)	(-793294-792743)	(+505135-505686)	(-939490-938939)	(-578330-577779) id 96%	(-866384-865833)	(-864477-863926)	(-864516-863965)	(-864515-863964)	(-1002850-1002299)	(-1002861-1002310)	(-1002865-1002314)	(-1002857-1002306)	(-864530-863979)	(+876039-876590) id 97%	(+876290-876841) id 97%	(+876315-876866) id 97%	(+876542-877093) id 97%	(+876312-876863) id 97%	(+878712-879263) id 97%	(+876336-876887) id 97%	(+876300-876851) id 97%	(+876336-876887) id 97%	(+878712-879263) id 97%	(+876317-876868) id 97%	(-876860-876309)	(+295234-295785) id 97%	(+577512-578063)	(-866565-866014)	(-693746-693195)	(+565228-565779)	(-827896-827345)	(+572743-573294)	(+563857-564408)	(-755544-754993)	(-855109-854558)	(+570960-571511)	(-763109-762558)
	fliM	(+417495-418559) flagellar motor switch protein FliM	(-1257580-1256516) flagellar motor switch protein FliM	(+417498-418562) flagellar motor switch protein FliM	(+450868-451932) flagellar motor switch protein FliM	(-1093298-1092234) flagellar motor switch protein FliM	(+443751-444815) flagellar motor switch protein FliM	(+422202-423266)	(+376436-377500)	(-865152-864088)	(+478307-479371)	(+405332-406396)	(+422968-424032)	(+376405-377469)	(-1063005-1061941)	(-457797-456733) id 97%	(-1097565-1096501)	(-1093674-1092610)	(-1093725-1092661)	(-1093719-1092655)	(-1125764-1124700)	(-1125774-1124710)	(-1125779-1124715)	(-1125771-1124707)	(-1095719-1094655)	(-424008-422944) id 97%	(-423995-422931) id 97%	(-424006-422942) id 97%	(-424227-423163) id 97%	(-424006-422942) id 97%	(-424005-422941) id 97%	(-424016-422952) id 97%	(-423995-422931) id 97%	(-424023-422959) id 97%	(-424005-422941) id 97%	(-424014-422950) id 97%	(+422943-424007)	(-1510846-1509782) id 97%	(+431648-432712)	(+456717-457781)	(+457034-458098)	(+446172-447236)	(+423966-425030)	(+451366-452430)	(+440469-441533)	(-875572-874508) blastn id 97% and gbk – flagellar motor switch protein FliM (-873612-873076) fliM2	(+441370-442434)	(+449539-450603)	(-881702-880638) blastn id 97% and gbk- flagellar motor switch protein FliM (-879742-879206) fliM2
	fliN	(-534318-533947) flagellar motor switch protein id 96% e value 3e-175	(-889135-888764) flagellar motor switch protein id 97%	(-534316-533945) flagellar motor switch protein id 96%	(-603502-603131) flagellar motor switch protein id 99%	(-614837-614466) flagellar motor switch protein 97%	(+806105-806476) flagellar motor switch protein id 96%	(+795270-795641) flagellar motor switch protein id 97%	(+768495-768866) flagellar motor switch protein id 97%	(+715129-715500) flagellar motor switch protein id 99%	(-634119-633748) flagellar motor switch protein id 97%	(+764027-764398) flagellar motor switch protein id 99%	(-543668-543297) flagellar motor switch protein id 96%	(+745526-745897) flagellar motor switch protein id 98%	(-695811-695440) blastn and gbk id 99%- flagellar motor switch protein FliN	(+818488-818859) id 100%	(-615235-614864) blastn id 97% e value 3e-175 and gbk flagellar motor switch protein FliN	(-615218-614847) blastn id 97% e value 3e-175 and gbk flagellar motor switch protein FliN	(-615272-614901) blastn id 97% e value 3e-175 and gbk – flagellar motor switch protein FliN	(-615269-614898) blastn id 97% e value 3e-175 and gbk- Flagellar motor switch protein FliN	(-751821-751450) blastn id 97% e value 3e-175 and gbk- flagellar motor switch protein FliN	(-751832-751461) blastn id 97% e value 3e-175 and gbk - flagellar motor switch protein FliN	(-751836-751465) blastn id 97% e value 3e-175 and gbk -flagellar motor switch protein FliN	(-751828-751457) blastn id 97% e value 3e-175 and gbk- flagellar motor switch protein FliN	(-615284-614913) blastn id 97% e value 3e-175 and gbk- flagellar motor switch protein FliN	(-616605-616234) id 96%	(-616587-616216) id 96%	(-616599-616228) id 96%	(-616826-616455) id 96%	(-616604-616233) id 96%	(-619002-618631) id 96%	(-616616-616245) id 96%	(-616589-616218) id 96%	(-616621-616250) id 96%	(-618999-618628) id 96%	(-616607-616236) id 96%	(-616602-616231)	(-35523-35152) id 96%	(+823766-824137) flagellar motor switch protein id 99%	(-609678-609307) flagellar motor switch protein id 99%	(+840747-841118) flagellar motor switch protein id 99%	(+815435-815809) flagellar motor switch protein id 98%	(-544402-544010) flagellar motor switch protein blastn id 94% gap intermedio	(+834466-834837) flagellar motor switch protein id 99%	(+817500-817871) flagellar motor switch protein id 99%	(-512420-512049) flagellar motor switch protein id 99%	(-597075-596704) flagellar motor switch protein id 99%	(+814422-814793) flagellar motor switch protein id 98%	(-519907-519536) flagellar motor switch protein id 99%
	fliP	(+654018-654764) flagellar biosynthesis protein flip id 96%	(+1008466-1009212) flagellar biosynthesis protein flip with fliP 2017 id 96%	(+654016-654762) flagellar biosynthesis protein flip	(-705945-705199) flagellar biosynthesis protein flip	(+733668-733985) flagellar biosynthesis protein id 96%	(-688584-687838) flagellar biosynthesis protein flip and blastn id 95% (-688715-688617) flagellar biosynthesis protein flip	(-676446-675700) blastn id 96% and gbk flagellar biosynthesis protein flip (-676571-676479) flagellar biosynthesis protein flip	(-647663-646917)	(-604484-603738) flagellar biosynthesis protein flip blastn id 96% (-604609-604463) flagellar biosynthesis protein flip	(+750097-750843)	(-651447-650701)	(+658359-659105)	(-633753-633007)	(+812098-812844)	(-703457-702714) id 95%	(+733931-734029) blastn id 96% and gbk- flagellar biosynthesis protein flip, DELETION/pseudo (+734062-734809) frameshifted no sequence; flagellar biosynthetic protein FliP	(+733911-734009) flagellar biosynthesis protein flip, DELETION/pseudo (+734042-734789) blastn and gbk id 96%- frameshifted no sequence; flagellar biosynthetic protein FliP	(+733968-734066) flagellar biosynthesis protein flip, DELETION/pseudo (+734099-734846) frameshifted no sequence; flagellar biosynthesis protein flip blastn id 96%	(+733965-734063) flagellar biosynthesis protein flip (+734096-734843) flagellar biosynthetic protein FliP blastn id 96%	(+871315-872061)	(+871326-872072)	(+871330-872076)	(+871322-872068)	(+733981-734079) flagellar biosynthesis protein flip DELETION/pseudo (+734112-734859) blastn and gbk id 96%- flagellar biosynthetic protein FliP frameshifted; no sequence	(+735017-735767) id 98%	(+735274-736024) id 98%	(+735291-736041) id 98%	(+735520-736270) id 98%	(+735291-736041) id 98%	(+737694-738444) id 98%	(+735309-736059) id 98%	(+735280-736030) id 98%	(+735314-736064) id 98%	(+737691-738441) id 98%	(+735298-736048) id 98%	(+735293-736045)	(+154215-154965) id 98%	(+721629-722375)	(-725030-724284)	(-551631-550885)	(-690743-689997)	(+659835-660581)	(-719381-718635)	(-701033-700287)	(-612488-611742)	(-709545-708799)	(+715591-716337)	(+634571-635317)
	fliQ	(-1364403-1364137) flagellar biosynthesis protein FliQ en blastn (+1364137-1364403) e value 9e-124 id 97%	(+252368-252634) flagellar biosynthesis protein FliQ	(-1364382-1364116) flagellar biosynthesis protein FliQ	(-1382431-1382165) flagellar biosynthesis protein FliQ	(-1489168-1488902) flagellar biosynthesis protein FliQ	(-1464205-1463939) flagellar biosynthetic protein FliQ	(-1422532-1422266)	(+1489133-1489399)	(-1332233-1331967)	(+1571106-1571372)	(+1486486-1486752)	(+1490368-1490634)	(+1518940-1519206)	(+118910-119176)	(+1387870-1388136) id 96%	(-1494948-1494682)	(-1491050-1490784)	(-1490639-1490373)	(-1490903-1490637)	(+119423-119689)	(+119424-119690)	(+119423-119689)	(+119422-119688)	(-1492904-1492638)	(+1092941-1093206) id 97%	(+1093204-1093469) id 97%	(+1093227-1093492) id 97%	(+1093489-1093754) id 97%	(+1093214-1093479) id 97%	(+1095710-1095975) id 97%	(+1093260-1093525) id 97%	(+1093213-1093478) id 97%	(+1093257-1093522) id 97%	(+1095636-1095901) id 97%	(+1093212-1093477) id 97%	(-1093479-1093213)	(+512142-512407) id 97%	(-1404454-1404188)	(-1413775-1413509)	(-1423659-1423393)	(-1387656-1387390)	(-1373768-1373502)	(-1442189-1441923)	(-1393495-1393229)	(-1374795-1374529)	(-1406418-1406152)	(-1384389-1384123)	(-1381262-1380996)
	fliR	(-171474-170707) flagellar biosynthesis protein FliR	(-500142-499375) flagellar biosynthesis protein FliR	(-171474-170707) flagellar biosynthesis protein FliR	(-192486-191719) flagellar biosynthesis protein FliR	(-180617-179850) flagellar biosynthesis protein FliR	(-197398-196631) flagellar biosynthetic protein FliR	(-175059-174292)	(-164017-163250)	(+1110362-1111129)	(-224602-223835)	(-169758-168991)	(-176606-175839)	(-143243-142476)	(+1305836-1306603)	(+208741-209508) id 98%	(-180715-179948)	(-180708-179941)	(-180712-179945)	(-180707-179940)	(+1366280-1367047)	(+1366290-1367057)	(+1366297-1367064)	(+1366287-1367054)	(-180724-179957)	(+177140-177907) id 94%	(+177134-177901) id 94%	(+177136-177903) id 94%	(+177359-178126) id 94%	(+177139-177906) id 94%	(+177138-177905) id 94%	(+177144-177911) id 94%	(+177133-177900) id 94%	(+177156-177923) id 94%	(+177139-177906) id 94%	(+177151-177918) id 94%	(-177905-177138)	(+1263978-1264745) id 94%	(-188523-187756)	(-187809-187042)	(-188831-188064)	(-195819-195052)	(-178793-178026)	(-202105-201338)	(-200841-200074)	(+1115543-1116310)	(-191900-191133)	(-204110-203343)	(+1118325-1119092)
	fliS	(+727029-727409) flagellar biosynthesis protein FliS	(+1082050-1082430) flagellar biosynthesis protein FliS	(+727027-727407) flagellar biosynthesis protein FliS	(+793562-793942) flagellar biosynthesis protein FliS	(+808557-808937) flagellar biosynthesis protein FliS	(-614555-614175) flagellar export chaperone FliS	(-599992-599612)	(-575298-574918)	(-534743-534363)	(+823654-824034)	(-580138-579758)	(+735588-735968)	(-561445-561065)	(+885186-885566)	(-632421-632041) id 98%	(+810834-811214)	(+808928-809308)	(+808984-809364)	(+808982-809362)	(+946662-947042)	(+946673-947053)	(+946677-947057)	(+946669-947049)	(+808998-809378)	(+814437-814815) id 97%	(+814690-815068) id 97%	(+814713-815091) id 97%	(+814940-815318) id 97%	(+814711-815089) id 97%	(+817110-817488) id 97%	(+814731-815109) id 97%	(+814698-815076) id 97%	(+814734-815112) id 97%	(+817110-817488) id 97%	(+814716-815094) id 97%	(+814713-815093)	(+233633-234011) id 97%	(-633985-633605)	(+812016-812396)	(+639334-639714)	(-619775-619395)	(+772913-773293)	(-629011-628631)	(-621901-621521)	(+700042-700422)	(+799165-799545)	(-628556-628176)	(+705567-705947)
	fliY	(+418563-419426) flagellar motor switch protein FliY	(-1255649-1256512) flagellar motor switch protein FliY blastn identity 91.20%	(+418566-419429) flagellar motor switch protein FliY	(+451936-452799) flagellar motor switch protein FliY	(-1092230-1091367) flagellar motor switch protein FliY	(+444819-445682) flagellar motor switch protein FliY	(+423270-424127)	(+377504-378367)	(-864084-863221)	(+479375-480232)	(+406400-407263)	(+424036-424884)	(+377473-378336)	(-1061937-1061074) mal annotated as FliN pero blastn id 94%	(-458664-457801) id 94%	(-1096497-1095634) mal annotated as flagellar motor switch protein FliN id 100%	(-1092606-1091743) mal annotated as flagellar motor switch protein FliN blastn id 100%	(-1092657-1091794) mal anotada like flagellar motor switch protein FliN blastn id 100%	(-1092651-1091788) mal annotated as flagellar motor switch protein FliN id 100%	(-1124696-1123833) mal annotated as flagellar motor switch protein FliN blastn id 95%	(-1124706-1123843) mal annotated as flagellar motor switch protein FliN id 95%	(-1124711-1123848) mal annotated as flagellar motor switch protein FliN id 95%	(-1124703-1123840) mal annotated as flagellar motor switch protein FliN id 95%	(-1094651-1093788) mal annotated as flagellar motor switch protein FliN id 100%	(-424869-424012) id 92%	(-424856-423999) id 92%	(-424867-424010) id 92%	(-425088-424231) id 92%	(-424867-424010) id 92%	(-424866-424009) id 92%	(-424877-424020) id 92%	(-424856-423999) id 92%	(-424884-424027) id 92%	(-424866-424009) id 92%	(-424875-424018) id 92%	(+424011-424868)	(-1511707-1510850) id 92%	(+432716-433579)	(+457785-458648)	(+458102-458965)	(+447240-448103)	(+425034-425897)	(+452434-453297)	(+441537-442400)	(-874504-873641)	(+442438-443301)	(+450607-451470)	(-880634-879771)
CYTOTOXINS	cag1	DELETION/pseudo (+1180595-1180621) blastn id 89%	(+821621-821968)	DELETION/pseudo (+1180581-1180607) id 89%	(+536578-536934)	(+547211-547558)	DELETION/pseudo (+1248894-1248920) id 89%	DELETION/pseudo (-1449880-1449858) id 91%	(-834961-834614)	(-780752-780405)	(+567112-567459)	DELETION/pseudo (+1462889-1462911) id 91%	DELETION/pseudo (-1303482-1303460) id 91%	(-809603-809256)	(+623915-624262)	(+885555-885902) id 96%	(+547378-547725)	(+547364-547711)	(+547373-547720)	(+547370-547717)	(-703088-702741)	(-703099-702752)	(-703103-702756)	(-703095-702748)	(+547386-547733)	(-548559-548212) id 97%	(-548543-548196) id 97%	(-548554-548207) id 97%	(-548780-548433) id 97%	(-548558-548211) id 97%	(-548557-548210) id 97%	(-548570-548223) id 97%	(-548545-548198) id 97%	(-548574-548227) id 97%	(-548556-548209) id 97%	(-548564-548217) id 97%	(+548209-548556)	(-1635398-1635051) id 97%	(-890169-889822) cag pathogenicity island protein id 97%	(+542462-542809) cag pathogenicity island protein id 96%	(-908749-908402) cag pathogenicity island protein id 96%	(-882428-882081) cag pathogenicity island protein id 96%	DELETION/pseudo (+1212087-1212113) id 89%	(-901401-901054) cag pathogenicity island protein id 96%	(-885979-885632) cag pathogenicity island protein id 96%	(+443920-444267) cag pathogenicity island protein id 96%	(+528651-528998) cag pathogenicity island protein id 96%	(-880740-880393) cag pathogenicity island protein id 96%	(+451869-452216) cag pathogenicity island protein id 96%
	cag2	DELETION/pseudo (+1011158-1011181) bastn id 92%	(+822076-822441) cag pathogenicity island protein id 100%	DELETION/pseudo (+1011144-1011167) id 92%	(+536950-537147) cag pathogenicity island protein id 100%	(+547666-547908) cag pathogenicity island protein epsilon id 98%	DELETION/pseudo (+137075-137104) id 83%	DELETION/pseudo (+1015201-1015230) id 87%	(-834506-834150) cag pathogenicity island protein id 92%	(-780297-779941) cag pathogenicity island protein id 100%	(+567602-568261) cag pathogenicity island protein id 96% blast sale like error pero si match en gbk	DELETION/pseudo (+970902-970924) id 91%	DELETION/pseudo (+693685-693705) id 95%	DELETION/pseudo (+809062-809124) id 89%	DELETION/pseudo (-624377-624326) id 94%	DELETION/pseudo (+885440 -885491 id 92%	DELETION/pseudo (+547833-548191) cag pathogenicity island protein frameshifted; no sequence id 98%	DELETION/pseudo (+547819-548177) cag pathogenicity island protein frameshifted; no sequence id 98%	DELETION/pseudo (+547828-548186) cag pathogenicity island protein frameshifted; no sequence id 93%	DELETION/pseudo (+547825-548183) cag pathogenicity island protein frameshifted; no sequence id 93%	(-702725-701973) hypothetical protein id 100%	(-702736-701984) hypothetical protein id 100%	(-702740-701988) hypothetical protein id 100%	(-702732-701980) hypothetical protein id 100%	DELETION/pseudo (+5547841-548199) cag pathogenicity island protein frameshifted; no sequence id 98%	(-549361-549271) id 96%	(-549344-549254) id 96%	(-549356-549266) id 96%	(-549582-549492) id 96%	(-549360-549270) id 96%	(-549359-549269) id 96%	(-549372-549282) id 96%	(-549347-549257) id 96%	(-549376-549286) id 96%	(-549358-549268) id 96%	(-549366-549276) id 96%	(+548699-549358) orf7 cag island protein id 97%	(-1636200-1636110) id 96%	DELETION/pseudo (+889707-889758) id 98%	DELETION/pseudo (-542924-542873) id 92%	DELETION/pseudo (+908287-908338) id 92%	DELETION/pseudo (+881966-882017) id 94%	DELETION/pseudo (+1049108-1049130) id 91%	DELETION/pseudo (+900939-900990) id 94%	DELETION/pseudo (+885517-885568) id 94%	DELETION/pseudo (-444382-444331) id 94%	DELETION/pseudo (-529113-529062) id 96%	DELETION/pseudo (+880278-880329) id 92%	DELETION/pseudo (-452331-452280) id 98%
	cag3	DELETION/pseudo (-398749-398725) blastn id 92%	(+822441-823886) sodium:calcium antiporter blastn id 95%	DELETION/pseudo (-398752-398728) id 92%	(+537162-538607) sodium:calcium antiporter id 94%	(+548017-549462) sodium:calcium antiporter id 98%	DELETION/pseudo (+1516841-1516868) id 89%	DELETION/pseudo (+760844-760869) id 88%	(-834157-832712) sodium:calcium antiporter id 95%	(-779948-778503) sodium:calcium antiporter id 94%	(+568254-569699) sodium:calcium antiporter id 94%	DELETION/pseudo (-1437750-1437723) id 89%	DELETION/pseudo (-583442-583415) id 86%	(-809069-807624) sodium:calcium antiporter id 95%	(+624491-625936) sodium:calcium antiporter id 95%	(+883882-885327) id 95%	(+548184-549629)	(+548170-549615)	(+548179-549624)	(+548176-549621)	(-701980-700535)	(-701991-700546)	(-701995-700550)	(-701987-700542)	(+548192-549637)	(-550799 549354) id 94%	(-550782-549337) id 94%	(-550794-549349) id 94%	(-551020-549575) id 94%	(-550798-549353) id 94%	(-550797-549352) id 94%	(-550810-549365) id 94%	(-550785-549340) id 94%	(-550814-549369) id 94%	(-550796-549351) id 94%	(-550804-549359) id 94%	(+549351-550796)	(-1637638-1636193) id 94%	(-889594-888149) cag pathogenicity island protein id 94%	(+543037-544482) cag pathogenicity island protein id 95%	(-908174-906729) cag pathogenicity island protein id 95%	(-881853-880408) cag pathogenicity island protein id 95%	DELETION/pseudo (+663610-663649) id 83%	(-900826-899381) cag pathogenicity island protein id 95%	(-885405-883960) cag pathogenicity island protein id 95%	(+444495-445940) cag pathogenicity island protein id 95%	(+529225-530670) cag pathogenicity island protein id 95%	(-880164-878719) cag pathogenicity island protein id 95%	(+452444-453889) cag pathogenicity island protein id 95%
	cag4	DELETION/pseudo (+264604-264636) blastn id 86%	(+823896-824405) sodium:calcium antiporter id 94%	DELETION/pseudo (+264607-264639) id 86%	(+538617-539126) sodium:calcium antiporter id 90%	(+549472-549981) sodium:calcium antiporter id 92%	DELETION/pseudo (+611309-611334) id 92%	DELETION/pseudo (+1200424-1200443) id 100%	(-832702-832193) sodium:calcium antiporter id 93%	(-778493-777984) sodium:calcium antiporter id 89%	(+569709-570218) sodium:calcium antiporter id 93%	DELETION/pseudo (+260132-260164) id 86%	DELETION/pseudo (-738832-738807) id 92%	(-807614-807105) sodium:calcium antiporter id 92%	(+625946-626455) sodium:calcium antiporter id 90%	(+883367-883872) id 89%	(+549639-550148) sodium:calcium antiporter id 92%	(+549625-550134) sodium:calcium antiporter id 92%	(+549634-550143) sodium:calcium antiporter id 92%	(+549631-550140) sodium:calcium antiporter id 92%	(-700525-700016) sodium:calcium antiporter id 100%	(-700536-700027) sodium:calcium antiporter id 100%	(-700540-700031) sodium:calcium antiporter id 100%	(-700532-700023) sodium:calcium antiporter id 100%	(+549647-550156) sodium:calcium antiporter id 92%	(-551318-550809) id 93%	(-551301-550792) id 93%	(-551313-550804) id 93%	(-551539-551030) id 93%	(-551317-550808) id 93%	(-551316-550807) id 93%	(-551329-550820) id 93%	(-551304-550795) id 93%	(-551333-550824) id 93%	(-551315-550806) id 93%	(-551323-550814) id 93%	(+550806-551315)	(-1638157-1637648) id 93%	(-888139-887630) cag pathogenicity island protein id 88%	(+544492-545001) cag pathogenicity island protein id 88%	(-906719-906210) cag pathogenicity island protein id 88%	(-880398-879889) cag pathogenicity island protein id 90%	DELETION/pseudo (+272280-272312) id 83%	(-899242-898862) cag pathogenicity island protein id 90%	(-883821-883441) cag pathogenicity island protein id 90%	(+445950-446459) cag pathogenicity island protein id 89%	(+530809-531189) cag pathogenicity island protein id 89%	(-880164-878719) cag pathogenicity island protein id 89%	(+454028-454408) cag pathogenicity island protein id 91%
	cag5	DELETION/pseudo (+1391315-1391334) blastn id 100%	(-826770-824524) sodium:calcium antiporter id 97%	DELETION/pseudo (+1391294-1391313) id 100%	(-541682-539436) sodium:calcium antiporter id 96%	(-552346-550100) sodium:calcium antiporter id 97%	DELETION/pseudo (+1491428-1491447) id 100%	DELETION/pseudo (+1449675-1449694) id 100%	(+829810-832056) sodium:calcium antiporter id 96%	(+775430-777676) sodium:calcium antiporter id 96%	(-572946-570700) sodium:calcium antiporter id 95%	DELETION/pseudo (-1199123-1199103) id 95%	DELETION/pseudo (+166100-166222) id 81%	(+804672-806918) sodium:calcium antiporter id 96%	(-629012-626766) sodium:calcium antiporter id 97%	(+880813-883059) id 96%	(-552513-550267) sodium:calcium antiporter id 97%	(-552499-550253) sodium:calcium antiporter id 97%	(-552508-550262) sodium:calcium antiporter id 97%	(-552505-550259) sodium:calcium antiporter id 97%	(+697290-699536) sodium:calcium antiporter id 100%	(+697301-699547) sodium:calcium antiporter id 100%	(+697305-699551) sodium:calcium antiporter id 100%	(+697297-699543) sodium:calcium antiporter id 100%	(-552521-550275) sodium:calcium antiporter id 97%	(-554012-551766) id 95%	(-553995-551749) id 95%	(-554007-551761) id 95%	(-554233-551987) id 95%	(-554011-551765) id 95%	(-554010-551764) id 95%	(-554023-551777) id 95%	(-553998-551752) id 95%	(-554027-551781) id 95%	(-554009-551763) id 95%	(-554017-551771) id 95%	(-554009-551763)	(-1640851-1638605) id 95%	(+885076-887322) CAG pathogenicity island protein 5 id 96%	(-547520-545274) cag pathogenicity island protein id 96%	(+903691-905937) cag pathogenicity island protein id 96%	(+877334-879580) cag pathogenicity island protein id 96%	DELETION/pseudo (+1165758-1165788) id 84%	(+896308-898554) cag pathogenicity island protein id 96%	(+880887-883133) cag pathogenicity island protein id 96%	(-449012-446766) cag pathogenicity island protein id 96%	(-533743-531497) cag pathogenicity island protein id 96%	(+875646-877892)	(-456962-454716)
	cagA	DELETION/pseudo (+253380-253413) blastn id 86%	(+854478-858023) cytochrome C oxidase subunit II id 91%	DELETION/pseudo (+253383-253416) id 86%	(+569075-572623) cytochrome C oxidase subunit II id 90%	(+579532-583092) cytochrome C oxidase subunit II id 92%	DELETION/pseudo (-937405-937379) id 93%	DELETION/pseudo (+1299438-1299469) id 88%	(-802951-799343) cytochrome C oxidase subunit II id 88%	(-749630-746100) cytochrome C oxidase subunit II id 88%	(+598836-602372) cytochrome C oxidase subunit II id 90%	DELETION/pseudo (+248219-248252) id 86%	DELETION/pseudo (+528183-528208) id 92%	(-780008-776445) cytochrome C oxidase subunit II id 89%	(+656679-660209) exotoxin CagA id 90%	(-853148-850741) id 92%	(+579930-583490)	(+579914-583473)	(+579967-583527)	(+579964-583524)	(+716818-720372)	(+716829-720383)	(+716833-720387)	(+716825-720379)	(+579979-583539)	(+581321-584860) id 91%	(+581305-584844) id 91%	(+581315-584854) id 91%	(+581542-585081) id 91%	(+581320-584859) id 91%	(+583718-587257) id 91%	(+581332-584871) id 91%	(+581306-584845) id 91%	(+581337-584876) id 91%	(+583716-587255) id 91%	(+581326-584865) id 91%	(+581318-584857) cytotoxin-associated protein A id 91%	(+239-3778) id 91%	(-858428-854715)	(+574906-578622)	(-875322-871801)	(-849983-846462)	(+510283-513324)	(-869005-865475)	(-851991-848461)	(+477654-481481)	(+562417-566136)	(-848870-845340)	(+485337-488870) cag pathogenicity island protein id 92%
	cagC	DELETION/pseudo (-1488615-1488595) blastn id 90%	(-853661-853314) sodium:calcium antiporter id 97%	DELETION/pseudo (-1488594-1488574) id 90%	(-568425-568078) sodium:calcium antiporter id 95%	(-578697-578350) id 97%	DELETION/pseudo (+469854-469876) id 92%	DELETION/pseudo (+81636-81651) id 100%	(+803688-804035) sodium:calcium antiporter id 97%	(+750306-750653) sodium:calcium antiporter id 95%	(-598031-597684) sodium:calcium antiporter id 95%	DELETION/pseudo (-288763-288729) id 83%	DELETION/pseudo (+1331392-1331424) id 78%	(+780805-781152) sodium:calcium antiporter id 94%	(-655887-655540) sodium:calcium antiporter id 96%	(+853898-854179) id 96%	(-579096-578749) sodium:calcium antiporter id 97%	(-579080-578733) sodium:calcium antiporter id 97%	(-579132-578785) sodium:calcium antiporter id 97%	(-579129-578782) sodium:calcium antiporter id 97%	(+671011-671358) sodium:calcium antiporter id 100%	(+671022-671369) sodium:calcium antiporter id 100%	(+671026-671373) sodium:calcium antiporter id 100%	(+671018-671365) sodium:calcium antiporter id 100%	(-579144-578797) sodium:calcium antiporter id 97%	(-580450-580169) id 93%	(-580433-580152) id 93%	(-580444-580163) id 93%	(-580671-580390) id 93%	(-580449-580168) id 93%	(-580449-580168) id 93%	(-580461-580180) id 92%	(-580435-580154) id 93%	(-580466-580185) id 93%	(-582845-582564) id 93%	(-580455-580174) id 93%	(-580513-580166) cag pathogenicity island protein (cag25) id 93%	(-1667289-1667008) id 93%	(+859074-859421)	(-574257-573910)	(+875982-876329)	(+850642-850989)	DELETION/pseudo (+595129-595150) id 91%	(+869652-869999)	(+852638-852985)	(-477007-476663)	(-561773-561429)	(+849515-849862)	(-484691-484344)
	cagD	DELETION/pseudo (-1110700-1110681) blastn id 100%	(-853312-852689) sodium:calcium antiporter id 97%	DELETION/pseudo (-1110686-1110667) id 100%	(-568076-567453) sodium:calcium antiporter id 94%	(-578348-577725) sodium:calcium antiporter id 97%	DELETION/pseudo (-1181368-1181349) id 100%	DELETION/pseudo (-1164895-1164876) id 100%	(+804037-804660) sodium:calcium antiporter id 95%	(+750655-751278) sodium:calcium antiporter id 96%	(-597682-597059) sodium:calcium antiporter id 97%	DELETION/pseudo (-1062719-1062700) id 100%	DELETION/pseudo (-1106967-1106948) id 100%	(+781154-781777) sodium:calcium antiporter id 95%	(-655538-654915) sodium:calcium antiporter id 97%	(+854163-854804) id 95%	(-578747-578124) sodium:calcium antiporter id 97%	(-578731-578108) sodium:calcium antiporter id 97%	(-578783-578160) sodium:calcium antiporter id 97%	(-578780-578157) sodium:calcium antiporter id 97%	(+671363-671986) sodium:calcium antiporter id 100%	(+671374-671997) sodium:calcium antiporter id 100%	(+671378-672001) sodium:calcium antiporter id 100%	(+671370-671993) sodium:calcium antiporter id 100%	(-578795-578172) sodium:calcium antiporter id 97%	(-580185-579544) id 96%	(-580168-579527) id 96%	(-580179-579539) id 96%	(-580406-579765) id 96%	(-580184-579543) id 96%	(-580184-579543) id 96%	(-580196-579555) id 96%	(-580170-579529) id 96%	(-580201-579560) id 96%	(-582580-581939) id 96%	(-580190-579549) id 96%	(-580164-579541) cag pathogenicity island protein D id 96%	(-1667024-1666383) id 96%	(+859423-860046) cag pathogenicity island protein id 95%	(-573908-573285) cag pathogenicity island protein id 95%	(+876331-876954) cag pathogenicity island protein id 95%	(+850991-851614) cag pathogenicity island protein id 94%	DELETION/pseudo (-1145541-1145522) id 100%	(+870001-870624) cag pathogenicity island protein id 94%	(+852987-853610) cag pathogenicity island protein id 94%	(-476661-476038) cag pathogenicity island protein id 95%	(-561427-560804) cag pathogenicity island protein id 94%	(+849864-850487) cag pathogenicity island protein id 95%	(-484342-483719) cag pathogenicity island protein id 94%
	cagE	DELETION/pseudo (+231239-231279) blastn id 86%	(-852680-849729) transporter id 98%	DELETION/pseudo (+231241-231281) id 86%	(-567444-564493) transporter id 97%	(-577716-574765) transporter id 99%	DELETION/pseudo (+51660-51685) id 92%	DELETION/pseudo (+50502-50527) id 96%	(+804669-807620) transporter id 98%	(+751287-754238) transporter id 97%	(-597050-594099) transporter id 97%	DELETION/pseudo (-299842-299821) id 95%	DELETION/pseudo (-361571-361540) id 84%	(+781786-784737) transporter id 97%	(-654906-651955) transporter id 97%	(+854819-857764) id 97%	(-578115-575164) CAG pathogenicity island protein 23 id 99%	(-578099-575148) CAG pathogenicity island protein 23 id 99%	(-578151-575200) CAG pathogenicity island protein 23 id 99%	(-578148-575197) CAG pathogenicity island protein 23 id 99%	(+671995-674946) VirB4 family type IV secretion/conjugal transfer ATPase id 100%	(+672006-674957) VirB4 family type IV secretion/conjugal transfer ATPase id 100%	(+672010-674961) VirB4 family type IV secretion/conjugal transfer ATPase id 100%	(+672002-674953) VirB4 family type IV secretion/conjugal transfer ATPase id 100%	(-578163-575212) CAG pathogenicity island protein 23 id 99%	(-579529-576584) id 97%	(-579512-576567) id 97%	(-579524-576579) id 97%	(-579750-576805) id 97%	(-579528-576583) id 97%	(-579528-576583) id 97%	(-579540-576595) id 97%	(-579514-576569) id 97%	(-579545-576600) id 97%	(-581924-579717) id 97%	(-579534-576589) id 97%	(-579526-576581) cag pathogenicity island protein (cag23) id 97%	(-1666368-1663423) id 97%	(+860055-863006) cag pathogenicity island protein id 97%	(-573278-570327) cag pathogenicity island protein id 97%	(+876963-879914) cag pathogenicity island protein id 97%	(+851623-854574) cag pathogenicity island protein id 97%	DELETION/pseudo (+1346861-1346885) id 92%	(+870633-873584) cag pathogenicity island protein id 98%	(+853617-856568) cag pathogenicity island protein id 97%	(-476029-473078) cag pathogenicity island protein id 97%	(-560795-557844) cag pathogenicity island protein id 97%	(+850496-853447) cag pathogenicity island protein id 97%	(-483710-480759) cag pathogenicity island protein id 97%
	cagF	DELETION/pseudo (+285021-285038) blastn id 100%	(-849727-848921) sodium:calcium antiporter id 97%	DELETION/pseudo (+285024-285041) id 100%	(-564491-563685) sodium:calcium antiporter id 98%	(-574763-573957) sodium:calcium antiporter id 96%	DELETION/pseudo (+1340015-1340033) id 100%	DELETION/pseudo (+287819-287836) id 100%	(+807622-808428) sodium:calcium antiporter id 97%	(+754240-755046) sodium:calcium antiporter id 97%	(-594097-593291) sodium:calcium antiporter id 97%	DELETION/pseudo (-814678-814657) id 95%	DELETION/pseudo (-170255-170218) id 82%	(+784739-785545) sodium:calcium antiporter id 97%	(-651953-651147) sodium:calcium antiporter id 97%	(+857766-858572) id 97%	(-575162-574356)	(-575146-574340)	(-575198-574392)	(-575195-574389)	(+674948-675754)	(+674959-675765)	(+674963-675769)	(+674955-675761)	(-575210-574404)	(-576582-575776) id 97%	(-576565-575759) id 97%	(-576577-575771) id 97%	(-576803-575997) id 97%	(-576581-575775) id 97%	(-576581-575775) id 97%	(-576593-575787) id 97%	(-576567-575761) id 97%	(-576598-575792) id 97%	(-576579-575773) id 97%	(-576587-575781) id 97%	(-576579-575773) id 97%	(-1663421-1662615) id 97%	(+863008-863814) cag pathogenicity island protein id 97%	(-570325-569519) cag pathogenicity island protein id 97%	(+879916-880722) cag pathogenicity island protein id 97%	(+854576-855382) cag pathogenicity island protein id 97%	DELETION/pseudo (+63738-63785) id 78%	(+873586-874392) cag pathogenicity island protein id 97%	(+856570-857376) cag pathogenicity island protein id 98%	(-473076-472270) cag pathogenicity island protein id 98%	(-557842-557036) cag pathogenicity island protein id 97%	(+853449-854255) cag pathogenicity island protein id 97%	(-480757-479951) cag pathogenicity island protein id 97%
	cagG	DELETION/pseudo (-468924-468899) blastn id 93%	(-848866-848438) sodium:calcium antiporter id 99%	DELETION/pseudo (-468922-468897) id 93%	(-563628-563200) sodium:calcium antiporter id 98%	(-573902-573474) sodium:calcium antiporter id 97%	DELETION/pseudo (-496809-496782) id 93%	DELETION/pseudo (-475258-475233) id 93%	(+808483-808914) sodium:calcium antiporter id 96%	(+755101-755532) sodium:calcium antiporter id 96%	(-593236-592808) sodium:calcium antiporter id 98%	DELETION/pseudo (-195508-195486) id 92%	DELETION/pseudo (+1023585-1023604) id 95%	(+785600-786031) sodium:calcium antiporter id 97%	(-651092-650664) sodium:calcium antiporter id 98%	(+858627-859055) id 98%	(-574301-573873) sodium:calcium antiporter id 97%	(-574285-573857) sodium:calcium antiporter id 97%	(-574337-573909) sodium:calcium antiporter id 97%	(-574334-573906) sodium:calcium antiporter id 97%	(+675809-676237) sodium:calcium antiporter id 100%	(+675820-676248) sodium:calcium antiporter id 100%	(+675824-676252) sodium:calcium antiporter id 100%	(+675816-676244) sodium:calcium antiporter id 100%	(-574349-573921) sodium:calcium antiporter id 97%	(-575721-575293) id 96%	(-575704-575276) id 96%	(-575716-575288) id 96%	(-575942-575514) id 96%	(-575720-575292) id 96%	(-575720-575292) id 96%	(-575732-575304) id 96%	(-575706-575278) id 96%	(-575737-575309) id 96%	(-575718-575290) id 96%	(-575726-575298) id 96%	(-575718-575290)	(-1662560-1662132) id 96%	(+863869-864300) cag pathogenicity island protein id 98%	(-569464-569033) cag pathogenicity island protein id 98%	(+880777-881208) cag pathogenicity island protein id 98%	(+855437-855865) cag pathogenicity island protein id 97%	DELETION/pseudo (-1479596-1479575) id 91%	(+874447-874599) cag pathogenicity island protein id 97%	(+857431-857859) cag pathogenicity island protein id 99%	(-472215-471787) cag pathogenicity island protein id 99%	(-556981-556550) cag pathogenicity island protein id 98%	(+854310-854741) cag pathogenicity island protein id 97%	(-479896-479465) cag pathogenicity island protein id 97%
	cagH	DELETION/pseudo (+520534-520554) blastn id 95%	(-848436-847324) sodium:calcium antiporter id 98%	DELETION/pseudo (+520532-520552) id 95%	(-563030-562086) sodium:calcium antiporter id 98%	(-573290-572346) sodium:calcium antiporter id 98%	DELETION/pseudo (+444917-444942) id 89%	DELETION/pseudo (-809030-809010) id 95%	(+809084-810028) sodium:calcium antiporter id 98%	(+755702-756646) sodium:calcium antiporter id 98%	(-592638-591694) sodium:calcium antiporter id 98%	DELETION/pseudo (-201245-201224) id 95%	DELETION/pseudo (+529821-529841) id 95%	(+786201-787145) sodium:calcium antiporter id 97%	(-650662-649550) sodium:calcium antiporter id 97%	(+859057-860169) id 97%	(-573857-572745) sodium:calcium antiporter id 98%	(-573841-572729) sodium:calcium antiporter id 98%	(-573893-572781) sodium:calcium antiporter id 98%	(-573890-572778) sodium:calcium antiporter id 98%	(+676239-677351) sodium:calcium antiporter id 100%	(+676250-677362) sodium:calcium antiporter id 100%	(+676254-677366) sodium:calcium antiporter id 100%	(+676246-677358) sodium:calcium antiporter id 100%	(-573905-572793) sodium:calcium antiporter id 98%	(-575277-574165) id 97%	(-575260-574148) id 97%	(-575272-574160) id 97%	(-575498-574386) id 97%	(-575276-574164) id 97%	(-575276-574164) id 97%	(-575288-574176) id 97%	(-575262-574150) id 97%	(-575293-574181) id 97%	(-575274-574162) id 97%	(-575282-574170) id 97%	(-575274-574162) cag pathogenicity island protein (cag20) id 97%	(-1662116-1661004) id 97%	(+864422-865414) cag pathogenicity island protein id 98%	(-568911-567919) cag pathogenicity island protein id 97%	(+881330-882322) cag pathogenicity island protein id 97%	(+855867-856979) cag pathogenicity island protein id 97%	DELETION/pseudo (+530625-530645) id 95%	(+875001-875993) cag pathogenicity island protein id 97%	(+857861-858973) cag pathogenicity island protein id 98%	(-471785-470673) cag pathogenicity island protein id 97%	(-556428-555436) cag pathogenicity island protein id 98%	(+854863-855855) cag pathogenicity island protein id 97%	(-479343-478351) cag pathogenicity island protein id 97%
	cagI	DELETION/pseudo (+127903-127931) blastn id 90%	(-847313-846168) sodium:calcium antiporter id 97%	DELETION/pseudo (+127903-127931) id 90%	(-562075-560930) sodium:calcium antiporter id 95%	DELETION/pseudo (-572335-571191) sodium:calcium antiporter; disrupted; no sequence id 99%	DELETION/pseudo (+153895-153923) id 90%	DELETION/pseudo (-143797-143773) id 92%	DELETION/pseudo (+810039-811183) sodium:calcium antiporter; disrupted; no sequence id 97%	(+756657-757802) sodium:calcium antiporter id 97%	(-591683-590538) sodium:calcium antiporter id 97%	DELETION/pseudo (-364050-364015) id 83%	DELETION/pseudo (-143800-143776) id 92%	(+787156-788301) sodium:calcium antiporter id 96%	(-649539-648394) sodium:calcium antiporter id 99%	(+860180-861325) id 96%	(-572734-571589) sodium:calcium antiporter id 99%	(-572718-571573) sodium:calcium antiporter id 99%	(-572770-571625) sodium:calcium antiporter id 99%	(-572767-571622) sodium:calcium antiporter id 99%	(+677362-678507) sodium:calcium antiporter id 100%	(+677373-678518) sodium:calcium antiporter id 100%	(+677377-678522) sodium:calcium antiporter id 100%	(+677369-678514) sodium:calcium antiporte id 100%	(-572782-571637) sodium:calcium antiporter id 99%	(-574154-573009) id 96%	(-574137-572992) id 96%	(-574149-573004) id 96%	(-574375-573230) id 96%	(-574153-573008) id 96%	(-574153-573007) id 96%	(-574165-573020) id 96%	(-574139-572994) id 96%	(-574170-573025) id 96%	(-574151-573006) id 96%	(-574159-573014) id 96%	(-574151-573006) cag pathogenicity island protein (cag19) id 96%	(-1660993-1659848) id 96%	(+865425-866570) cag pathogenicity island protein id 97%	(-567908-566763) cag pathogenicity island protein id 96%	(+882333-883478) cag pathogenicity island protein id 96%	(+856990-858135) cag pathogenicity island protein id 96%	DELETION/pseudo (-147887-147863) id 92%	(+876004-877149) cag pathogenicity island protein id 96%	(+858984-860129) cag pathogenicity island protein id 96%	(-470662-469517) cag pathogenicity island protein id 96%	(-555425-554280) cag pathogenicity island protein id 96%	(+855866-857011) cag pathogenicity island protein id 96%	(-478340-477195) cag pathogenicity island protein id 96%
	cagL	DELETION/pseudo (-1226407-1226382) blastn id 88%	(-846171-845458) sodium:calcium antiporter id 97%	DELETION/pseudo (-1226393-1226368) id 88%	(-560933-560220) sodium:calcium antiporter id 96%	(-571194-570481) sodium:calcium antiporter id 98%	DELETION/pseudo (+1423237-1423265) id 86%	DELETION/pseudo (+477645-477679) id 83%	(+811180-811887) sodium:calcium antiporter id 96%	(+757799-758512) sodium:calcium antiporter id 96%	(-590541-589828) sodium:calcium antiporter id 97%	DELETION/pseudo (-1172767-1172742) id 88%	DELETION/pseudo (-891230-891193) id 79%	(+788298-789011) sodium:calcium antiporter id 96%	(-648397-647684) sodium:calcium antiporter id 97%	(+861322-862033) id 97%	(-571592-570879) sodium:calcium antiporter id 98%	(-571576-570863) sodium:calcium antiporter id 98%	(-571628-570915) sodium:calcium antiporter id 98%	(-571625-570912) sodium:calcium antiporter id 98%	(+678504-679217) sodium:calcium antiporter id 100%	(+678515-679228) sodium:calcium antiporter id 100%	(+678519-679232) sodium:calcium antiporter id 100%	(+678511-679224) sodium:calcium antiporter id 100%	(-571640-570927) sodium:calcium antiporter id 98%	(-573012-572299) id 97%	(-572995-572282) id 97%	(-573007-572294) id 97%	(-573233-572520) id 97%	(-573011-572298) id 97%	(-573010-572297) id 97%	(-573023-572310) id 97%	(-572997-572284) id 97%	(-573028-572315) id 97%	(-573009-572296) id 97%	(-573017-572304) id 97%	(-573009-572296) cag pathogenicity island protein (cag18) id 97%	(-1659851-1659138) id 97%	(+866621-867280) cag pathogenicity island protein id 97%	(-566712-566053) cag pathogenicity island protein id 96%	(+883529-884188) cag pathogenicity island protein id 96%	(+858186-858845) cag pathogenicity island protein id 97%	DELETION/pseudo (-40497-40469) id 86%	(+877200-877859) cag pathogenicity island protein id 96%	(+860180-860839) cag pathogenicity island protein id 96%	(-469466-468807) cag pathogenicity island protein id 97%	(-554229-553570) cag pathogenicity island protein id 97%	(+857062-857721) cag pathogenicity island protein id 97%	(-477144-476485) cag pathogenicity island protein id 96%
	cagM	DELETION/pseudo (-69801-69772) blastn id 90%	(+843311-844441) sodium:calcium antiporter id 99%	DELETION/pseudo (-69798-69769) id 90%	(+558072-559202) sodium:calcium antiporter id 98%	(+568334-569464) sodium:calcium antiporter id 99%	DELETION/pseudo (-71703-71674) id 90%	DELETION/pseudo (-231788-231767) id 95%	(-814034-812904) sodium:calcium antiporter id 98%	(-760660-759530) sodium:calcium antiporter id 98%	(+587682-588812) sodium:calcium antiporter id 97%	DELETION/pseudo (-70026-69997) id 90%	DELETION/pseudo (-221869-221848) id 95%	(-791146-790016) sodium:calcium antiporter id 98%	(+645537-646667) sodium:calcium antiporter id 98%	(+863053-864183) id 98%	(+568732-569862)	(+568716-569846)	(+568768-569898)	(+568765-569895)	(-681364-680234)	(-681375-680245)	(-681379-680249)	(-681371-680241)	(+568780-569910)	(-571283-570153) id 97%	(-571266-570136) id 97%	(-571278-570148) id 97%	(-571504-570374) id 97%	(-571282-570152) id 97%	(-571281-570151) id 97%	(-571294-570164) id 97%	(-571268-570138) id 97%	(-571299-570169) id 97%	(-571280-570150) id 97%	(-571288-570158) id 97%	(+570150-571280) cag pathogenicity island protein (cag16) id 97%	(-1658122-1656992) id 97%	(-869383-868298) cag pathogenicity island protein id 98%	(+563950-565035) cag pathogenicity island protein id 97%	(-886291-885206) cag pathogenicity island protein id 97%	(-860948-859863) cag pathogenicity island protein id 98%	DELETION/pseudo (+133545-133565) id 95%	(-879960-878875) cag pathogenicity island protein id 98%	(-862941-861856) cag pathogenicity island protein id 98%	(+466704-467789) cag pathogenicity island protein id 98%	(+551467-552552) cag pathogenicity island protein id 98%	(-859824-858739) cag pathogenicity island protein id 98%	(+474382-475467) cag pathogenicity island protein id 97%
	cagN	DELETION/pseudo (+826435-826455) blastn id 95%	(+844456-845376) sodium:calcium antiporter id 97%	DELETION/pseudo (+826433-826453) id 95%	(+559217-560137) sodium:calcium antiporter d 97%	(+569479-570399) sodium:calcium antiporter id 98%	DELETION/pseudo (+1630695-1630716) id 95%	DELETION/pseudo (-851948-851921) id 89%	(-812889-811969) sodium:calcium antiporter id 97%	(-759515-758595) sodium:calcium antiporter id 97%	(+588827-589747) sodium:calcium antiporter id 97%	DELETION/pseudo (-574146-574123) id 92%	DELETION/pseudo (+995462-995480) id 100%	(-790001-789081) sodium:calcium antiporter id 96%	(+646682-647602) sodium:calcium antiporter id 97%	(+862118-863040) id 97%	(+569877-570797) sodium:calcium antiporter id 97%	(+569861-570781) sodium:calcium antiporter id 97%	(+569913-570833) sodium:calcium antiporter id 98%	(+569910-570830) sodium:calcium antiporter id 98%	(-680219-679299) sodium:calcium antiporter id 100%	(-680230-679310) sodium:calcium antiporter id 100%	(-680234-679314) sodium:calcium antiporter id 100%	(-680226-679306) sodium:calcium antiporter id 100%	(+569925-570845) sodium:calcium antiporter id 98%	(-572218-571294) id 96%	(-572201-571277) id 96%	(-572213-571289) id 96%	(-572439-571515) id 97%	(-572217-571293) id 96%	(-572216-571292) id 96%	(-572229-571305) id 96%	(-572203-571279) id 96%	(-572234-571310) id 96%	(-572215-571291) id 96%	(-572223-571299) id 96%	(+571295-572215)	(-1659057-1658133) id 96%	(-868283-867363) cag pathogenicity island protein id 97%	(+565050-565970) cag pathogenicity island protein id 97%	(-885191-884271) cag pathogenicity island protein id 97%	(-859848-858928) cag pathogenicity island protein id 97%	DELETION/pseudo (+778903-778926) id 92%	(-878860-877940) cag pathogenicity island protein id 98%	(-861841-860906) cag pathogenicity island protein id 97%	(+467804-468724) cag pathogenicity island protein id 98%	(+552567-553487) cag pathogenicity island protein id 97%	(-858724-857804) cag pathogenicity island protein id 97%	(+475482-476402) cag pathogenicity island protein id 97%
	cagP	DELETION/pseudo (-916297-916279) blastn id 95%	(+842888-842543) blastn id 98% (+841671-841976) cag pathogenicity island protein-	DELETION/pseudo (-916295-916277) id 95%	(-557648-557304) cag pathogenicity island protein id 98%	(-567910-567566) cag pathogenicity island protein id 97%	DELETION/pseudo (-228846-228831) id 100%	DELETION/pseudo (+891170-891185) id 100%	(+814456-814800) cag pathogenicity island protein id 97%	(+761083-761427) cag pathogenicity island protein id 99%	(-587248-586904) cag pathogenicity island protein id 97%	DELETION/pseudo (+983913-983928) id 100%	DELETION/pseudo (-232950-232929) id 91%	(+791461-791805) cag pathogenicity island protein id 97%	(-645113-644769) cag pathogenicity island protein id 99%	(+864607-864951) id 99%	(-568349-568005) cag pathogenicity island protein id 97%	(-568333-567989) cag pathogenicity island protein id 97%	(-568344-568000) cag pathogenicity island protein id 97%	(-568341-567997) cag pathogenicity island protein id 95%	(+681799-682131) cag pathogenicity island protein id 97%	(+681810-682142) cag pathogenicity island protein id 97%	(+681814-682146) cag pathogenicity island protein id 97%	(+681806-682138) cag pathogenicity island protein id 97%	(-568356-568012) cag pathogenicity island protein id 97%	(-569527-569202) id 98%	(-569510-569185) id 98%	(-569522-569197) id 98%	(-569748-569423) id 98%	(-569526-569201) id 98%	(-569525-569200) id 98%	(-569538-569213) id 98%	(-569512-569187) id 98%	(-569543-569218) id 98%	(-569524-569199) id 98%	(-569532-569207) id 98%	(-569536-569196) id 96%	(-1656366-1656041) id 98%	(+869851-870195) id 99%	(-563482-563138) id 99%	(+886759-887103) id 99%	(+861417-861761) id 99%	DELETION/pseudo (-1452963-1452942) id 91%	(+880430-880774) id 97%	(+863409-863753) id 99%	(-466236-465892) id 99%	(-550996-550652) id 99%	(+860292-860636) id 99%	(-473914-473570) id 99%
	cagQ	DELETION/pseudo (+678670-678686) blastn id 100%	(+841671-841976) cag pathogenicity island protein id 88%	DELETION/pseudo (+678668-678684) id 100%	(+556269-556574) cag pathogenicity island protein id 90%	(-567058-566753) cag pathogenicity island protein id 97%	DELETION/pseudo (-663691-663675) id 100%	DELETION/pseudo (-649178-649162) id 100%	(+815597-815902) cag pathogenicity island protein id 89%	(-762615-762310) cag pathogenicity island protein id 90%	(-586400-586095) cag pathogenicity island protein id 96%	DELETION/pseudo (-627307-627291) id 100%	DELETION/pseudo (-1099692-1099658) id 83%	(-792623-792318) cag pathogenicity island protein id 89%	(+643528-643908) cag pathogenicity island protein id 88%	(-866285-865915) id 90%	(-567572-567192) cag pathogenicity island protein id 97%	(-567556-567176) cag pathogenicity island protein id 97%	(-567567-567187) cag pathogenicity island protein id 97%	(-567564-567184) cag pathogenicity island protein id 97%	(+682564-682944) cag pathogenicity island protein id 100%	(+682575-682955) cag pathogenicity island protein id 100%	(+682579-682959) cag pathogenicity island protein id 100%	(+682571-682951) cag pathogenicity island protein id 100%	(-567579-567199) cag pathogenicity island protein id 97%	(-568768-568388) id 96%	(-568751-568371) id 96%	(-568763-568383) id 96%	(-568989-568609) id 96%	(-568767-568387) id 96%	(-568766-568386) id 96%	(-568779-568399) id 96%	(-568753-568373) id 96%	(-568784-568404) id 96%	(-568765-568385) id 96%	(-568773-568393) id 96%	(-568690-568385) cag pathogenicity island protein (cag14) id 96%	(-1655607-1655227) id 96%	(-871361-871056) cag pathogenicity island protein id 89%	(+561968-562273) cag pathogenicity island protein id 90%	(-888273-887968) cag pathogenicity island protein id 90%	(-862922-862617)	DELETION/pseudo (+704773-704813) id 79%	(-881939-881634) cag pathogenicity island protein id 89%	(-864940-864635) cag pathogenicity island protein id 89%	(+464726-465031) cag pathogenicity island protein id 89%	(+549493-549798) cag pathogenicity island protein id 89%	(-861810-861505) cag pathogenicity island protein id 90%	(+472400-472705) cag pathogenicity island protein id 90%
	cagS	DELETION/pseudo (+1536639-1536665) blastn id 93%	(-840774-840175) cag pathogenicity island protein id 98%	DELETION/pseudo (+1536618-1536644) id 93%	(-555392-554793) cag pathogenicity island protein id 97%	(-566327-565737) cag pathogenicity island protein id 97%	DELETION/pseudo (+1597851-1597877) id 93%	DELETION/pseudo (+1554248-1554274) id 93%	(+816835-817434) cag pathogenicity island protein id 98%	(+763531-764121) cag pathogenicity island protein id 98%	(-585670-585071) cag pathogenicity island protein id 96%	DELETION/pseudo (-455129-455106) id 96%	DELETION/pseudo (+1389569-1389599) id 88%	(+793088-793687) cag pathogenicity island protein id 97%	(-642720-642121) cag pathogenicity island protein id 98%	(+867103-867702) id 98%	(-566766-566176) CAG pathogenicity island protein 13 id 97%	(-566750-566160) CAG pathogenicity island protein 13 id 97%	(-566761-566171) CAG pathogenicity island protein 13 id 97%	(-566758-566168) CAG pathogenicity island protein 13 id 97%	(+683386-683985) cag pathogenicity island protein id 100%	(+683397-683996) cag pathogenicity island protein id 100%	(+683401-684000) cag pathogenicity island protein id 100%	(+683393-683992) cag pathogenicity island protein id 100%	(-566773-566183) CAG pathogenicity island protein 13 id 97%	(-567963-567364) id 97%	(-567946-567347) id 97%	(-567958-567359) id 97%	(-568184-567585) id 97%	(-567962-567363) id 97%	(-567961-567362) id 97%	(-567974-567375) id 97%	(-567948-567349) id 97%	(-567979-567380) id 97%	(-567960-567361) id 97%	(-567968-567369) id 97%	(-567948-567361)	(-1654802-1654203) id 97%	(+872256-872855) CAG pathogenicity island protein 13 id 98%	(-561063-560464) CAG pathogenicity island protein 13 id 98%	(+889178-889777) CAG pathogenicity island protein 13 id 98%	(+863813-864412)	DELETION/pseudo (+1502441-1502467) id 93%	(+882828-883427) CAG pathogenicity island protein 13 id 98%	(+865829-866428) CAG pathogenicity island protein 13 id 98%	(-463826-463227)	(-548608-548009)	(+862701-863300) CAG pathogenicity island protein S id 98%	(-471515-470916)
	cagT	DELETION/pseudo (+440497-440519) blastn id 91%	(+839136-839978) cag pathogenicity island protein id 99%	DELETION/pseudo (+440500-440522) id 100%	(+553749-554591) cag pathogenicity island protein id 97%	(+564684-565526) cag pathogenicity island protein id 98%	DELETION/pseudo (+466832-466854) id 91%	DELETION/pseudo (+445377-445407) id 84%	(-818477-817635) cag pathogenicity island protein id 98%	(-765144-764302) cag pathogenicity island protein id 98%	(+584024-584866) cag pathogenicity island protein id 96%	DELETION/pseudo (+427929-427959) id 84%	DELETION/pseudo (+845464-845519) id 75%	(-794731-793889) cag pathogenicity island protein id 96%	(+641077-641919) cag pathogenicity island protein id 97%	(+867904-868746) id 98%	(+565123-565965)	(+565107-565949)	(+565118-565960)	(+565115-565957)	(-685024-684182)	(-685035-684193)	(-685039-684197)	(-685031-684189)	(+565130-565972)	(-567162-566320) id 97%	(-567145-566303) id 97%	(-567157-566315) id 97%	(-567383-566541) id 97%	(-567161-566319) id 97%	(-567160-566318) id 97%	(-567173-566331) id 97%	(-567147-566305) id 97%	(-567178-566336) id 97%	(-567159-566317) id 97%	(-567167-566325) id 97%	(+566317-567159) cag pathogenicity island protein (cag12) id 97%	(-1654001-1653159) id 97%	(-873899-873057) cag pathogenicity island protein T id 98%	(+559418-560260) cag pathogenicity island protein T id 98%	(-890821-889979) cag pathogenicity island protein T id 98%	(-865456-864614) cag pathogenicity island protein T id 98%	DELETION/pseudo (+446801-446831) id 84%	(-884471-883629) cag pathogenicity island protein T id 98%	(-867472-866630) cag pathogenicity island protein T id 98%	(+462183-463025) cag pathogenicity island protein T id 98%	(+546965-547807) cag pathogenicity island protein T id 98%	(-864344-863502) cag pathogenicity island protein T id 98%	(+469871-470713) cag pathogenicity island protein T id 98%
	cagU	DELETION/pseudo (-68080-68058) blastn id 91%	(+838473-839123) cag pathogenicity island protein id 97%	DELETION/pseudo (-68077-68055) id 91%	(+553086-553733) cag pathogenicity island protein id 96%	(+563992-564648) cag pathogenicity island protein id 100%	DELETION/pseudo (-368485-368463) id 91%	DELETION/pseudo (-68530-68508) id 91%	(-819140-818490) cag pathogenicity island protein id 97%	(-765807-765160) cag pathogenicity island protein id 96%	(+583332-583988) cag pathogenicity island protein id 97%	DELETION/pseudo (+207966-207982) id 100%	DELETION/pseudo (+593193-593245) id 77%	(-795394-794747) cag pathogenicity island protein id 96%	(+640414-641064) cag pathogenicity island protein id 97%	(+868759-869409) id 96%	(+564431-565087) cag pathogenicity island protein id 100%	(+564415-565071) cag pathogenicity island protein id 100%	(+564426-565082) cag pathogenicity island protein id 100%	(+564423-565079) cag pathogenicity island protein id 100%	(-685687-685037) cag pathogenicity island protein id 100%	(-685698-685048) cag pathogenicity island protein id 100%	(-685702-685052) cag pathogenicity island protein id 100%	(-685694-685044) cag pathogenicity island protein id 100%	(+564438-565094) cag pathogenicity island protein id 100%	(-566270-565628) id 97%	(-566253-565611) id 97%	(-566265-565623) id 97%	(-566491-565849) id 97%	(-566269-565627) id 97%	(-566268-565626) id 97%	(-566281-565639) id 97%	(-566255-565613) id 97%	(-566286-565644) id 97%	(-566267-565625) id 97%	(-566275-565633) id 97%	(+565625-566281) cag pathogenicity island protein (cag11) id 97%	(-1653109-1652467) id 97%	(-874562-873912) cag pathogenicity island protein id 96%	(+558755-559402) cag pathogenicity island protein id 97%	(-891484-890837) cag pathogenicity island protein id 96%	(-866119-865472) cag pathogenicity island protein id 96%	DELETION/pseudo (-1527198-1527145) id 76%	(-885134-884487) cag pathogenicity island protein id 96%	(-868135-867488) cag pathogenicity island protein id 96%	(+461520-462167) cag pathogenicity island protein id 96%	(+546302-546949) cag pathogenicity island protein id 96%	(-865007-864360) cag pathogenicity island protein id 96%	(+469208-469855) cag pathogenicity island protein id 96%
	cagV	DELETION/pseudo (-378537-378514) blastn id 92%	(-838076-837318) cag pathogenicity island protein id 97%	DELETION/pseudo (-378540-378517) id 92%	(-552814-552056) cag pathogenicity island protein id 97%	(-563606-562848) cag pathogenicity island protein id 98%	DELETION/pseudo (+1361600-1361632) id 88%	DELETION/pseudo (+1533231-1533254) id 92%	(+819522-820280) cag pathogenicity island protein id 98%	(+766076-766834) cag pathogenicity island protein id 97%	(-582935-582177) cag pathogenicity island protein id 98%	DELETION/pseudo (-1381938-1381915) id 92%	DELETION/pseudo (+424822-424842) id 95%	(+795612-796370) cag pathogenicity island protein id 97%	(-640151-639393) virB8 family protein id 98%	(+869673-870431) id 98%	(-564045-563287) virB8 family protein id 98%	(-564029-563271) virB8 family protein id 78%	(-564040-563282) virB8 family protein id 98%	(-564037-563279) virB8 family protein id 98%	(+686074-686832) virB8 family protein id 100%	(+686085-686843) virB8 family protein id 100%	(+686089-686847) virB8 family protein id 100%	(+686081-686839) virB8 family protein id 100%	(-564052-563294) virB8 family protein id 98%	(-565247-564498) id 98%	(-565230-564481) id 98%	(-565242-564493) id 98%	(-565468-564719) id 98%	(-565246-564497) id 98%	(-565245-564496) id 98%	(-565258-564509) id 98%	(-565232-564483) id 98%	(-565263-564514) id 98%	(-565244-564495) id 98%	(-565252-564503) id 98%	(-565244-564486) cag pathogenicity island protein (cag10) id 98%	(-1652086-1651337) id 98%	(+874836-875594) cag pathogenicity island protein id 97%	(-558485-557727) cag pathogenicity island protein id 98%	(+891754-892512) cag pathogenicity island protein id 98%	(+866394-867152) cag pathogenicity island protein id 98%	DELETION/pseudo (+1480325-1480348) id 92%	(+885411-886169) cag pathogenicity island protein id 97%	(+868409-869167) cag pathogenicity island protein id 97%	(-461248-460490) cag pathogenicity island protein id 97%	(-546026-545268) cag pathogenicity island protein id 98%	(+865277-866035) cag pathogenicity island protein id 98%	(-468939-468181) cag pathogenicity island protein id 98%
	cagW	DELETION/pseudo (+1019765-1019782) blastn id 100%	(-837313-835706) cag pathogenicity island protein id 98%	DELETION/pseudo (+1019751-1019768) id 100%	(-552051-550444) cag pathogenicity island protein id 98%	(-562843-561236) cag pathogenicity island protein id 99%	DELETION/pseudo (+368109-368140) id 84%	DELETION/pseudo (-1616106-1616072) id 83%	(+820285-821892) cag pathogenicity island protein id 98%	(+766839-768446) cag pathogenicity island protein id 98%	(-582172-580565) cag pathogenicity island protein id 98%	DELETION/pseudo (+979572-979589) id 100%	DELETION/pseudo (-1290278-1290172) id 76%	(+796375-797982) cag pathogenicity island protein id 97%	(-639388-637781) cag pathogenicity island protein id 98%	(+870448-872043) id 97%	(-563282-561675) cag pathogenicity island protein id 99%	(-563266-561659) cag pathogenicity island protein id 99%	(-563277-561670) cag pathogenicity island protein id 99%	(-563274-561667) cag pathogenicity island protein id 99%	(+686837-688435) cag pathogenicity island protein id 100%	(+686848-688446) cag pathogenicity island protein id 100%	(+686852-688450) cag pathogenicity island protein id 100%	(+686844-688442) cag pathogenicity island protein id 100%	(-563289-561682) cag pathogenicity island protein id 99%	(-564472-562877) id 98%	(-564455-562860) id 98%	(-564467-562872) id 97%	(-564693-563098) id 98%	(-564471-562876) id 98%	(-564470-562875) id 98%	(-564483-562888) id 98%	(-564457-562862) id 98%	(-564488-562893) id 98%	(-564469-562874) id 98%	(-564477-562882) id 98%	(-564481-562874) cag pathogenicity island protein (cag9) id 98%	(-1651311-1649716) id 98%	(+875599-877206) cag pathogenicity island protein id 98%	(-557722-556115) cag pathogenicity island protein id 98%	(+892643-894118) cag pathogenicity island protein id 97%	(+867283-868764) cag pathogenicity island protein id 97%	DELETION/pseudo (+710880-710906) id 93%	(+886174-887781) cag pathogenicity island protein id 97%	(+869298-870779) cag pathogenicity island protein id 98%	(-460359-458878) cag pathogenicity island protein id 98%	(-545263-543656) cag pathogenicity island protein id 97%	(+866040-867647) cag pathogenicity island protein id 98%	(-468176-466569) cag pathogenicity island protein id 98%
	cagX	DELETION/pseudo (-41533-41499) blastn id 86%	(-835653-834085) sodium:calcium antiporter id 99%	DELETION/pseudo (-41530-41496) id 86%	(-550391-548826) sodium:calcium antiporter id 98%	(-561183-559615) sodium:calcium antiporter id 98%	DELETION/pseudo (-42244-42210) id 83%	DELETION/pseudo (-548754-548734) id 95%	(+821945-823510) sodium:calcium antiporter id 98%	(+768499-770067) sodium:calcium antiporter id 97%	(-580512-578947) sodium:calcium antiporter id 97%	DELETION/pseudo (-1323719-1323682) id 82%	DELETION/pseudo (+1516653-1516688) id 83%	(+798035-799603) sodium:calcium antiporter id 98%	(-637728-636163) sodium:calcium antiporterid 98%	(+872096-873664) id 98%	(-561622-560054)	(-561606-560040)	(-561617-560049)	(-561614-560046)	(+688488-690056)	(+688499-690067)	(+688503-690071)	(+688495-690063)	(-561629-560061)	(-562824-561259) id 97%	(-562807-561242) id 97%	(-562819-561254) id 97%	(-563045-561480) id 97%	(-562823-561258) id 97%	(-562822-561257) id 97%	(-562835-561270) id 97%	(-562809-561244) id 97%	(-562840-561275) id 97%	(-562821-561256) id 97%	(-562829-561264) id 97%	(-562821-561256) cag pathogenicity island protein X id 97%	(-1649663-1648098) id 97%	(+877259-878827) cag pathogenicity island protein id 97%	(-556062-554497) cag pathogenicity island protein id 98%	(+894171-895739) cag pathogenicity island protein id 98%	(+868817-870382) cag pathogenicity island protein id 98%	DELETION/pseudo (+1332769-1332794) id 88%	(+887834-889399) cag pathogenicity island protein id 98%	(+870832-872397) cag pathogenicity island protein id 98%	(-458826-457261) cag pathogenicity island protein id 98%	(-543603-542038) cag pathogenicity island protein id 98%	(+867700-869265) cag pathogenicity island protein id 98%	(-466517-464952) cag pathogenicity island protein id 98%
	cagY	DELETION/pseudo (+149545-149577) blastn id 91%	(-834070-828512) hypothetical protein id 96%	DELETION/pseudo (+149545-149577) id 91%	(-548811-543424) hypothetical protein id 96%	DELETION/pseudo (-559600-554089) hypothetical protein; disrupted; no sequence id 95%	DELETION/pseudo (+175484-175516) id 91%	DELETION/pseudo (+153152-153184) id 91%	DELETION/pseudo (+823525-828067) hypothetical protein; disrupted; no sequence id 97%	DELETION/pseudo (+770082-773687) cag pathogenicity island protein; disrupted; no sequence id 98%	DELETION/pseudo (-578932-574687) cag pathogenicity island protein; disrupted; no sequence id 86%	DELETION/pseudo (+147841-147873) id 91%	DELETION/pseudo (+937785-937949) id 80%	DELETION/pseudo (+799618-802930) hypothetical protein; disrupted; no sequence id 95%	(-636148-630755) sodium:calcium antiporter id 95%	(+876331-879071) id 96%	(-560039-554256)	(-560025-554242)	(-560034-554251)	(-560031-554248)	(+690071-695536) cag pathogenicity island protein id 100%	(+690082-695547) cag pathogenicity island protein id 100%	(+690086-695551) cag pathogenicity island protein id 100%	(+690078-695543) cag pathogenicity island protein id 100%	(-560046-554264)	(-557621-555754) id 96%	(-557604-555737) id 96%	(-557616-555749) id 96%	(-557842-555975) id 96%	(-557620-555753) id 96%	(-557619-555752) id 96%	(-557632-555765) id 96%	(-557607-555740) id 96%	(-557636-555769) id 96%	(-557618-555751) id 96%	(-557626-555759) id 96%	(-561241-555749)	(-1644460-1642593) id 96%	(+880899-883334) cag7a (+878842-880929) cag7b blastn id 97%	(-551866-549263) cag7a blastn id 97% dividido por gaps	(+895754-901948) cag7a blastn id 91% dividido por gaps	(+870397-875592) cag7a blastn id 98% dividido por gaps	DELETION/pseudo (+157229-157261) id 91%	(+891435-894566) cag7a grupo dividido por gaps (+889414-891414) cag7b blastn (+892548 -894566) id 98%	(+872412-877178) cag7b (+877187-879145) cag pathogenicity island protein blastn (+877127-879145) id 98%	(-452700-450754) cag pathogenicity island protein id 98%	(-538520-535485) cag7a dividido por gaps (-537496- 535485) blastn id 98%	(+869280-871499) cag7b (+871520-873904) cag7a (+871452-873904) blastn id 97%	(-460620-458704) cag pathogenicity island protein blastn id 98%
	cagZ	DELETION/pseudo (+1013458-1013486) blastn id 86%	(-828375-827776) sodium:calcium antiporter id 98%	DELETION/pseudo (+1013444-1013472) id 86%	(-543287-542688) sodium:calcium antiporter id 98%	(-553951-553352) sodium:calcium antiporter id 99%	DELETION/pseudo (-1150247-1150225) id 91%	DELETION/pseudo (-109532-109506) id 85%	(+828205-828804) sodium:calcium antiporter id 98%	(+773825-774424) sodium:calcium antiporter id 98%	(-574552-573953) sodium:calcium antiporter id 97%	DELETION/pseudo (-433027-432992) id 79%	DELETION/pseudo (+551516-551533) id 100%	(+803067-803666) sodium:calcium antiporter id 98%	(-630617-630018) sodium:calcium antiporter id 98%	(+879208-879807) id 98%	(-554118-553519) sodium:calcium antiporter id 99%	(-554104-553505) sodium:calcium antiporter id 99%	(-554113-553514) sodium:calcium antiporter id 99%	(-554110-553511) sodium:calcium antiporter id 99%	(+695685-696284) sodium:calcium antiporter id 100%	(+695696-696295) sodium:calcium antiporter id 100%	(+695700-696299) sodium:calcium antiporter id 100%	(+695692-696291) sodium:calcium antiporter id 100%	(-554126-553527) sodium:calcium antiporter id 99%	(-555617-555018) id 97%	(-555600-555001) id 97%	(-555612-555013) id 97%	(-555838-555239) id 97%	(-555616-555017) id 97%	(-555615-555016) id 97%	(-555628-555029) id 97%	(-555603-555004) id 97%	(-555632-555033) id 97%	(-555614-555015) id 97%	(-555622-555023) id 97%	(-555614-555015) cag pathogenicity island protein (cag6) id 97%	(-1642456-1641857) id 97%	(+883471-884070) id 99%	(-549125-548526) cag pathogenicity island protein id 97%	(+902086-902685) cag pathogenicity island protein id 97%	(+875729-876328) cag pathogenicity island protein id 97%	DELETION/pseudo (-1483465-1483445) id 95%	(+894703-895302) cag pathogenicity island protein id 98%	(+879282-879881) cag pathogenicity island protein id 98%	(-450617-450018) cag pathogenicity island protein id 98%	(-535348-534749) cag pathogenicity island protein id 97%	(+874041-874640) cag pathogenicity island protein id 98%	(-458567-457968) cag pathogenicity island protein id 98%
	virB11	(-1366633-1365719) like virB11-1 annotated as conjugal transfer protein TrbB id 95% (+1485863-1486807) like virB11-3 annotated as conjugal transfer protein TrbB id 97%	(+250138-251052) like virB11-1 annotated as conjugal transfer protein TrbB id 96% (-827771-826779) like virB11-35A annotated as hypothetical protein id 98% and virB11-4 id 98%	(-1366612-1365698) like virB11-1 annotated as conjugal transfer protein TrbB id 95% similar to virB11-2 (-1365961-1365873) id 74%, (+1485842-1486786) like virB11-3 annotated as conjugal transfer protein TrbB id 97% similar to virB11-4 (+1486284-1486383) id 72% and a virB11-35A (+1486284-1486348) id 79%	(-1384661-1383747) like virB-1 annotated as conjugal transfer protein TrbB id 95% (-542683-541691) hypothetical protein like virB11-35A id 99% and virB11-4 id 97%	(-1491398-1490484) like virB11-1 annotated as conjugal transfer protein TrbB id 96% (-553347-552355) like virB11-35A annotated as hypothetical protein id 97% similar to virB11-4 id 100%	(-1466435-1465521) like virB11-1 annotated as conjugal transfer protein TrbB id 96% (+1006784-1007728) like virB11-3 annotated as conjugal transfer protein TrbB id 99%	(-1424762-1423848) like virB11-1 annotated as conjugal transfer protein TrbB id 96% and DELETION/pseudo (-1424111-1424023) like virB11-2 id 74% DELETION/pseudo (+1424038-1424708) like virB11-3 id 65% DELETION/pseudo (-68190-68148) virB11-35A id 78% and virB11-4 id 80%	(+1486903-1487817) like virB11-1 annotated as conjugal transfer protein TrbB id 95% DELETION/pseudo (+1487554-1487642) like virB11-2 id 73% DELETION/pseudo (-1487642-1486957) like virB11-3 id 65%, (+828809-829801) like virB11-35A annotated as hypothetical protein id 98% and virB11-4 id 98%	(-1334463-1333549) like virB11-1 annotated as conjugal transfer protein TrbB id 95% and virB11-3 id 65% DELETION/pseudo (-1236323-1235381) like virB11-2 annotated as ATPase; disrupted; no sequence id 96% (+774429-775421) like virB11-35A annotated as hypothetical protein id 100% and virB11-4 id 97%	(+1568876-1569790) like virB11-1 annotated as conjugal transfer protein TrbB id 96% (+1071087-1071386) like virB11-2 annotated as hypothetical protein id 98% (+1638919-1639863) like virB11-3 annotated as conjugal transfer protein TrbB id 99% (-573860-572955) hypothetical protein like id 97% and virB11-4 id 97%	(+1484256-1485170) like virB11-1 annotated as conjugal transfer protein TrbB id 94% las demás no están error en blastn like si fueran pseudogenes	(+1488138-1489052) like virB11-1 annotated as conjugal transfer protein TrbB id 92% las demás no están error en blastn like si fueran pseudogenes	(+1516710-1517624) like virB11-1 annotated as conjugal transfer protein TrbB id 94% and virB11-3 id 66%(+803671-804663) like virB11-35A annotated as hypothetical protein id 98% and virB11-4 id 97% DELETION/pseudo (+512180-512200) like virB11-2 id 100%	(+116680-117594) like virB11-1 annotated as conjugal transfer protein TrbB id 95% (-630013-629021) like virB11-35A anotada P-type DNA transfer ATPase VirB11 id 98% and virB11-4 id 98% DELETION/pseudo (+117361-117421) like virB11-2 id 80% (-117421-116734) like virB11-3 id 65%	(-1390366-1389452) like virB11-1 id 95% (+879812-880804) like virB11-35A id 99% and virB11-4 id 97% DELETION/pseudo (-1389715-1389627) like virB11-2 id 73% (+1389627-1390312) like virB11-3 id 65%	(-1497178-1496264) like virB11-1 annotated as conjugal transfer protein TrbB id 96% (-553514-552522) like virB11-35A annotated as P-type DNA transfer ATPase VirB11 id 97% and virB11-4 id 100% DELETION/pseudo (+117361-117421) like virB11-2 id 80% and virB11-3 id 65%	(-1493280-1492366) like virB11-1 annotated as conjugal transfer protein TrbB id 96% (-553500-552508) like virB11-35A annotated as P-type DNA transfer ATPase VirB11 id 97% and virB11-4 id 100% DELETION/pseudo (-1492599-1492541) like virB11-2 id 78% and virB11-3 id 65%	(-1492869-1491955) like virB11-1 annotated as conjugal transfer protein TrbB id 96% (-553509-552517) like virB11-35A annotated as P-type DNA transfer ATPase VirB11 id 97% and virB11-4 id 100% DELETION/pseudo (-1492188-1492130) like virB11-2 id 78% (+1492130-1492815) like virB11-3 id 65%	(-1493133-1492219) like virB11-1 annotated as conjugal transfer protein TrbB id 96% (-553506-552514) like virB11-35A annotated as P-type DNA transfer ATPase VirB11 id 97% and virB11-4 id 100% DELETION/pseudo (-1492452-1492394) virB11-2 id 78% (+1492394-1493079) virB11-3 id 65%	(+117193-118107) like virB11-1 annotated as conjugal transfer protein TrbB id 100% (+464923-465864) like virB11-2 annotated as ATPase id 100% (-514418-513474) like vacA3 annotated as conjugal transfer protein TrbB id 100% (+696289-697281) like virB11-35A annotated as P-type DNA transfer ATPase VirB11 id 97% and virB11-4 id 100%	(+117194-118108) like virB11-1 annotated as conjugal transfer protein TrbB id 100% (+464933-465874) like virB11-2 annotated as ATPase id 100% (-514428-513484) like virB11-3 annotated as conjugal transfer protein TrbB id 100% (+696300-697292) like virB11-35A annotated as P-type DNA transfer ATPase VirB11 id 97% and virB11-4 id 100%	(+117193-118107) like virB11-1 annotated as conjugal transfer protein TrbB id 100% (+464937-465878) like virB11-2 annotated as ATPase id 100% (-514432-513488) like virB11-3 annotated as conjugal transfer protein TrbB id 100% (+696304-697296) like virB11-35A annotated as P-type DNA transfer ATPase VirB11 id 97% and virB11-4 id 100%	(+117192-118106) like virB11-1 annotated as conjugal transfer protein TrbB id 100% (+464929-465870) like virB11-2 annotated as ATPase id 100% (-514424-513480) like virB11-3 annotated as conjugal transfer protein TrbB id 100% (+696296-697288) like virB11-35A annotated as P-type DNA transfer ATPase VirB11 id 97% and virB11-4 id 100%	(-1495134-1494220) like virB11-1 annotated as conjugal transfer protein TrbB id 96% (-553522-552530) like virB11-35A annotated as P-type DNA transfer ATPase VirB11 id 97% and virB11-4 id 100% DELETION/pseudo (-1494453-1494395) virB11-2 id 78% (+1494395-1495080) virB11-3 id 65%	(-1095436-1094522) like virB11-1 id 95% (+493835-494691) like virB11-3 id 99% (-555013-554021) like virB11-35A id 96% and virB11-4 id 97% DELETION/pseudo (-494295-493933) like virB11-2 id 67%	(-1095699-1094785) like virB11-1 id 95% (+493819-494675) like virB11-3 id 99% (-554996-554004) like virB11-35A id 96% and virB11-4 id 97% DELETION/pseudo (-494279-493917) like virB11-2 id 67%	(-1095722-1094808) like virB11-1 id 95% (+493831-494687) like virB11-3 id 99% (-555008-554016) like virB11-35A id 96% and virB11-4 id 97% DELETION/pseudo (-494291-493929) like virB11-2 id 67%	(-1095984-1095070) like virB11-1 id 95% (+494055-494911) like virB11-3 id 99% (-555234-554242) like virB11-35A id 96% and virB11-4 id 97% DELETION/pseudo (-494515-494153) like virB11-2 id 67%	(-1095709-1094795) like virB11-1 id 95% (+493833-494689) like virB11-3 id 99% (-555012-554020) like virB11-35A id 96% and virB11-4 id 97% DELETION/pseudo (-494293-493931) like virB11-2 id 67%	(-1098205-1097291) like virB11-1 id 95% (+493832-494688) like virB11-3 id 99% (-555011- 554019) like virB11-35A id 96% and virB11-4 id 97% DELETION/pseudo (-494292-493930) like virB11-2 id 67%	(-1095755-1094841) like virB11-1 id 95% (+493844-494700) like virB11-3 id 99% (-555024-554032) like virB11-35A id 96% and virB11-4 id 97% DELETION/pseudo (-494304-493942) like virB11-2 id 67%	(-1095708-1094794) like virB11-1 id 95% (+493822-494678) like virB11-3 id 99% (-554999-554007) like virB11-35A id 96% and virB11-4 id 97% DELETION/pseudo (-494282-493920) like virB11-2 id 67%	(-1095752-1094838) like virB11-1 id 95% (+493850-494706) like virB11-3 id 99% (-555028-554036) like virB11-35A id 96% and virB11-4 id 97% DELETION/pseudo (-494310-493948) like virB11-2 id 67%	(-1098131-1097217) like virB11-1 id 95% (+493832-494688) like virB11-3 id 99% (-555010-554018) like virB11-35A id 96% and virB11-4 id 97% DELETION/pseudo (-494292-493930) like virB11-2 id 67%	(-1095707-1094793) like virB11-1 id 95% (+493840-494696) like virB11-3 id 99% (-555018-554026) like virB11-35A id 96% and virB11-4 id 97% DELETION/pseudo (-494300-493938) like virB11-2 id 67%	(-1095709-1094795) like virB11-1 annotated as virB11 protein id 95% (-555010-554018) like virB11-35A annotated as virB11-like protein id 96% and virB11-4 id 97% (-494688-493804) like virB11-3 annotated as VirB11 type IV secretion ATPase id 99% DELETION/pseudo (-494292-493930) virB11-2 id 67%	(-514637-513723) like virB11-1 id 95% (+1580673-1581529) like virB11-3 id 99% (-1641852-1640860) like virB11-35A id 96% and virB11-4 id 97% DELETION/pseudo (-1581133-1580771) like virB11-2 id 67%	(-1406684-1405770) like virB11-1 annotated as withjugative transfer regulon protein id 95% (+884075-885067) like virB11-35A annotated as virB11-2 and cag pathogenicity island protein id 99% and virB11-4 id 98% DELETION/pseudo (-1406003-1406003) like virB11-2 id 78% (+1405945-1406630) like virB11-3 id 65%	(-1416005-1415091) like virB11-1 annotated as withjugative transfer regulon protein id 96% (-548521-547529) like virB11-35A virB11-2 and cag pathogenicity island protein annotated as id 99% and virB11-4 id 98% DELETION/pseudo (-1415354-1415266) like virB11-2 id 73% (+1415266-1415951) like virB11-3 id 65%	(-1425889-1424975) like virB11-1 annotated as withjugative transfer regulon protein id 95% (+902690-903682) like virB11-35A annotated as virB11-2 cag pathogenicity island protein id 99% and vacA4 id 98% DELETION/pseudo (-1425238-1425150) like virB11-2 id 72% (+1425150-1425835) like virB11-3 id 66%	(-1389886-1388972) like virB11-1 annotated as withjugative transfer regulon protein id 95% (+876333-877325) like virB11-35A annotated as virB11-2 cag pathogenicity island protein 99% and virB11-4 id 97% DELETION/pseudo (-1389235-1389147) like virB11-2 id 71% (+1389147-1389832) like virB11-3 id 65%	(-1375998-1375084) like virB11-1 annotated as withjugative transfer regulon protein id 95% (+713665-714606) like virB11-2 annotated as type IV secretion system ATPase id 96% DELETION/pseudo (+1375259-1375944) like virB11-3 id 65% (+705854-705886) like virB11-35A annotated as id 88% and vacA4 id 88%	(-1444419-1443505) like virB11-1 annotated as withjugative transfer regulon protein id 95% (-1429952-1429326) like virB11-2 annotated as type IV secretion system ATPase id 96% (+895307-896299) like virB11-35A annotated as virB11-2 cag pathogenicity island protein id 99% and virB11-4 id 97% DELETION/pseudo (+1443680-1444365) like virB11-3 id 66%	(-1395725-1394811) like virB11-1 annotated as withjugative transfer regulon protein id 95% (+879886-880878) like virB11-35A annotated as virB11-2 cag pathogenicity island protein id 99% and virB11-4 id 97% DELETION/pseudo (-1395074-1394986) like virB11-2 id 73% (+1394986-1395671) like virB11-3 id 66%	(-1377025-1376111) like virB11-1 annotated as withjugative transfer regulon protein id 96% (-450013-449021) like virB11-35A annotated as virB11-2 cag pathogenicity island protein id 100% and virB11-4 id 97% DELETION/pseudo (-1376374-1376286) like virB11-2 id 74% (+1376301-1376971) like virB11-3 id 65%	(-1408648-1407734) like virB11-1 annotated as withjugative transfer regulon protein id 95% (-534744-533752) like virB11-35A annotated as virB11-2 cag pathogenicity island protein id 100% and vacA4 id 97% DELETION/pseudo (-1407997-1407909) like virB11-2 id 72% (+1407909-1408594) like virB11-3 id 66%	(-1386619-1385705) like virB11-1 annotated as withjugative transfer regulon protein id 95% (+874645-875637) like virB11-35A annotated as virB11-2 cag pathogenicity island protein id 99% and vacA4 id 97% DELETION/pseudo (-1385938-1385880) like virB11-2 id 80% (+1385895-1386565) like virB11-3 id 66%	(-1383492-1382578) like virB11-1 annotated as withjugative transfer regulon protein id 95% (-457963-456971) like virB11-35A annotated as virB11-2 cag pathogenicity island protein id 100% and vacA4 id 97% DELETION/pseudo (-1382841-1382753) like virB11-2 id 74% (+1382753-1383438) like virB11-3 id 65%
	vacA	(+563328-572891) like vacA1 annotated as toxin id 91% (+853549-857490) like vacA_51 annotated as toxin id 84%, (+853549-854631) vacA2 id 85% (+856273-857490) vacA3 id 92% (+893610-900812) like vacA4 annotated as toxin outer membrane protein id 94%	(+921128-930712) like vacA1 annotated as toxin id 91% (-783122-779062) DELETION/pseudo like vacA2 annotated as toxin; disrupted; no sequence id 89% (-780279-779062) vacA3 similar to vacA2 id 91% and a vacA-51 id 85% (-742795-735242) like vacA4 annotated as toxin outer membrane protein id 93%	(+563326-572889) like vacA1 annotated as toxin id 91%(+853547-857488) like vacA2 annotated as toxin id 85% pero (+856271-857488) like vacA3 annotated as igual id 92% (+855155-857488) like vacA-35A id 84%, (+893608-900810) like vacA4 annotated as toxin outer membrane protein id 94%	(+631620-641207) like vacA1 annotated as toxin id 90% DELETION/pseudo (+922826-926798) like vacA2 annotated as toxin; disrupted; no sequence id 90% and vacA3 id 90% and vacA-51 id 97% (+964192-971376) like vacA4 annotated as toxin outer membrane protein id 92%	(+646868-656428) like vacA1 annotated as toxin id 92% (+938040-941912) like vacA2 annotated as toxin id 91.75% igual vacA3 id 91.63% and a vacA_51 id 91% (+979057-986646) like vacA4 annotated as toxin outer membrane protein id 94%	(-774070-764507) like vacA1 annotated as toxin id 92% (+876684-880622) like vacA3 annotated as toxin 93% and vacA2 id 84% and vacA-35A id 85% (+917140-925494) like vacA4 annotated as toxin id 94%	(-763183-753617) like vacA1 annotated as toxin id 93% (+864796-868734) like vacA2 annotated as toxin id 85% and vacA3 id 92% and vacA-35A id 84% DELETION/pseudo (+905764-913339) like vacA4 annotated as toxin; disrupted; no sequence id 95%	(-736451-726888) like vacA1 annotated as toxin id 90% (+871409-875296) like vacA2 annotated as toxin id 90% and vacA3 id 92% and vacA-35A id 94% (+910869-917945) like vacA4 annotated as toxin outer membrane protein id 92%	(-686153-676599) like vacA1 annotated as toxin id 90% (-406696-402821) like vacA2 annotated as toxin id 90.35% and vacA3 se sobrepone id 90% and vacA-51 id 97% (-367154-359970) like vacA4 annotated as toxin outer membrane protein id 92%	(+663123-672707) like vacA1 annotated as toxin id 95% (+951007-954864) like vacA2 annotated as toxin id 97.07% and vacA-51 id 90% and vacA3 annotated as toxin id 97.37% (+993882-1001381) like vacA4 annotated as toxin outer membrane protein id 95%	(-733680-724180) like vacA1 annotated as toxin id 89% (+830832-834755) like vacA2 annotated as toxin id 87% and vacA3 id 92% and vacA-51 id 92% (+868611-875438) like vacA4 annotated as toxin outer membrane protein id 94%	(+572708-582289) like vacA1 annotated as toxin id 88% (+865774-869679) like vacA3 annotated as toxin id 90% and vacA2 id 84% and vacA-51 id 83% (+911637-918374) like vacA4 annotated as toxin outer membrane protein id 92%	(-718368-708862) like vacA1 annotated as toxin id 90% (-438261-434392) like vacA2 annotated as toxin id 91.0% and vacA3 id 91.3% and vacA-51 id 96% (+869554-876672) like vacA4 annotated as toxin outer membrane protein id 94%	(+724767-734324) like vacA1 annotated as toxin id 91% (-582998-579012) like vacA2 annotated as autotransporter outer membrane beta-barrel domain-withtaining protein id 90% and vacA3 id 91% and vacA-51 id 86% (-542359-535229) like vacA4 annotated as toxin id 92%	(-788246-780868) like vacA1 id 91% (+925264-926703) like vacA2 id 91% (+927922-929139) like vacA3 id 90% and vacA-51 id 97% (+965349-972536) like vacA4 id 92%	(+647266-656826) like vacA1 annotated as toxin id 92% (+940333-944205) like vacA2 annotated as autotransporter vacuolating cytotoxin vacA id 91.75% and vacA3 id 91.63% and vacA-51 id 91% (+981354-988943) like vacA4 annotated as toxin id 94%	(+647249-656809) like vacA1 annotated as toxin id 92% (+938420-942292) like vacA2 annotated as autotransporter vacuolating cytotoxin VacA id 91.75% and vacA3 id 91.63% and vacA-51 id 91% (+979440-987029) like vacA4 annotated as toxin id 94%	(+647303-656863) like vacA1 annotated as toxin id 92% (+938466-942338) like vacA2 annotated as autotransporter vacuolating cytotoxin VacA id 91.75% and vacA3 id 91.63% and vacA-51 id 91% (+979484-987073) like vacA4 annotated as toxin id 94%	(+647300-656860) like vacA1 annotated as toxin id 92% (+938466-942338) vacA2 annotated as autotransporter vacuolating cytotoxin VacA id 92% and vacA-51 id 91% and vacA3 id 92% (+979485-987074) like vacA4 annotated as toxin id 94%	(+780830-790390) like vacA1 annotated as toxin 92% (-599117-591918) like vacA4 annotated as toxin id 93% DELETION/pseudo (-639975-636014) like vacA2 annotated as autotransporter outer membrane beta-barrel domain-withtaining protein frameshifted; no sequence id 90% and vacA3 id 91% and vacA-51 id 84%	(+780841-790401) like vacA1 annotated as toxin id 92% (-599127-591928) like vacA4 annotated as toxin id 93% DELETION/pseudo (-639986-636025) like vacA2 annotated as autotransporter outer membrane beta-barrel domain-withtaining protein frameshifted; no sequence id 90% and vacA3 id 91% and vacA-51 id 84%	(+780845-790405) like vacA1 annotated as toxin id 92% (-599131-591932) like vacA4 annotated as toxin id 93% DELETION/pseudo (-639990-636029) like vacA2 annotated as autotransporter outer membrane beta-barrel domain-withtaining protein frameshifted; no sequence id 90% and vacA3 id 91% and vacA-51 id 84%	(+780837-790397) like vacA1 annotated as toxin id 92% (-599123-591924) like vacA4 annotated as toxin id 93% DELETION/pseudo (-639982-636021) like vacA2 annotated as autotransporter outer membrane beta-barrel domain-withtaining protein frameshifted; no sequence id 90% and vacA3 id 91% and vacA-51 id 84%	(+647315-656875) like vacA1 annotated as toxin id 92% (+938480-942352) vacA2 annotated as autotransporter vacuolating cytotoxin VacA id 91.75% and vacA3 id 91.63% and vacA-51 id 91% (+979502-987091) like vacA4 annotated as toxin id 94%	(+645608-655195) like vacA1 id 96% (+947660-949093) like vacA2 id 97% (+950309-951526) like vacA3 id 98% and vacA-51 id 90% (+993509-1000705) like vacA4 id 96%	(+645590-655177) like vacA1 id 96% (+947910-949343) like vacA2 id 97% (+950559-951776) like vacA3 id 98% and vacA-51 id 90% (+993757-1000953) like vacA4 id 96%	(+645602-655189) like vacA1 id 96% (+947936-949369) like vacA2 id 97% (+950585-951802) like vacA3 id 98% and vacA-51 id 90% (+993780-1000976) like vacA4 id 96%	(+645829-655416) like vacA1 id 96% (+948164-949597) like vacA2 id 97% (+950813-952030) like vacA3 id 98% and vacA-51 id 90% (+994012-1001208) like vacA4 id 96%	(+645607-655194) like vacA1 id 96% (+947933-949366) like vacA2 id 97% (+950582-951799) like vacA3 id 98% and vacA-51 id 90% (+993782-1000978) like vacA4 id 96%	(+648005-657592) like vacA1 id 96% (+950332-951765) like vacA2 id 97% (+952981-954198) like vacA3 id 98% and vacA-51 id 90% (+996197-1003393) like vacA4 id 96%	(+645619-655207) like vacA1 id 96% (+947957-949390) like vacA2 id 97% (+950606-951823) like vacA3 id 98% and vacA-51 id 90% (+993804-1001000) like vacA4 id 96%	(+645592-655179) like vacA1 id 96% (+947919-949352) like vacA2 id 97% (+950568-951785) like vacA3 id 98% and vacA-51 id 90% (+993765-1000961) like vacA4 id 96%	(+645624-655211) like vacA1 id 96% (+947957-949390) like vacA2 id 97% (+950606-951823) like vacA3 id 98% and vacA-51 id 90% (+993804-1001000) like vacA4 id 96%	(+648002-657589) like vacA1 id 96% (+950333-951766) like vacA2 id 97% (+952982-954199) like vacA3 id 98% and vacA-51 id 90% (+996180-1003376) like vacA4 id 96%	(+645610-655197) like vacA1 id 96% (+947938-949371) like vacA2 id 97% (+950587-951804) like vacA3 id 98% and vacA-51 id 90% (+993783-1000979) like vacA4 id 96%	(+645605-655192) like vacA1 annotated as hypothetical protein id 96% (+947930-951796) like vacA annotated as vacuolating cytotoxin id 97% and vacA3 98% and vacA-51 id 90% (+993777-1000973) like vacA4 annotated as vacuolating cytotoxin (VacA)-like protein id 96%	(+64526-74113) like vacA1 id 96% (+366847-368280) like vacA2 id 97% (+369496-370713) like vacA3 id 98% and vacA-51 id 90% (+412694-419890) like vacA4 id 96%	(-794784-785224) like vacA1 annotated as vacuolating cytotoxin VacA-like protein id 91% (+929001-932876) like vacA2 annotated as vacuolating cytotoxin id 91% and vacA3 id 90% and vacA-51 id 97% (+970269-977444) like vacA4 annotated as vacuolating cytotoxin VacA-like protein id 92%	(+638905-646554) like vacA1 annotated as vacuolating cytotoxin VacA-like protein id 91% (+939476-940069) like vacA2 annotated as vacuolating cytotoxin id 91% (+940095-943352) like vacA3 annotated as vacuolating cytotoxin id 91% and vacA-51 id 97% (+980124-987068) like vacA4 annotated as vacuolating cytotoxin VacA-like protein id 92%	(-813371-803811) like vacA1 annotated as vacuolating cytotoxin VacA-like protein id 91% (+947468-951343) like vacA2 annotated as vacuolating cytotoxin id 90.28% and vacA3 id 90.08% and vacA-51 id 97% (+988129-995256) like vacA4 annotated as vacuolating cytotoxin VacA-like protein id 92%	(-786450-776890) like vacA1 annotated as vacuolating cytotoxin VacA-like protein id 91% (+920880-922303) virB11-2 no annotated as en gbk pero en blastn id 91% (+923610-924740) like vacA3 annotated as vacuolating cytotoxin id 90% and vacA-51 id 97%(+960582-967652) like vacA4 annotated as vacuolating cytotoxin VacA-like protein id 92%	(+572488-582045) like vacA1 annotated as vacuolating cytotoxin VacA-like protein id 90% (+903416-904030) like vacA2 annotated as vacuolating cytotoxin id 91% (+905509-907290) like vacA3 annotated as vacuolating cytotoxin id 90% (+903416-907290) vacA-51 id 97% combinados vacA2 and vacA3 (+943491-950666) like vacA4 annotated as vacuolating cytotoxin VacA-like protein id 91%	(-806482-796928) like vacA1 annotated as vacuolating cytotoxin VacA-like protein id 91% (+940482-944357) like vacA2 annotated as vacuolating cytotoxin id 91% and vacA3 id 90% and vacA-51 id 97%(+980857-987846) like vacA4 annotated as vacuolating cytotoxin VacA-like protein id 92%	(-789360-779773) like vacA1 annotated as vacuolating cytotoxin VacA-like protein id 91% (+923485-927375) like vacA2 annotated as vacuolating cytotoxin id 90% and vacA3 id 91% and vacA-51 id 97% (+965045-972220) like vacA4 annotated as vacuolating cytotoxin VacA-like protein id 92%	(+540519-550073) like vacA1 annotated as vacuolating cytotoxin VacA-like protein id 91% (-405414-401524) like vacA2 annotated as vacuolating cytotoxin id 91% and vacA3 id 90% and vacA-51 id 97% (-364326-357139) like vacA4 annotated as vacuolating cytotoxin VacA-like protein id 92%	(+626068-635619) like vacA1 annotated as vacuolating cytotoxin VacA-like protein id 91% (+928486-932361) like vacA2 annotated as vacuolating cytotoxin id 91% and vacA3 id 90% and vacA-51 id 97% (+969554-976924) like vacA4 annotated as vacuolating cytotoxin VacA-like protein id 92%	(-786285-776725) like vacA1 annotated as vacuolating cytotoxin VacA-like protein id 91% (+920386-922332) like vacA2 annotated as vacuolating cytotoxin id 90% and (+922317-924260) like vacA3 annotated as vacuolating cytotoxin id 90% (+960071-967201) like vacA4 annotated as vacuolating cytotoxin VacA-like protein id 92% (+920386-924260) blastn- vacA-51 id 97%	(+548033-557524) like vacA1 annotated as vacuolating cytotoxin VacA-like protein id 90% (-412357-<410766) like vacA2 annotated as vacuolating cytotoxin id 91% (-409190-408357) like vacA3 annotated as vacuolating cytotoxin id 90% and vacA-51 id 96% (-372742-365555) like vacA4 annotated as vacuolating cytotoxin VacA-like protein id 92%
PLASTICITY ZONES	dupA	DELETION/pseudo (+1477093-1477160) blastn id 75% with CC33C	DELETION/pseudo (-1350503-1350079) blastn id 67% CC33C (-1349751-1349654) blastn id 71% J99	DELETION/pseudo (-1477072-1477139) blastn id 75% CC33C (-15384-15162) blastn id 66% J99	DELETION/pseudo (-264863-264829) blastn id 83% CC33C (-15855-15744) blastn id 68% J99	DELETION/pseudo (-460448-460024) blastn id 67% CC33C (+460024-460448) blastn id 66% J99	DELETION/pseudo (+994979-995032) blastn id 76% CC33C (-4600151-460448) blastn id 71% J99	DELETION/pseudo (+15517-15596) blastn id 70% CC33C (-15596-15517) blastn id 71% J99	DELETION/pseudo (+403029-403082) blastn id 76% CC33C (-10286-10207) blastn id 71% J99	DELETION (-1244936-1243613) blastn id 95% CC33C (+1243508-1244936) blastn id 96% J99 hay una proteina de transferencia	(+1062759-1064081) dupA id 100% (+1064087-1064641) dupA	DELETION/pseudo (-1436842-1436810) blastn id 85% CC33C (-13241-13162) blastn id 71% J99	DELETION/pseudo (+15442-15521) blastn id 73% CC33C (-15521-15442) blastn id 71% J99	DELETION/pseudo (-208950-208916) blastn id 83% CC33C (+1308725-1308804) blastn id 71% J99	DELETION/pseudo (+1231941-1231975) blastn id 83% CC33C (+1482287-1482348) blastn id 74% J99	DELETION/pseudo (+123184 -123608) blastn id 68% CC33C (-123608 -123184) blastn id 66% J99	DELETION/pseudo (-460618-460194) blastn id 67% CC33C (+460194-460618) blastn id 66% J99	DELETION/pseudo (-460604-460180) blastn id 67% CC33C (+460180-460604) blastn id 66% J99	DELETION/pseudo (-460613-460189) blastn id 67% CC33C (+460189-460613) blastn id 66% J99	DELETION/pseudo (-460610-460186) blastn id 67% CC33C (+460186-460610) blastn id 66% J99	DELETION/pseudo (+456675-457099) blastn id 67% CC33C (-460610-456675) blastn id 66% J99	DELETION/pseudo (+456685-457109) blastn id 67% CC33C (-457109-456685) blastn id 66% J99	DELETION/pseudo (+456689-457113) blastn id 67% CC33C (-457113-456689) blastn id 66% J99	DELETION/pseudo (+456681-457105) blastn id 67% CC33C (-457105-456681) blastn id 66% J99	DELETION/pseudo (-460627-460203) blastn id 67% CC33C (+460203-460627) blastn id 66% J99	(-1064307-1062882) blastn id 97% J99	(-1064555-1063130) blastn id 97% J99	(-1064577-1063152) blastn id 97% J99	(-1064810-1063385) blastn id 97% J99	(-1064580-1063155) blastn id 97% J99	(-1066996-1065571) blastn id 97% J99	(-1064602-1063177) blastn id 97% J99	(-1064563-1063138) blastn id 97% J99	(-1064602-1063177) blastn id 97% J99	(-1066978-1065553) blastn id 97% J99	(-1064579-1063154) blastn id 97% J99	(+1063150-1064598) blastn id 97% with j99	(-483492-482067) blastn id 97% J99	DELETION/pseudo (-257794-257760) blastn id 83% CC33C (-15681-15620) blastn id 76% J99	DELETION/pseudo (-282584-282550) blastn id 83% CC33C (-15709-15648) blastn id 76% J99	DELETION/pseudo (+15459-15538) blastn id 70% CC33C (-15681-15620) blastn id 76% J99	DELETION/pseudo (+109916-110340) blastn id 68% CC33C (-110340-109916) blastn id 67% J99	(-706482-705054) blastn id 97% J99	DELETION/pseudo (+113364-113789) blastn id 67% CC33C (-113789-113364) blastn id 66% J99	DELETION/pseudo (+113466-113890) blastn id 68% CC33C (-113890-113466) blastn id 67% J99	DELETION/pseudo (+109025-109449) blastn id 68% CC33C (-109449-109025) blastn id 66% J99	DELETION/pseudo (+103458-103883) blastn id 67% CC33C (-103883-103458) blastn id 66% J99	DELETION/pseudo (+116007-116431) blastn id 68% CC33C (-116431-116007) blastn id 67% J99	DELETION/pseudo (+116589-117013) blastn id 68% CC33C (-117013-116589) blastn id 66% J99
	IceA	DELETION (-1182083-1181904) ICEA id 92%	DELETION/pseudo (+133696-134372) HNH endonuclease; disrupted; no sequence id 92%	DELETION/pseudo (-1181629-1181386) ICEA family protein; disrupted; no sequence id 92%	DELETION/pseudo (-1479392-1479369) blastn id 92%	(-1286275-1285757) restriction endonuclease id 100%	DELETION/pseudo (-768303-768288) blastn id 100%	DELETION/pseudo (-1234302-1233798) restriction endonuclease; disrupted; no sequence blastn id 93%	DELETION/pseudo (+1393668-1393691) blastn id 93%	DELETION/pseudo (-1425134-1425111) blastn id 92%	DELETION/pseudo (-570567-570550) blastn id 100%	(-1131526-1130990) restriction endonuclease id 93%	(-1292204-1291731) restriction endonuclease id 90%	DELETION/pseudo (-1125828-1125315) restriction endonuclease; disrupted; no sequence blastn id 92%	DELETION/pseudo (-273766-273319) id 89%	(+1233170-1233629) blastn id 90% pero creo que es +/- with algo de error	DELETION/pseudo (-1290769-1290083) internal stop; no sequence id 100%	DELETION/pseudo (-1286876-1286190) internal stop; no sequence id 100%	DELETION/pseudo (-1286931-1286245) internal stop; no sequence id 100%	DELETION/pseudo (-1286925-1286239) internal stop; no sequence id 100%	DELETION/pseudo (+245647-245965) type II restriction endonuclease frameshifted; no sequence id 89%	DELETION/pseudo (+245973-245478) type II restriction endonuclease frameshifted; no sequence id 89%	DELETION/pseudo (+245661-245979) type II restriction endonuclease frameshifted; no sequence id 89%	DELETION/pseudo (+245653-245971) type II restriction endonuclease frameshifted; no sequence id 89%	DELETION/pseudo (-1288925-1288239) internal stop; no sequence id 100%	DELETION/pseudo (-551623-551606) id 100%	DELETION/pseudo (-551606-551589) id 100%	DELETION/pseudo (-551618-551601) id 100%	DELETION/pseudo (-551844-551827) id 100%	DELETION/pseudo (-551622-551605) id 100%	DELETION/pseudo (-551621-551604) id 100%	DELETION/pseudo (-551634-551617) id 100%	DELETION/pseudo (-551609-551592) id 100%	DELETION/pseudo (-551638-551621) id 100%	DELETION/pseudo (-551620-551603) id 100%	DELETION/pseudo (-551628-551611) id 100%	DELETION/pseudo (-551620-551603) id 100%	DELETION/pseudo (-1638462-1638445) id 100%	DELETION/pseudo (-643738-643718) id 95%	(-1252768-1252082)	(-1262087-1261401)	DELETION/pseudo (-629727-629707) id 95%	(-1213455-1212886) iceA ulcer-associated gene restriction endonuclease id 91%	DELETION (+1254645-1254982) id 86%	DELETION (-1235924-1235718) annotated as pero en blastn sale error (+1235427-1235880) id 88.6%	DELETION/pseudo (+520418-520450) id 85%	DELETION/pseudo (+789213-789233) id 95%	DELETION (+1229405-1229858) id 89.70%	DELETION/pseudo (+695846-695871) id 92%
	iceA1	DELETION/pseudo (-1181643-1181400) ICEA family protein; disrupted; no sequence id 93%	DELETION/pseudo (+134056-134372) blastn id 85% match with IceA	DELETION/pseudo (-1181698-1181386) blastn id 86% match with IceA	DELETION/pseudo (-821823-821807) blastn id 100%	DELETION (-1286073-1285757) id 86%	DELETION/pseudo (+585765-585782) blastn id 100%	DELETION/pseudo (-1234302-1233798) restriction endonuclease; disrupted; no sequence blastn id 95% match with iceA	DELETION/pseudo (-379475-379454) blastn id 91%	DELETION/pseudo (+505591-505607) blastn id 100%	DELETION/pseudo (-851954-851938) blastn id 100%	DELETION (-1131306-1131036) id 90%	DELETION (-1292047-1291773) id 87%	DELETION/pseudo (-1125608-1125315) blastn id 89% and Duplicacion de iceA	DELETION/pseudo (+273295-273795) restriction endonuclease;frameshifted; internal stop; no sequence blastn id 89.12%	DELETION (-1233432-1233141) id 89%	DELETION/pseudo (-1290399-1290083) internal stop; no sequence id 86% duplicacion de iceA	DELETION/pseudo (-1286506-1286190) internal stop; no sequence id 86% duplicacion de iceA	DELETION/pseudo (-1286561-1286245) internal stop; no sequence id 86% duplicacion de iceA	DELETION/pseudo (-1286555-1286239) internal stop; no sequence id 86% duplicacion de iceA	DELETION/pseudo (+245672-245965) type II restriction endonuclease frameshifted; no sequence id 100% with error	DELETION/pseudo (+245680-245973) type II restriction endonuclease frameshifted; no sequence id 100% with e value 5e-152	DELETION/pseudo (+245686-245979) type II restriction endonuclease frameshifted; no sequence id 100% with e value 5e-152	DELETION/pseudo (+245678-245971) type II restriction endonuclease frameshifted; no sequence id 100% with e value 5e-152	DELETION/pseudo (-1286555-1286239) internal stop; no sequence id 86% duplicacion de iceA	DELETION/pseudo (-635450-635433) id 94%	DELETION/pseudo (-635432-635415) id 94%	DELETION/pseudo (-635444-635427) id 94%	DELETION/pseudo (-635671-635654) id 94%	DELETION/pseudo (-635449-635432) id 94%	DELETION/pseudo (-637847-637830) id 94%	DELETION/pseudo (-635461-635444) id 94%	DELETION/pseudo (-635434-635417) id 94%	DELETION/pseudo (-635466-635449) id 94%	DELETION/pseudo (-637844-637827) id 94%	DELETION/pseudo (-635452-635435) id 94%	DELETION/pseudo (-635447-635430) id 94%	DELETION/pseudo (-54368-54351) id 94%	DELETION/pseudo (+643719-643738) id 85%	DELETION (-1252398-1252128) id 90% duplicacion de iceA	DELETION (-1261717-1261447) id 90% duplicacion de iceA	DELETION/pseudo (+629708-629727) id 95%	DELETION (-1213202-1212932) id 88% duplicacion de iceA	(-1254951-1254616) id 84% like fraccionado	(-1235651-1235370) type II restriction enzyme NlaIII blastn id 89.46%	DELETION/pseudo (-728184-728168) id 100%	DELETION/pseudo (-789232-789213) id 95%	(-1230019-1229855) ulcer-associated gene restriction endonuclease id 90.14%	DELETION/pseudo (-695871-695846) id 88%
	iceA2	(-1182026-1181636) blastn id 94%	DELETION (+133753-134128) blastn id 88% overlaps with the pseudogen	(-1182069-1181890) id 94%	DELETION/pseudo (-475896-475875) blastn id 91%	DELETION (-1286386-1286000) blastn id 93%	DELETION/pseudo (-1542811-1542788) blastn id 100%	DELETION (-1234411-1234042) blastn id 90% overlapping pseudogenes	DELETION/pseudo (-427252-427231) blastn id 91%	DELETION/pseudo (+840003-840025) blastn id 91%	DELETION/pseudo (-996707-996689) blastn id 95%	DELETION (-1131618-1131234) id 90%	DELETION (-1292360-1291975) id 88%	DELETION/pseudo (-1125921-1125536) blastn id 90%	DELETION/pseudo (+273203-273575) blastn id 87%	DELETION (-1233734-1233360) id 88%	DELETION/pseudo (-1290712-1290326) id 93%	DELETION/pseudo (-1286819-1286433) id 93%	DELETION/pseudo (-1286874-1286488) id 93%	DELETION/pseudo (-1286868-1286482) id 93%	DELETION/pseudo (+245359-245748) id 100% sin error	DELETION/pseudo (+245367-245756) id 100% sin error	DELETION/pseudo (+245373-245762) id 100% sin error	DELETION/pseudo (+245365-245754) id 100% sin error	DELETION/pseudo (-1288868-1288482) id 93%	DELETION/pseudo (+681910-681925) id 100%	DELETION/pseudo (+682170-682185) id 100%	DELETION/pseudo (+682184-682199) id 100%	DELETION/pseudo (+682413-682428) id 100%	DELETION/pseudo (+682185-682200) id 100%	DELETION/pseudo (+684587-684602) id 100%	DELETION/pseudo (+682201-682216) id 100%	DELETION/pseudo (+682173-682188) id 100%	DELETION/pseudo (+682207-682222) id 100%	DELETION/pseudo (+684584-684599) id 100%	DELETION/pseudo (+682191-682206) id 100%	DELETION/pseudo (+682187-682202) id 100%	DELETION/pseudo (+101108-101123) id 100%	DELETION/pseudo (-480989-480968) id 91%	DELETION (-1252711-1252326) id 91% duplicacion de iceA	DELETION (-1262030-1261645) id 90%	DELETION/pseudo (-38906-38890) id 100% (-1229483-1229304) iceA2 protein pero es parte de metiltranferasa-flanqueantes mal anotada	DELETION (-1213515-1213130) id 89%	(-1255207-1255004) id 78% una pequeña parte	(-1235924-1235718) iceA id 86.53%	DELETION/pseudo (+850358-850379) id 91% pero en gbk (-1218410-1218231) iceA2 with error	DELETION/pseudo (-466443-466422) id 91% pero en gbk (-1250845-1250666) iceA2 with error	(-1229738-1229376) gbk annotated as iceA solo blastn id 85.97%	DELETION/pseudo (+370229-370247) id 100% pero en gbk (-1221589-1221410) iceA2 with error
			1
			1																																		1		2	1	1	1	1	1	1	1	1	1	1
		Color conventions
			Gen Deletion
			genes without annotation but detected in this analysis
			Gen duplication
[truncated: 88 more columns]
