# Supplementary material for: Helicobacter pylori virulence factors: relationship between genetic variability and phylogeographic origin
Source: PeerJ. 2021 Nov 26;9:e12272. doi: 10.7717/peerj.12272 (PMC8628625; doi:10.7717/peerj.12272)
Supplement: Supplemental Information 8 [file peerj-09-12272-s008.xlsx]

## Sheet: Hoja1
	ureA	ureB	ureI	ureE	ureF	ureG	ureH	alpA/hopC	alpB/hopB	babA/hopS	babB/hopT	hpaA	hopZ	horB	sabA/hopP	sabB/hopO	futA	futB	futC	napA	oipA/hopH	flaA	flaB	flaG	flgA	flgB	flgC	flgD	flgE_1	flgE_2	flgG_1	flgG_2	flgH	flgl	flgK	flgL	flhA	flhB_1	flhB_2	flhF	fliA	fliD	fliE	fliF	fliG	fliH	fliI	fliL	fliM
51	97.97	97.02	96.77	96.49	97.12	97.49	96.34	92.77	94.11	89.59	100.00	100.00	90.53	100.00	90.15	0	84.78	83.59	94.57	96.55	94.87	96.28	95.73	93.92	95.89	96.93	95.88	92.66	95.41	95.65	92.72	95.31	97.62	96.40	95.72	95.05	97.14	94.89	97.37	97.82	96.65	96.35	95.14	96.01	96.22	96.53	96.70	96.74	96.43
52	98.37	96.78	96.94	96.88	95.73	97.33	96.48	93.26	93.79	89.36	95.50	97.32	90.76	97.79	87.02	87.05	0	86.31	93.80	97.24	95.20	96.22	95.99	95.03	95.28	95.51	95.88	94.85	95.46	0	92.96	95.69	98.18	96.89	95.61	94.33	97.18	94.43	97.42	97.53	96.14	96.05	96.36	96.71	96.22	96.40	97.24	96.92	97.09
83	98.58	96.96	96.43	96.30	95.85	97.50	96.11	92.84	94.84	87.59	92.64	95.79	91.60	97.79	90.21	0	0	85.83	93.81	96.09	95.41	96.02	95.79	94.29	95.43	96.45	95.88	91.98	95.50	95.54	93.21	95.18	98.32	96.70	96.65	95.09	97.09	94.43	95.11	97.53	95.88	95.95	95.44	96.54	96.32	96.65	97.39	96.56	97.00
908	97.56	96.55	95.92	98.05	94.55	95.67	93.48	93.60	93.77	82.95	0	94.76	91.60	96.51	0	91.83	0	91.48	95.46	95.17	95.45	99.93	99.74	92.46	93.76	95.50	96.09	100.00	100.00	100.00	100.00	100.00	97.75	96.60	96.05	95.01	95.91	100.00	100.00	94.77	94.66	94.43	95.14	95.54	95.74	97.17	97.62	97.46	96.71
2017	97.56	96.55	95.92	98.05	94.55	95.67	93.48	93.60	93.89	81.94	0	95.02	0	96.63	0	0	0	92.09	95.35	95.17	95.45	100.00	100.00	92.46	93.76	95.50	96.09	100.00	100.00	100.00	100.00	100.00	97.75	96.50	96.00	95.01	95.87	100.00	100.00	94.77	94.66	94.43	95.14	95.60	95.74	97.17	97.62	97.46	96.71
2018	97.56	96.61	95.92	98.05	94.42	95.67	93.48	93.60	93.89	82.84	0	95.02	91.50	96.63	0	0	94.04	0	95.13	95.17	95.66	100.00	99.94	92.46	93.76	95.50	96.09	100.00	100.00	100.00	99.88	100.00	97.75	96.60	96.00	95.01	95.91	100.00	100.00	94.63	94.66	94.43	95.14	95.60	95.74	97.17	97.62	97.46	96.71
26695	100.00	100.00	100.00	100.00	100.00	100.00	100.00	96.41	97.55	88.38	93.15	96.93	92.68	97.33	93.06	90.22	0	89.36	95.14	100.00	100.00	96.61	96.44	100.00	100.00	100.00	100.00	95.37	96.43	96.04	93.70	94.68	100.00	100.00	100.00	100.00	100.00	95.64	97.05	100.00	100.00	100.00	100.00	100.00	100.00	100.00	100.00	100.00	100.00
26695-1	100.00	100.00	100.00	100.00	100.00	100.00	100.00	96.41	97.55	88.38	93.15	96.93	92.68	97.33	93.06	90.22	0	89.36	95.14	100.00	100.00	96.61	96.38	100.00	100.00	100.00	100.00	95.37	96.43	96.04	93.70	94.68	100.00	100.00	100.00	100.00	100.00	95.64	97.05	100.00	100.00	99.95	100.00	99.94	100.00	100.00	100.00	100.00	100.00
26695-1CH	100.00	100.00	100.00	100.00	100.00	100.00	100.00	96.41	97.55	88.38	93.15	96.93	92.68	97.33	93.06	90.22	0	89.36	95.14	100.00	100.00	96.61	96.38	100.00	100.00	100.00	100.00	95.37	96.43	96.04	93.70	94.68	100.00	100.00	100.00	100.00	100.00	95.64	97.05	100.00	100.00	99.95	100.00	99.94	100.00	100.00	100.00	100.00	100.00
26695-1CL	100.00	100.00	100.00	100.00	100.00	100.00	100.00	96.41	97.55	88.38	93.15	96.93	92.68	97.33	93.06	90.22	0	89.36	95.14	100.00	100.00	96.61	96.38	100.00	100.00	100.00	100.00	95.37	96.43	96.04	93.70	94.68	100.00	100.00	100.00	100.00	100.00	95.64	97.05	100.00	100.00	99.95	100.00	99.94	100.00	100.00	100.00	100.00	100.00
26695-1MET	100.00	100.00	100.00	100.00	100.00	100.00	100.00	96.41	97.55	88.38	93.15	96.93	92.68	97.33	93.06	90.22	89.85	0	95.14	100.00	100.00	96.61	96.38	100.00	100.00	100.00	100.00	95.37	96.43	96.04	93.70	94.68	100.00	100.00	100.00	100.00	100.00	95.64	97.05	100.00	100.00	99.95	100.00	99.94	100.00	100.00	100.00	100.00	100.00
26695-dR	100.00	100.00	100.00	100.00	100.00	100.00	100.00	96.41	97.55	88.38	93.15	96.93	92.68	97.33	93.06	90.22	89.93	0	95.03	100.00	100.00	96.61	96.38	100.00	100.00	100.00	100.00	95.37	96.43	96.04	93.70	94.68	100.00	100.00	100.00	100.00	100.00	95.64	97.05	100.00	100.00	99.95	100.00	99.94	100.00	100.00	100.00	100.00	100.00
26695-dRdM1dM2	100.00	100.00	100.00	100.00	100.00	100.00	100.00	96.41	97.55	88.38	93.15	96.93	92.68	97.33	93.06	90.22	0	0	95.03	100.00	100.00	96.61	96.38	100.00	100.00	100.00	100.00	95.37	96.43	96.04	93.70	94.68	100.00	100.00	100.00	100.00	100.00	95.64	97.05	100.00	100.00	99.95	100.00	99.94	100.00	100.00	100.00	100.00	100.00
26695-dRdM2	100.00	100.00	100.00	100.00	100.00	100.00	100.00	96.41	97.55	88.38	93.15	96.93	92.68	97.33	93.06	90.22	89.93	0	95.03	100.00	100.00	96.61	96.38	100.00	100.00	100.00	100.00	95.37	96.43	96.04	93.70	94.68	100.00	100.00	100.00	100.00	100.00	95.64	97.05	100.00	100.00	99.95	100.00	99.94	100.00	100.00	100.00	100.00	100.00
29CaP	99.19	97.54	97.45	97.86	96.86	97.50	95.35	92.83	94.48	89.82	93.71	97.19	93.44	97.10	92.29	0	0	90.77	96.35	94.94	96.52	96.93	96.96	95.76	92.87	97.40	96.50	93.12	96.29	95.98	97.16	98.35	97.20	97.38	96.92	95.58	97.09	95.54	98.53	96.01	96.35	96.15	95.45	0	95.93	97.81	97.01	96.20	98.31
35A	98.17	96.96	96.43	96.10	95.85	97.33	95.89	92.72	94.34	86.82	92.68	95.02	91.45	98.49	90.09	0	85.68	84.80	93.69	96.09	94.43	95.89	95.53	94.29	95.28	96.45	96.30	92.13	95.83	95.38	92.59	95.06	97.90	96.79	96.16	94.89	97.41	0	96.62	97.60	95.88	96.10	95.74	96.54	96.80	96.40	97.16	97.28	96.62
7.13_R1a	98.37	97.60	97.28	97.86	96.60	98.83	95.23	97.58	95.99	99.58	0	96.81	0	97.21	100.00	0	0	0	96.35	95.86	96.13	96.48	96.38	94.12	94.67	99.53	99.79	94.58	96.66	96.86	93.95	95.69	97.76	97.57	96.43	96.74	96.91	95.45	97.79	97.68	95.96	96.00	98.78	97.07	97.29	96.65	97.62	96.73	98.40
7.13_R1c	98.37	97.60	97.28	97.86	96.60	98.83	95.23	97.58	95.99	99.86	0	96.81	0	97.21	100.00	0	0	0	96.35	95.86	96.13	96.48	96.38	94.12	94.67	99.53	99.79	94.58	96.66	96.86	93.95	95.69	97.76	97.57	96.43	96.74	96.91	95.45	97.79	97.68	95.96	96.00	98.78	97.07	97.29	96.65	97.62	96.73	98.40
7.13_R2b	98.37	97.60	97.28	97.86	96.60	98.83	95.23	97.58	95.99	99.72	0	96.81	0	97.21	100.00	0	0	0	96.46	95.86	96.13	96.48	96.38	94.12	94.67	99.53	99.79	94.58	96.66	96.86	93.95	95.69	97.76	97.57	96.43	96.74	96.91	95.45	97.79	97.68	95.96	96.00	98.78	97.07	97.29	96.65	97.62	96.73	98.40
7.13_R3a	98.37	97.60	97.28	97.86	96.60	98.83	95.23	97.58	95.99	99.95	0	96.81	0	97.21	100.00	0	0	0	96.35	95.86	96.13	96.48	96.38	94.12	94.67	99.53	99.79	94.58	96.66	96.86	93.95	95.69	97.76	97.57	96.43	96.74	96.91	95.45	97.79	97.68	95.96	96.00	98.78	97.07	97.29	96.65	97.62	96.73	98.40
7C	98.98	97.02	97.28	97.08	96.21	96.50	92.59	96.08	94.96	0	90.07	96.04	92.98	96.75	94.14	0	0	0	95.79	95.40	95.90	96.80	96.70	94.86	93.91	96.68	96.50	92.46	96.75	96.31	95.31	95.69	97.48	97.86	96.27	95.60	96.64	95.36	97.74	95.79	95.83	96.59	95.45	96.13	96.32	97.30	97.32	97.46	97.93
Aklavik117	98.37	97.25	97.45	95.12	96.06	97.00	96.73	93.13	94.96	89.67	81.87	97.57	91.03	96.63	91.86	0	84.97	85.60	94.02	96.55	86.27	96.15	96.25	94.84	94.82	97.64	95.68	92.39	95.73	95.71	93.46	94.30	97.76	96.79	96.38	95.33	97.46	95.26	97.74	97.53	94.85	96.50	95.44	96.24	97.09	96.91	96.86	96.56	97.18
Aklavik86	97.76	96.96	96.94	96.10	96.33	96.50	96.66	81.41	87.41	0	86.53	84.46	83.39	90.13	76.60	0	0	88.16	93.80	95.40	95.56	94.91	94.95	94.12	95.59	96.93	95.06	92.17	95.27	95.21	93.09	94.30	97.20	96.79	95.33	94.93	97.05	95.17	96.99	97.39	94.98	95.90	95.44	94.66	97.00	96.78	96.70	96.74	97.65
ausabrJ05	0	97.25	96.09	96.49	94.42	97.33	94.76	91.93	93.76	85.70	0	96.17	0	96.28	88.94	0	0	87.10	92.58	96.55	0	95.83	95.86	93.92	94.06	96.69	96.30	92.49	95.73	94.94	93.70	96.45	98.18	96.50	96.38	94.73	96.91	95.45	97.42	96.88	95.18	95.91	96.06	96.42	96.90	96.40	96.25	96.56	97.93
B38	98.98	97.95	97.79	98.05	94.94	96.17	93.23	96.72	96.25	88.25	0	96.68	100.00	97.33	92.75	0	100.00	100.00	100.00	95.17	96.33	96.15	96.44	96.47	94.68	96.22	96.30	95.32	96.66	96.26	95.30	95.56	98.17	97.76	97.20	95.58	96.64	95.54	97.07	95.43	96.74	95.51	96.97	97.12	96.51	96.92	97.78	97.10	98.50
B8	98.37	97.60	97.28	97.86	96.60	98.83	95.23	97.58	95.99	100.00	0	96.81	93.17	97.21	100.00	0	91.49	92.02	96.35	95.86	96.13	96.48	96.38	94.12	94.67	99.53	99.79	94.58	96.66	96.86	93.95	95.69	97.76	97.57	96.43	96.74	96.91	95.45	97.79	97.68	95.96	96.00	98.78	97.07	97.29	96.65	97.55	96.73	98.40
BCM-300	97.76	97.13	96.09	98.05	95.27	96.67	93.23	93.99	93.89	87.15	89.28	94.51	92.86	95.94	89.35	92.01	92.18	91.81	95.46	95.17	95.42	98.24	97.99	93.94	91.93	95.73	96.30	95.66	97.73	97.08	96.67	97.21	97.62	97.28	95.72	95.84	96.01	97.76	99.27	95.50	94.66	95.36	94.53	95.42	95.93	96.78	97.85	96.92	97.00
BM012A	99.59	97.66	98.30	97.86	96.47	98.33	94.72	97.50	96.56	89.17	90.69	96.93	93.20	96.86	93.06	95.73	90.24	0	94.48	97.47	97.08	95.76	96.31	95.95	94.98	96.69	95.27	95.05	96.43	95.76	93.46	94.55	98.04	97.76	96.49	95.49	97.14	95.26	97.05	97.68	98.18	96.79	96.67	96.65	98.06	96.67	97.16	98.01	98.03
BM012B	99.80	97.37	98.47	98.83	97.65	98.00	95.35	96.41	96.62	89.22	90.69	96.68	93.53	96.98	92.91	95.73	89.13	0	94.37	97.47	97.08	95.76	96.31	95.95	94.98	96.69	95.27	93.41	96.43	96.26	93.46	94.55	98.04	97.76	96.49	95.49	97.41	95.26	97.05	97.68	97.79	96.79	96.67	96.65	98.06	96.67	97.24	98.01	98.03
BM012S	99.59	97.66	98.30	97.86	96.47	98.33	94.72	97.50	96.56	89.13	0	96.93	93.38	96.86	93.15	95.73	90.24	0	94.48	97.47	97.08	95.76	96.31	95.95	94.98	96.69	95.27	95.05	96.43	95.76	93.46	94.55	98.04	97.76	96.49	95.49	97.14	95.26	97.05	97.68	98.18	96.79	96.67	96.65	98.06	96.67	97.16	98.01	98.03
BM013A	97.36	97.54	97.11	97.27	96.47	96.50	93.09	96.60	95.80	92.82	91.66	97.45	93.59	96.64	92.99	0	0	92.07	96.35	94.48	95.76	96.28	96.05	94.66	94.98	96.22	96.71	97.01	96.66	97.08	94.93	94.68	98.04	97.67	96.87	95.98	97.00	95.64	97.44	96.95	94.92	95.95	97.27	96.30	96.90	96.67	97.62	96.92	97.09
BM013B	97.36	97.54	97.11	97.27	96.47	96.50	93.09	96.60	95.80	92.82	91.66	97.45	93.39	96.64	92.99	0	0	92.07	96.35	94.48	95.76	96.28	96.05	94.66	94.98	96.22	96.71	97.01	96.66	97.14	94.93	94.68	98.04	97.67	96.87	95.98	97.00	95.64	97.44	96.95	94.92	95.95	97.27	96.30	96.90	96.67	97.62	96.92	97.09
CC33C	99.39	97.89	96.94	97.47	95.95	95.83	91.35	92.12	93.72	86.93	90.47	94.76	92.92	96.17	91.95	0	93.51	0	96.57	96.55	94.71	97.72	95.15	94.12	92.24	95.50	96.09	93.78	98.10	96.75	98.02	96.07	97.76	95.92	96.27	95.29	96.41	97.68	98.17	0	95.70	95.02	95.14	95.25	95.93	96.65	97.16	96.56	97.18
Cuz20	97.97	97.19	97.79	95.71	96.06	96.83	96.73	92.72	93.79	87.26	87.36	97.19	0	96.63	90.58	0	0	86.40	94.36	96.55	95.24	95.50	95.86	93.92	95.28	96.69	95.88	91.66	95.92	96.04	93.09	95.69	98.04	97.18	96.16	95.17	97.41	95.64	97.37	98.04	95.75	96.50	95.14	96.54	96.41	96.78	97.09	95.65	97.56
dRdM1	100.00	100.00	100.00	100.00	100.00	100.00	100.00	96.41	97.55	88.38	93.15	96.93	92.68	97.33	93.06	90.22	89.93	0	95.03	100.00	100.00	96.61	96.38	100.00	100.00	100.00	100.00	95.37	96.43	96.04	93.70	94.68	100.00	100.00	100.00	100.00	100.00	95.64	97.05	100.00	100.00	99.95	100.00	99.94	100.00	100.00	100.00	100.00	100.00
dRdM2addM2	100.00	100.00	100.00	100.00	100.00	100.00	100.00	96.41	97.55	88.38	93.15	96.93	92.68	97.33	93.06	90.22	89.93	0	95.03	100.00	100.00	96.61	96.38	100.00	100.00	100.00	100.00	95.37	96.43	96.04	93.70	94.68	100.00	100.00	100.00	100.00	100.00	95.64	97.05	100.00	100.00	99.95	100.00	99.94	100.00	100.00	100.00	100.00	100.00
DU15	97.36	97.08	97.96	95.32	95.33	97.17	96.73	93.58	94.67	0	0	95.27	91.73	97.44	90.35	0	0	0	94.68	96.55	94.21	96.28	95.92	95.21	94.52	96.45	95.88	91.52	96.38	95.38	93.58	94.80	97.76	96.60	95.88	94.77	97.18	0	97.74	97.53	95.37	96.40	95.44	96.48	96.03	96.65	97.09	97.10	97.18
ELS37	99.39	97.54	97.28	96.49	97.12	97.17	92.36	94.09	94.33	86.45	92.46	95.66	94.65	97.56	91.75	94.17	86.88	89.24	94.91	95.63	96.22	96.61	96.25	95.40	93.76	97.87	95.06	94.31	97.08	96.42	94.93	96.45	97.48	97.57	96.05	95.53	95.91	95.26	98.52	96.30	97.27	96.00	94.55	96.60	96.71	96.27	97.70	96.56	97.75
F13	98.58	97.54	97.11	95.12	96.06	96.33	95.98	93.59	93.89	86.82	90.99	96.42	91.05	97.56	89.92	0	86.70	86.18	91.75	96.09	94.10	95.89	95.60	94.66	95.28	96.45	95.68	91.85	95.92	95.54	92.47	95.18	98.32	97.08	95.77	94.69	97.59	94.80	96.68	97.97	95.37	96.20	96.36	96.72	96.03	96.01	97.16	96.01	96.62
F16	98.78	97.08	96.60	95.71	95.72	96.17	96.60	93.64	93.53	86.55	92.80	96.68	91.18	97.68	89.91	0	0	86.74	94.35	96.55	94.87	96.22	95.86	94.84	95.89	96.93	95.88	93.75	95.83	95.27	92.72	94.30	98.60	96.50	95.28	94.17	97.00	95.17	96.31	97.82	95.50	95.71	94.83	96.36	95.93	95.50	97.09	96.92	97.18
F17	98.17	97.25	97.11	96.10	96.48	97.33	95.85	92.64	93.95	87.04	81.33	94.58	92.10	97.91	89.39	0	0	85.89	92.47	97.01	94.87	95.89	95.86	94.48	95.28	96.45	96.30	94.59	95.83	95.60	92.47	93.92	97.76	96.31	96.27	94.69	96.96	94.99	98.12	97.82	95.62	96.25	95.44	96.36	96.51	95.37	97.16	96.38	97.28
F18	97.97	97.13	96.77	96.69	95.59	96.33	95.85	92.98	94.45	88.97	92.96	96.93	91.45	97.68	90.40	0	86.25	84.95	93.13	96.09	94.98	96.41	95.60	94.66	94.52	97.40	96.71	93.70	96.01	95.54	92.84	94.93	98.32	97.28	95.83	94.65	97.37	95.08	97.05	97.90	95.24	96.05	96.35	96.65	96.12	95.75	97.39	96.74	97.28
F20	98.37	96.84	96.77	96.10	94.95	97.83	95.63	92.85	94.90	86.45	92.06	96.93	92.37	97.79	90.06	0	85.38	86.16	92.58	96.32	94.76	96.09	96.31	93.74	94.82	96.22	95.27	94.05	96.01	95.32	92.84	94.68	98.32	96.60	96.16	94.61	97.46	94.89	95.94	97.89	95.62	95.90	95.15	96.24	96.12	97.04	96.40	96.74	96.62
F209	97.56	96.37	96.43	96.10	96.21	97.17	95.35	91.96	94.52	85.96	93.88	97.83	91.60	97.44	90.08	0	86.37	85.65	92.03	96.55	94.98	95.96	96.05	93.93	94.98	96.93	96.30	92.65	96.01	95.54	92.59	94.42	98.32	97.28	95.77	94.93	97.28	95.17	97.42	97.31	96.14	96.15	97.27	96.13	96.51	96.91	97.09	96.01	97.00
F21	98.78	96.96	96.77	96.10	95.59	96.83	95.98	93.21	93.05	86.90	92.51	96.55	92.35	97.91	89.96	0	87.22	85.71	94.02	97.01	94.76	95.96	95.86	94.48	94.82	96.93	95.88	91.97	95.87	95.76	92.96	93.92	97.62	96.21	96.10	94.89	97.18	95.08	96.31	97.60	95.75	96.40	96.06	96.71	96.61	96.65	96.93	96.56	97.09
F210	98.98	97.37	96.77	95.91	95.72	97.17	97.12	92.94	94.33	86.11	92.35	97.70	90.55	97.10	90.12	0	0	88.07	93.02	96.09	94.43	95.63	95.40	94.84	94.98	97.40	96.09	93.87	95.55	95.54	92.35	94.30	97.34	96.79	95.99	94.37	97.23	94.99	96.68	97.53	95.88	96.15	96.66	96.19	96.32	96.27	97.47	96.92	97.09
F211	98.58	97.60	96.43	96.48	95.92	96.17	95.85	92.72	93.26	86.78	92.06	95.02	91.34	97.33	89.12	0	86.50	84.39	92.91	96.09	94.76	96.35	96.25	94.29	94.82	96.45	95.47	92.27	95.92	95.27	92.22	95.18	97.48	96.79	95.99	94.37	97.68	94.89	96.68	97.89	95.37	96.10	94.83	96.89	96.41	95.50	97.01	96.74	96.53
F23	97.15	97.19	96.26	96.88	95.60	97.33	96.40	93.77	94.45	86.26	91.95	96.42	92.85	97.44	89.46	0	85.78	85.55	93.24	97.70	94.65	96.02	95.92	95.03	95.28	96.45	96.09	91.27	95.55	95.60	92.96	94.55	97.76	96.60	96.16	94.93	97.46	94.61	97.37	97.75	95.11	96.20	95.76	96.42	96.32	95.88	96.93	96.92	97.09
F24	98.37	97.19	96.94	95.70	95.85	96.33	95.85	93.45	93.51	86.71	92.07	95.79	91.17	99.54	89.85	0	85.89	0	92.18	96.09	95.31	96.15	96.05	94.84	95.28	97.16	95.68	92.29	95.69	95.43	93.09	94.17	98.60	97.38	96.10	94.89	97.28	94.71	97.42	97.75	95.37	96.20	96.06	96.60	96.61	95.88	96.78	96.56	97.09
F28	98.78	96.96	96.60	96.69	96.22	97.00	96.20	93.41	94.25	87.47	91.96	97.19	92.29	98.03	90.41	0	85.51	87.55	92.80	96.32	94.32	95.43	95.92	93.92	94.82	97.39	96.30	91.46	96.06	95.60	92.72	94.68	97.20	96.60	96.38	94.57	97.14	95.08	96.68	97.68	95.75	96.25	96.05	96.48	96.22	96.53	97.09	96.20	97.28
F30	98.37	97.13	96.94	95.31	96.08	96.50	96.36	93.20	94.08	86.94	93.40	96.93	91.93	97.56	89.61	0	86.44	85.30	94.36	95.86	94.65	96.35	95.40	93.74	94.82	96.22	96.30	90.89	96.01	95.65	92.72	94.80	97.90	97.47	95.61	94.73	97.05	94.71	96.31	98.26	96.14	96.30	95.74	96.77	96.71	96.78	97.55	96.38	97.09
F32	97.97	97.13	97.79	97.08	94.82	98.17	96.53	92.46	94.20	88.30	94.62	96.81	92.77	98.26	91.07	0	86.40	84.80	94.24	96.32	94.87	95.96	95.79	94.49	95.13	95.98	95.27	91.77	96.24	95.49	92.22	94.55	98.46	96.31	96.05	94.45	96.96	94.61	98.89	97.82	96.61	96.40	95.45	96.65	96.12	96.27	96.40	96.56	96.90
F38	98.58	97.19	96.77	95.71	96.34	97.17	96.14	93.04	93.56	86.35	91.98	95.15	90.97	98.03	89.92	0	86.19	87.67	92.09	96.32	94.65	95.56	96.05	93.92	94.98	97.87	96.30	93.22	96.06	95.21	93.21	94.04	96.92	96.99	96.54	94.65	97.18	95.26	97.74	97.53	95.75	96.30	96.05	96.30	96.32	96.65	97.32	95.47	97.28
F51	98.58	97.02	96.94	96.09	94.94	96.83	95.60	92.87	94.83	86.33	91.74	97.45	91.20	97.79	89.81	0	86.34	85.44	91.81	96.32	94.65	95.89	95.99	94.66	95.13	96.22	96.30	91.94	95.97	95.43	93.58	95.06	98.32	96.89	96.16	94.65	97.37	94.61	97.79	97.53	95.11	95.90	95.76	96.54	96.41	96.53	96.93	96.56	96.53
F55	97.76	97.08	96.43	95.91	94.79	97.00	95.73	93.26	93.66	87.90	93.15	96.04	91.81	97.68	90.70	0	0	85.77	93.02	96.78	94.65	96.22	95.60	94.85	94.82	97.40	95.88	91.82	96.06	95.49	93.33	94.55	98.18	96.79	96.38	94.73	97.23	95.36	98.89	97.46	94.72	96.20	95.14	96.54	96.22	95.88	97.24	96.20	96.90
F57	98.17	97.49	97.45	95.91	95.57	96.83	96.11	92.96	94.20	87.35	93.65	96.68	91.11	97.91	89.81	0	84.12	85.69	94.13	96.78	94.54	95.89	95.79	95.22	95.13	96.45	96.09	92.59	95.73	95.54	93.09	95.06	97.90	96.89	96.49	94.57	96.82	95.26	97.05	98.04	94.85	95.85	95.74	96.24	96.12	96.27	97.32	96.01	97.46
F63	98.58	97.13	96.60	96.48	95.46	97.33	96.11	92.81	93.38	87.93	93.54	97.96	92.12	97.44	89.57	0	85.33	85.76	91.84	96.55	94.87	95.63	95.60	93.92	95.59	96.93	95.68	95.43	95.55	95.87	93.21	94.80	97.90	96.50	96.10	94.69	97.05	95.17	96.68	97.46	96.01	96.30	96.66	96.42	96.80	96.53	96.78	97.10	96.71
F67	98.37	97.02	96.43	96.30	95.59	97.00	96.53	93.45	94.20	87.07	93.69	96.04	92.10	97.33	89.29	0	85.95	85.96	96.44	95.86	94.10	96.41	96.12	94.66	94.82	96.92	96.50	91.95	95.97	95.38	92.22	95.18	97.90	96.99	96.32	94.53	97.50	94.80	96.31	97.97	95.50	96.00	96.05	96.65	97.19	96.65	96.87	96.38	96.81
F70	98.58	97.08	96.43	96.09	96.76	96.67	95.98	92.59	94.08	0	93.04	95.40	91.53	97.91	89.94	0	86.19	85.22	93.80	96.09	94.76	95.96	95.66	93.92	94.98	96.22	96.50	91.42	95.83	95.16	92.59	94.80	97.62	96.89	95.61	94.97	96.96	95.08	94.83	97.60	95.24	95.76	96.35	96.60	96.12	96.65	96.78	97.64	96.43
F72	98.98	97.37	96.60	96.10	95.34	97.33	95.85	92.77	94.01	88.46	91.20	96.81	90.86	97.68	89.52	0	0	86.35	92.69	97.70	94.98	95.89	95.79	95.03	94.82	96.93	96.09	91.57	96.01	95.65	92.47	95.06	98.04	96.79	95.72	94.81	97.28	95.36	97.37	97.68	95.11	96.25	96.67	96.42	95.93	96.27	96.70	95.29	96.62
F75	98.17	96.84	96.94	95.71	96.08	97.17	96.11	93.68	94.36	88.21	92.75	96.93	92.17	97.68	89.98	0	85.13	84.03	93.02	96.09	94.43	95.37	95.99	94.29	94.22	96.93	95.68	93.86	95.83	95.43	92.35	94.04	98.18	96.31	96.49	95.09	96.82	94.71	97.42	97.75	95.62	95.71	96.05	96.30	96.71	95.37	96.70	95.83	96.90
F78	98.17	97.37	97.28	96.10	95.33	97.67	96.27	93.33	94.08	87.20	93.17	95.27	90.61	97.21	89.69	0	85.03	83.49	92.14	96.09	94.32	96.09	95.92	93.74	94.52	95.98	96.09	92.49	95.83	95.49	92.84	94.42	98.32	97.47	95.66	94.73	96.96	94.52	96.99	97.75	95.62	96.15	95.45	96.13	96.32	96.78	97.39	96.20	96.71
F90	98.58	97.31	96.26	95.91	94.95	96.83	96.11	92.83	94.15	86.77	92.17	95.68	91.87	97.33	89.51	0	86.54	84.42	91.47	96.09	94.10	96.22	95.79	94.66	94.82	96.92	96.50	92.45	95.92	95.87	92.22	95.18	98.32	96.99	96.49	94.45	97.32	94.99	96.68	98.04	95.50	96.00	96.05	96.65	96.51	95.50	97.09	96.92	96.62
F94	98.58	97.31	96.43	95.32	95.95	97.00	96.84	92.32	94.20	87.71	93.55	96.42	92.69	97.44	89.90	0	86.74	85.19	92.36	96.55	94.43	95.89	95.79	95.03	95.13	96.45	96.09	91.88	96.24	95.60	92.59	94.80	98.32	96.79	95.83	95.05	96.82	95.45	96.31	97.68	95.11	96.15	95.76	96.71	96.22	95.50	96.93	96.92	97.09
G27	98.77	97.60	96.94	98.25	95.82	98.67	96.36	96.27	96.00	87.52	90.72	96.68	95.48	96.64	92.91	94.45	92.74	93.12	96.68	95.40	97.84	97.06	96.38	95.40	92.13	97.41	97.12	92.23	96.34	96.53	94.20	95.18	97.76	97.57	96.87	95.62	96.96	94.99	97.79	97.24	96.22	96.00	96.67	97.54	97.48	96.91	97.70	97.10	97.56
G272	99.19	97.08	96.60	96.88	96.60	97.17	95.68	92.94	93.89	87.96	91.17	98.08	91.77	97.56	90.26	85.82	87.68	87.61	94.13	97.01	94.65	96.28	95.53	95.21	96.35	96.22	96.09	93.26	96.38	95.65	92.96	94.42	97.90	96.89	95.83	95.05	97.55	94.15	97.79	97.82	95.37	95.80	96.06	96.36	95.83	96.65	97.55	96.36	97.93
Gambia94/24	97.76	96.84	96.09	97.47	95.07	96.00	92.09	93.32	93.89	86.71	89.81	94.38	89.91	96.17	89.36	0	92.74	90.10	94.80	95.17	94.39	97.72	97.48	94.66	93.30	95.02	95.88	97.03	97.59	97.85	98.77	97.72	97.06	96.31	96.27	95.42	95.87	97.68	99.27	94.84	95.44	94.78	95.14	95.07	96.12	96.65	97.78	96.74	97.18
HE101/09	97.76	97.13	96.09	98.05	95.27	96.67	93.23	93.99	93.89	87.15	89.28	94.51	92.86	95.94	89.35	92.01	92.25	91.81	95.35	95.17	95.42	98.24	97.99	93.94	91.93	95.73	96.30	95.66	97.73	97.08	96.67	97.21	97.62	97.28	95.72	95.84	96.01	97.76	99.27	95.50	94.66	95.36	94.53	95.42	95.93	96.78	97.85	96.92	97.00
HE132/09	97.76	97.13	96.09	98.05	95.27	96.67	93.23	93.99	93.89	87.15	89.28	94.51	92.86	95.94	89.26	92.01	92.18	91.73	95.46	95.17	95.42	98.24	97.99	93.94	91.93	95.73	96.30	95.66	97.73	97.08	96.67	97.21	97.62	97.28	95.72	95.84	96.01	97.76	99.27	95.50	94.66	95.36	94.53	95.42	95.93	96.78	97.85	96.92	97.00
HE134/09	97.76	97.13	96.09	98.05	95.27	96.67	93.23	93.99	93.89	87.15	89.28	94.51	92.86	95.94	89.35	92.01	92.18	91.81	95.57	95.17	95.42	98.24	97.99	93.94	91.93	95.73	96.30	95.66	97.73	97.08	96.67	97.21	97.62	97.28	95.72	95.84	96.01	97.76	99.27	95.50	94.66	95.36	94.53	95.42	95.93	96.78	97.85	96.92	97.00
HE136/09	97.76	97.13	96.09	98.05	95.27	96.67	93.23	93.99	93.89	87.15	89.28	94.51	92.86	95.94	89.35	92.01	92.18	91.81	95.68	95.17	95.42	98.24	97.99	93.94	91.93	95.73	96.30	95.66	97.73	97.08	96.67	97.21	97.62	97.28	95.72	95.84	96.01	97.76	99.27	95.50	94.66	95.36	94.53	95.42	95.93	96.78	97.85	96.92	97.00
HE141/09	97.76	97.13	96.09	98.05	95.27	96.67	93.23	93.99	93.89	87.15	89.28	94.51	92.86	95.94	89.31	92.01	92.18	91.81	95.57	95.17	95.42	98.24	97.99	93.94	91.93	95.73	96.30	95.66	97.73	97.08	96.67	97.21	97.62	97.28	95.72	95.84	96.01	97.76	99.27	95.50	94.66	95.36	94.53	95.42	95.93	96.78	97.85	96.92	97.00
HE142/09	97.76	97.13	96.09	98.05	95.27	96.67	93.23	93.99	93.89	87.15	89.28	94.51	92.86	95.94	89.35	92.01	92.18	91.81	95.57	95.17	95.42	98.24	97.99	93.94	91.93	95.73	96.30	95.66	97.73	97.08	96.67	97.21	97.62	97.28	95.72	95.84	96.01	97.76	99.27	95.50	94.66	95.36	94.53	95.42	95.93	96.78	97.85	96.92	97.00
HE143/09	97.76	97.13	96.09	98.05	95.27	96.67	93.23	93.99	93.89	87.15	89.28	94.51	92.86	95.94	89.25	92.01	92.18	91.81	95.46	95.17	95.42	98.24	97.99	93.94	91.93	95.73	96.30	95.66	97.73	97.08	96.67	97.21	97.62	97.28	95.72	95.84	96.01	97.76	99.27	95.50	94.66	95.36	94.53	95.42	95.93	96.78	97.85	96.92	97.00
HE147/09	97.76	97.13	96.09	98.05	95.27	96.67	93.23	93.99	93.89	87.15	89.28	94.51	92.86	95.94	89.35	91.22	92.18	91.81	95.35	95.17	95.42	98.24	97.99	93.94	91.93	95.73	96.30	95.66	97.73	97.08	96.67	97.21	97.62	97.28	95.72	95.84	96.01	97.76	99.27	95.50	94.66	95.36	94.53	95.42	95.93	96.78	97.85	96.92	97.00
HE170/09	97.76	97.13	96.09	98.05	95.27	96.67	93.23	93.99	93.89	87.15	89.28	94.51	92.86	95.94	89.35	92.01	92.18	91.81	95.57	95.17	95.42	98.24	97.99	93.94	91.93	95.73	96.30	95.66	97.73	97.08	96.67	97.21	97.62	97.28	95.72	95.84	96.01	97.76	99.27	95.50	94.66	95.36	94.53	95.42	95.93	96.78	97.85	96.92	97.00
HE171/09	97.76	97.13	96.09	98.05	95.27	96.67	93.23	93.99	93.89	87.15	89.28	94.51	92.86	95.94	89.16	92.01	92.18	91.81	95.57	95.17	95.42	98.24	97.99	93.94	91.93	95.73	96.30	95.66	97.73	97.08	96.67	97.21	97.62	97.28	95.72	95.84	96.01	97.76	99.27	95.50	94.66	95.36	94.53	95.42	95.93	96.78	97.85	96.92	97.00
HE178/09	97.76	97.13	96.09	98.05	95.27	96.67	93.23	93.99	93.89	87.15	89.28	94.51	92.86	95.94	89.26	92.01	92.18	91.81	95.35	95.17	95.42	98.24	97.99	93.94	91.93	95.73	96.30	95.66	97.73	97.08	96.67	97.21	97.62	97.28	95.72	95.84	96.01	97.76	99.27	95.50	94.66	95.36	94.53	95.42	95.93	96.78	97.85	96.92	97.00
HE93/10_v1	97.76	97.13	96.09	98.05	95.27	96.67	93.23	93.99	93.89	87.15	89.28	94.51	92.86	95.94	89.35	92.01	92.18	91.81	95.46	95.17	95.42	98.24	97.99	93.94	91.93	95.73	96.30	95.66	97.73	97.08	96.67	97.21	97.62	97.28	95.72	95.84	96.01	97.76	99.27	95.50	94.66	95.36	94.53	95.42	95.93	96.78	97.85	96.92	97.00
Hp238	97.96	98.01	97.11	95.70	97.25	98.00	96.36	93.26	93.67	87.32	90.57	97.19	90.72	97.10	85.18	0	85.27	85.52	93.47	96.78	93.89	96.54	96.18	93.92	95.28	97.16	96.30	92.02	95.87	95.27	92.35	94.80	97.76	96.89	96.32	94.57	97.37	95.26	97.79	97.53	96.01	95.71	96.35	96.13	96.90	96.14	96.86	96.74	97.09
HPAG1	98.58	97.37	98.13	97.47	97.50	97.67	95.48	96.02	96.73	90.22	90.90	97.32	91.96	97.68	93.81	95.02	90.50	92.59	95.58	95.86	96.32	96.35	96.05	95.95	93.31	97.16	96.30	92.36	96.52	96.48	94.44	94.93	97.62	96.31	97.03	96.50	96.87	95.73	97.79	96.66	96.09	96.30	97.27	97.42	97.48	97.04	97.39	98.01	98.03
HPJP26	97.76	97.19	96.43	96.10	96.60	97.17	95.73	93.96	94.03	87.81	92.69	97.19	91.11	96.05	89.68	0	85.95	82.74	93.36	96.32	94.87	95.89	95.86	95.03	94.52	96.69	94.65	92.53	96.01	95.65	92.72	94.68	97.76	96.31	95.55	94.53	96.96	94.99	97.37	97.46	95.11	96.50	95.74	96.42	96.03	96.65	97.09	96.20	96.71
HUP-B14	98.98	98.01	96.60	98.05	95.95	96.67	94.24	96.02	96.48	88.23	93.08	96.04	94.34	97.56	92.31	0	90.21	91.62	94.49	94.71	96.24	96.41	96.50	93.38	93.91	96.93	96.30	94.56	96.52	96.48	95.68	96.45	98.04	96.60	96.10	95.62	96.82	95.55	97.42	96.66	95.70	95.46	96.67	95.77	96.80	96.65	97.55	96.20	97.46
India7	98.17	97.43	97.62	96.69	95.95	98.00	96.36	96.09	95.38	86.97	93.01	96.93	91.50	96.52	94.45	0	0	86.77	95.57	97.70	95.63	95.96	95.60	94.10	94.52	96.92	95.47	93.11	96.48	96.09	94.57	94.93	97.89	96.40	97.03	95.21	97.19	95.26	96.68	97.82	96.22	96.64	96.97	97.07	96.22	96.53	96.93	96.92	97.28
J166	99.59	97.89	97.28	97.47	96.60	96.50	95.85	94.88	95.02	87.79	91.04	97.06	93.09	97.21	92.30	0	95.38	93.12	94.91	95.40	96.97	97.65	96.31	94.48	94.82	99.53	99.59	93.03	96.62	96.64	95.80	95.69	97.62	97.47	96.16	96.74	97.32	95.36	98.15	96.30	96.48	96.20	98.78	96.95	96.32	96.28	97.62	97.28	98.12
J99	97.56	97.08	96.26	98.05	94.94	97.83	95.49	96.87	94.90	87.46	89.91	95.27	92.89	96.52	93.71	94.44	0	91.84	95.24	97.01	94.81	97.52	97.15	93.75	92.09	95.04	95.47	97.68	97.17	97.47	97.41	97.59	97.20	96.79	96.21	95.48	95.87	97.21	99.27	94.84	94.79	95.02	96.35	95.25	95.25	96.65	97.24	97.46	97.09
K26A1	96.75	94.86	93.71	92.25	89.69	94.83	90.80	90.11	91.64	0	0	91.06	86.87	94.08	86.74	0	87.98	0	91.25	93.56	0	94.40	93.40	92.27	88.32	93.14	93.00	91.67	94.39	93.51	94.44	94.17	94.50	92.23	94.56	91.28	93.73	92.57	95.57	93.55	90.10	92.45	93.90	93.03	93.02	92.54	94.25	92.93	94.37
L7	99.19	97.72	95.92	96.10	96.21	99.50	95.73	95.05	95.97	0	0	96.81	91.98	96.98	87.01	0	0	85.84	95.24	98.16	96.75	96.15	95.47	95.40	95.59	97.40	96.71	92.77	96.71	96.04	92.59	94.42	97.48	96.11	96.98	95.01	97.50	95.26	98.89	97.46	95.37	96.50	96.66	96.54	97.48	96.40	96.93	97.10	98.12
Lithuania75	99.39	98.13	97.28	97.27	95.82	97.67	96.27	97.24	95.76	88.36	91.28	96.42	91.40	96.86	92.68	94.37	91.70	90.62	96.01	97.24	96.32	96.41	95.92	95.95	93.91	96.22	95.47	94.41	96.48	95.98	94.44	94.68	97.90	97.57	96.05	95.70	96.96	96.38	97.79	96.88	95.57	96.00	96.97	96.89	97.48	97.68	97.62	97.28	97.93
MKF10	98.17	97.31	97.45	96.10	95.31	97.67	95.35	93.01	94.40	86.94	93.06	97.83	91.23	97.56	90.60	0	86.30	86.11	93.13	96.32	94.54	96.22	95.60	94.66	94.52	96.22	96.30	95.19	95.64	95.43	93.58	94.30	98.46	96.99	95.99	94.73	96.87	94.52	96.68	97.75	95.50	96.20	95.74	96.48	96.22	96.01	96.93	96.20	97.28
MKF3	98.78	97.08	96.43	95.91	96.08	97.83	96.02	92.84	94.64	88.81	91.69	97.45	93.42	97.68	90.36	0	85.12	84.17	92.80	96.55	94.76	95.89	95.73	94.48	95.13	97.16	95.88	91.93	95.97	95.49	92.96	94.17	97.62	97.38	96.21	94.49	97.14	94.89	97.05	97.82	95.37	96.10	95.45	96.42	96.32	96.91	96.93	96.92	97.00
MKF8	98.17	97.19	96.94	96.30	95.72	96.67	95.98	92.72	94.06	86.88	92.83	95.15	91.62	97.56	89.67	0	86.03	87.80	92.91	96.09	93.89	95.83	95.66	93.74	95.13	96.93	95.27	91.97	95.87	95.65	93.21	93.92	97.48	96.79	95.88	94.73	97.14	95.36	96.68	97.39	95.88	96.50	96.66	96.19	96.90	95.88	96.93	96.92	96.15
MKM1	98.17	97.13	96.77	95.51	95.46	96.83	95.73	93.32	94.27	86.61	93.68	95.66	90.95	97.79	89.71	0	86.90	85.97	93.24	96.09	94.81	95.89	95.92	94.48	94.67	97.64	95.06	91.98	95.22	95.65	92.84	94.93	97.76	96.21	96.05	94.65	97.00	94.52	94.83	97.89	95.62	95.36	95.74	96.19	96.51	97.17	96.78	96.56	96.81
MKM5	98.58	97.25	96.77	96.10	96.08	96.50	95.85	92.32	93.32	87.15	92.27	97.83	90.95	97.56	88.83	0	86.45	85.62	93.58	97.24	94.98	95.96	95.99	94.84	94.98	97.87	95.47	91.78	96.24	95.49	92.96	94.93	98.46	96.50	95.77	94.81	96.87	94.61	97.05	97.82	95.62	96.40	96.06	96.42	96.32	95.88	96.93	96.56	97.37
MKM6	97.97	97.37	96.09	96.30	95.05	96.83	95.48	93.22	94.21	87.56	91.88	95.40	91.62	98.49	89.76	0	86.98	85.52	92.25	96.32	95.20	96.02	95.86	95.03	96.04	97.40	95.68	93.52	96.15	95.54	93.21	94.30	98.32	97.28	95.77	94.77	96.91	94.89	96.98	97.89	95.62	96.25	96.01	96.42	96.12	96.78	97.55	96.38	97.00
ML1	98.58	97.43	96.60	95.52	96.60	97.33	95.73	93.26	93.77	86.56	79.71	96.68	91.75	97.68	90.21	0	84.63	85.76	94.68	96.78	94.00	94.72	95.66	93.92	94.98	96.93	96.71	95.55	96.06	95.60	92.22	94.17	97.62	96.89	95.72	94.93	97.05	95.08	96.31	97.60	95.24	95.56	95.44	96.24	96.41	96.65	96.63	97.10	96.90
ML2	98.37	97.37	97.11	96.69	96.98	97.67	96.48	93.15	94.27	87.98	84.06	97.32	91.47	97.56	90.05	0	83.92	85.09	93.58	96.78	93.89	95.30	96.31	93.74	94.52	96.69	96.50	94.25	95.92	95.71	92.84	94.04	97.76	96.89	95.61	94.77	96.91	94.61	96.99	97.68	96.27	95.80	95.74	96.24	96.32	96.53	97.24	96.56	97.09
ML3	98.17	97.13	97.28	96.30	94.56	97.50	95.86	93.26	94.15	87.11	91.19	96.42	90.78	97.91	90.60	0	87.44	86.82	93.02	96.78	94.21	95.50	95.79	94.66	94.22	97.40	95.06	94.62	95.92	95.93	92.72	94.30	98.04	97.08	96.27	94.65	97.09	94.61	97.42	97.24	95.75	95.76	96.05	96.24	96.12	96.91	97.01	96.74	97.00
NY40	99.19	97.54	96.94	98.83	96.60	97.67	93.59	93.03	93.70	87.59	90.28	96.42	92.25	96.75	91.56	0	0	88.87	96.12	95.63	94.91	96.93	96.25	96.69	94.82	97.17	96.50	95.89	96.62	96.20	96.30	95.31	96.92	97.08	96.21	96.94	96.55	94.34	96.68	97.17	96.14	95.76	96.05	96.24	96.03	96.28	97.70	96.38	98.12
OK113	98.58	97.43	96.60	96.10	96.21	98.33	96.11	93.45	94.14	88.96	92.86	97.70	92.83	96.75	90.33	0	83.85	84.02	94.57	96.09	94.43	95.76	96.44	94.11	94.67	96.93	95.88	92.48	96.34	95.60	92.72	94.42	97.90	96.79	97.04	94.90	97.09	96.10	96.60	97.75	95.11	95.85	95.76	96.60	96.51	95.88	97.16	96.20	97.46
OK310	97.36	97.25	96.77	95.52	95.57	96.67	95.73	93.09	93.91	87.59	80.58	97.70	91.21	97.44	90.85	0	86.11	85.51	94.02	96.09	94.87	95.56	95.92	94.11	94.82	96.69	95.88	92.24	95.78	95.38	93.09	95.06	97.34	96.79	96.10	94.49	97.00	94.71	97.37	97.60	95.75	96.15	95.74	96.24	96.61	95.75	96.93	96.38	97.28
oki102	99.19	97.13	97.79	97.08	96.47	96.83	93.23	93.71	94.58	87.52	0	96.93	92.33	97.22	90.30	0	0	91.61	94.13	95.40	95.51	96.54	96.57	96.13	96.04	97.40	96.09	92.25	96.48	96.48	94.20	94.30	96.92	97.47	96.93	95.86	97.09	96.38	98.15	97.82	95.88	96.20	96.36	96.71	96.71	96.65	97.70	97.46	97.09
oki112	98.78	97.72	97.45	97.08	96.47	96.83	93.23	93.58	94.65	89.80	0	97.06	92.44	97.22	91.23	0	86.37	83.74	0	95.40	95.51	96.48	96.76	94.29	94.67	97.40	96.09	92.69	96.85	96.37	95.43	94.30	98.04	97.28	96.93	95.82	97.09	96.19	98.15	98.18	96.01	96.40	95.15	96.65	96.61	96.65	97.70	97.64	97.00
oki128	98.78	97.37	96.60	95.90	96.33	97.00	95.73	92.32	94.45	87.00	93.40	97.32	92.52	97.33	90.50	0	0	84.62	0	95.86	94.44	96.02	95.53	93.74	95.74	96.22	95.88	95.07	95.64	95.21	93.21	95.44	97.62	96.60	96.21	94.53	97.55	95.91	96.24	97.68	94.98	96.30	96.05	96.30	96.32	96.27	96.78	96.74	97.37
oki154	98.78	97.54	96.94	94.92	95.67	96.67	96.61	93.64	94.90	87.44	93.02	97.19	0	97.21	91.04	0	87.63	87.07	93.58	97.01	0	95.76	96.37	95.03	94.67	96.93	95.27	92.83	95.64	95.60	92.35	94.80	97.90	97.28	95.83	94.89	97.28	95.64	96.24	97.82	94.85	96.35	96.05	96.54	96.80	95.88	97.24	96.74	97.08
oki422	98.37	97.78	97.79	97.27	96.47	96.83	93.23	93.65	95.12	88.15	95.52	97.45	92.08	97.22	92.19	0	91.74	0	0	95.40	95.51	95.89	96.76	96.13	94.82	97.40	96.09	93.55	96.85	95.60	95.43	94.30	97.06	97.28	96.82	95.86	97.14	96.38	98.15	97.31	96.74	96.25	96.36	96.71	96.51	96.65	97.78	97.28	98.40
oki673	98.78	97.60	96.77	94.92	95.54	96.33	96.48	93.38	94.01	87.22	0	97.06	91.61	97.21	91.04	0	86.86	86.54	93.58	95.86	0	95.83	96.44	94.49	94.52	97.40	95.88	93.26	95.32	95.54	92.47	94.80	97.48	96.89	96.10	94.21	97.37	95.64	95.86	97.82	94.85	96.35	95.74	96.54	96.61	95.50	96.86	95.65	97.08
oki828	98.58	97.31	96.60	95.31	95.67	96.67	96.48	93.45	94.52	88.59	0	97.19	0	97.21	91.14	0	86.62	85.87	0	97.01	95.20	95.83	95.53	93.92	94.52	97.16	95.68	95.19	95.32	95.32	92.35	94.80	97.76	97.28	96.10	94.85	97.23	95.36	96.24	97.82	94.72	96.45	96.05	96.54	96.80	95.88	97.85	96.74	97.08
oki898	98.17	97.08	97.79	97.08	96.34	96.83	93.11	93.64	95.29	89.44	93.01	96.93	92.35	97.22	0	0	90.94	93.36	0	95.17	95.41	96.54	96.70	96.13	94.82	97.40	96.09	92.59	96.89	96.20	95.43	94.17	96.92	97.28	96.93	95.86	97.05	95.08	98.15	97.39	97.53	95.90	96.36	96.60	96.61	96.65	97.24	96.92	98.40
P12	99.39	97.89	98.13	96.88	95.82	98.00	94.72	96.98	96.30	88.45	91.66	96.93	95.76	96.75	0	100.00	91.87	91.49	96.12	95.63	96.72	95.69	96.89	94.84	94.07	98.58	96.71	94.27	96.75	96.15	94.57	95.18	97.90	95.92	96.43	96.34	97.37	94.99	97.79	96.44	97.01	95.90	97.27	96.36	97.48	96.65	98.01	96.01	98.31
PeCan18	97.97	97.19	97.79	97.66	94.29	95.67	93.34	95.71	94.54	88.80	89.16	95.40	91.30	95.82	91.57	93.49	93.63	92.27	94.68	95.63	95.56	96.41	97.15	94.29	95.43	97.16	96.50	95.57	96.29	97.25	98.64	98.61	98.04	96.99	96.21	95.86	95.87	97.21	99.63	96.59	95.96	95.95	95.15	95.48	95.93	97.17	97.32	96.92	98.31
PeCan4	98.98	97.08	97.62	97.27	96.08	96.67	94.24	92.20	95.23	88.75	93.01	96.93	91.37	97.10	91.72	93.03	91.15	0	95.02	97.47	96.00	96.35	96.25	93.00	95.28	95.74	96.09	96.08	95.97	96.04	93.58	94.17	98.46	97.18	96.38	95.78	96.91	94.61	97.37	96.73	95.62	95.86	96.36	96.83	96.80	96.67	97.01	96.19	97.75
PMSS1	98.58	97.37	97.62	97.66	97.39	96.00	92.34	95.90	95.57	92.60	90.30	0	94.29	96.87	0	81.43	92.96	92.60	94.91	95.63	96.55	95.69	96.25	95.76	95.28	97.64	96.71	96.83	96.71	96.53	95.43	96.58	97.48	97.18	96.54	96.42	96.96	94.52	98.52	96.73	97.14	96.00	97.58	96.42	96.71	96.03	97.78	97.64	97.84
PNG84A	96.95	97.25	96.60	95.32	94.83	96.00	93.97	93.40	93.26	87.14	0	95.91	91.05	95.82	89.42	0	0	85.20	93.58	96.55	95.74	95.37	95.66	93.74	95.13	96.93	94.86	95.30	96.20	95.93	92.72	95.69	97.33	96.21	95.99	94.37	96.96	95.26	96.68	96.88	94.92	96.20	94.24	96.71	96.51	96.14	96.63	95.47	97.28
Puno120	98.37	97.72	97.45	95.91	95.93	97.33	96.48	92.91	95.11	90.52	93.20	96.17	90.72	96.75	90.98	0	88.15	86.70	94.46	96.78	95.20	95.56	95.47	94.29	95.13	96.45	95.88	91.78	96.11	95.98	93.21	94.68	98.46	96.70	95.88	95.09	97.23	94.71	96.99	98.11	95.50	96.10	95.74	96.13	96.41	96.78	96.86	97.64	97.56
Puno135	98.17	97.54	96.77	95.32	96.85	97.00	96.73	92.26	94.21	87.44	90.77	96.93	92.18	96.86	90.10	0	86.53	86.30	93.47	97.01	95.31	96.09	95.02	93.92	95.13	96.93	95.88	94.16	96.43	95.65	92.59	94.68	97.62	96.21	96.21	94.97	97.00	95.17	96.99	97.89	95.50	96.50	95.74	96.30	96.32	96.78	97.47	96.74	97.46
Rif1	100.00	100.00	100.00	100.00	100.00	100.00	100.00	96.41	97.55	88.38	93.15	96.93	92.68	97.33	93.06	90.22	0	89.36	95.14	100.00	100.00	96.61	96.44	100.00	100.00	100.00	100.00	95.37	96.43	96.04	93.70	94.68	100.00	100.00	100.00	100.00	100.00	95.64	97.05	100.00	100.00	100.00	100.00	100.00	100.00	100.00	100.00	100.00	100.00
Rif2	100.00	100.00	100.00	100.00	100.00	100.00	100.00	96.41	97.55	88.38	93.15	96.93	92.68	97.33	93.06	90.22	0	89.36	95.14	100.00	100.00	96.61	96.44	100.00	100.00	100.00	100.00	95.37	96.43	96.04	93.70	94.68	100.00	99.90	100.00	100.00	100.00	95.64	97.05	100.00	100.00	100.00	100.00	100.00	100.00	100.00	100.00	100.00	100.00
Sat464	98.37	96.96	97.28	96.10	95.67	97.33	96.60	93.22	94.01	88.57	93.74	97.06	0	97.21	89.73	0	86.91	85.45	94.02	95.86	95.78	95.76	95.92	94.29	95.59	96.45	95.88	91.72	95.87	95.98	92.72	94.42	98.32	96.89	96.49	95.45	97.32	94.80	97.74	97.82	95.50	96.30	95.14	96.54	96.51	96.91	96.86	97.46	97.75
Shi112	98.17	96.96	97.45	95.71	96.33	97.67	95.73	93.38	93.77	89.17	0	96.81	89.19	96.40	90.68	0	87.21	86.04	93.91	96.55	95.01	95.69	95.99	94.48	95.43	96.22	96.50	92.73	96.06	96.15	93.09	95.06	98.18	96.99	96.21	95.13	97.41	95.08	97.37	97.97	95.75	96.64	95.44	96.48	96.71	96.91	97.09	97.28	97.93
Shi169	97.97	97.19	97.79	95.71	96.33	97.33	95.85	93.32	93.64	89.75	0	97.45	0	96.75	90.39	0	84.51	85.84	93.47	96.55	94.70	95.30	96.12	94.29	94.98	96.45	96.50	91.81	95.97	95.93	93.46	94.42	98.04	96.99	96.38	95.17	97.28	95.54	97.37	98.11	95.75	96.40	95.74	96.36	96.90	97.04	97.24	97.28	97.93
Shi417	98.17	97.13	97.79	95.52	96.19	97.00	96.47	92.71	93.40	88.26	93.45	97.06	0	96.98	90.25	0	85.76	83.83	93.56	96.55	95.79	95.50	96.18	93.92	95.28	96.69	95.88	92.28	95.69	95.65	93.46	95.44	97.62	96.89	96.16	95.42	97.14	94.99	97.37	98.11	95.75	96.35	95.44	96.48	96.80	97.17	97.39	97.28	97.75
Shi470	98.17	97.02	97.28	96.10	96.59	97.17	96.23	93.83	93.71	89.74	93.45	97.19	90.19	96.86	90.25	0	86.54	85.80	93.69	96.55	95.57	95.69	95.79	94.11	95.59	96.45	96.50	92.49	95.87	95.87	92.96	94.42	97.90	96.99	96.60	95.42	97.14	0	97.37	97.82	95.62	96.05	96.35	96.60	97.00	96.91	97.24	95.83	97.93
SJM180	98.58	97.60	97.11	96.69	97.91	97.17	92.84	92.74	94.63	89.29	91.02	95.91	91.27	97.21	91.99	94.01	89.26	93.32	95.03	94.71	96.97	96.28	97.34	94.29	93.76	96.69	96.30	93.89	96.99	96.42	94.69	97.72	98.04	96.99	96.32	95.86	96.50	95.91	97.42	97.02	96.22	95.80	97.88	96.60	96.90	97.18	97.78	96.38	97.75
SNT49	98.98	97.43	97.28	96.30	96.34	98.17	96.11	95.90	96.04	87.05	91.13	96.93	92.42	96.75	90.54	90.07	0	85.19	94.57	95.86	95.68	96.09	95.66	95.20	96.50	97.40	96.30	93.83	96.52	95.60	94.07	96.58	97.75	96.40	97.09	95.74	97.32	94.89	98.15	97.10	96.40	96.20	96.67	97.18	97.58	96.01	97.01	96.01	97.93
SouthAfrica20	95.73	94.16	93.03	92.64	89.43	94.33	90.04	90.80	91.44	83.30	77.99	91.19	93.03	94.32	86.25	0	0	88.35	89.59	93.79	91.57	94.47	93.53	92.27	88.01	94.10	92.80	92.68	94.67	93.29	92.59	94.04	94.35	91.84	94.29	91.15	94.41	92.40	95.94	93.03	90.48	92.35	93.62	92.91	93.02	92.54	93.95	93.84	94.46
SouthAfrica7	95.93	95.67	92.86	92.84	89.80	94.83	90.17	92.41	92.95	87.80	92.44	91.32	90.86	94.66	87.28	0	0	87.31	93.02	94.25	95.82	94.53	95.86	92.27	87.56	93.87	93.43	91.36	94.30	93.73	92.22	94.80	95.93	91.84	94.62	90.91	94.14	92.76	96.68	95.21	91.68	92.40	94.22	94.98	93.70	92.29	93.72	96.38	94.27
SS1	98.58	97.37	97.62	97.66	97.39	96.00	92.34	95.90	95.57	92.60	90.30	96.30	94.29	96.87	0	81.43	92.96	92.44	94.91	95.63	96.55	95.69	96.25	95.76	95.28	97.64	96.71	96.83	96.71	96.53	95.43	96.58	97.48	97.18	96.54	96.42	96.96	94.52	98.52	96.73	97.14	96.00	97.58	96.42	96.71	96.03	97.78	97.64	97.84
UM032	98.78	97.25	97.45	95.91	96.08	96.83	95.35	93.38	93.74	88.08	90.17	96.55	92.46	97.68	90.60	0	85.12	85.14	93.91	96.78	94.32	95.70	95.86	94.29	94.37	96.69	95.06	91.93	95.83	95.82	92.35	94.93	96.78	96.60	96.21	94.93	96.96	95.26	96.31	97.39	95.88	95.26	95.76	96.89	96.32	96.65	96.86	96.92	97.09
UM037	98.58	97.78	97.79	96.30	96.21	96.00	92.98	95.70	96.17	87.60	90.36	97.32	93.10	97.33	92.00	0	0	94.76	95.47	95.40	96.50	96.48	96.12	95.21	93.91	97.16	95.47	93.73	96.62	97.58	94.20	95.56	98.18	97.47	96.71	96.42	97.37	96.84	97.79	96.95	97.27	95.80	95.15	95.89	96.71	97.05	96.86	95.65	97.28
UM066	98.58	97.37	96.43	96.49	95.20	96.83	96.48	92.83	93.71	86.49	90.42	97.19	0	97.44	90.06	0	86.25	84.90	93.13	95.63	95.09	95.50	95.92	93.92	94.22	97.16	95.47	92.34	95.36	95.21	92.47	94.17	97.06	96.70	96.49	95.58	96.91	95.45	97.42	97.53	95.75	96.20	95.45	96.89	97.00	96.91	97.55	97.10	96.90
UM298	98.78	97.25	97.45	95.91	96.08	96.83	95.35	93.45	93.74	87.99	90.17	96.55	92.46	97.68	0	0	84.89	84.77	93.91	96.78	94.32	95.70	95.86	94.29	94.37	96.69	95.06	91.93	95.83	95.82	92.35	94.93	96.78	96.60	96.21	94.93	96.96	95.26	96.31	97.39	95.88	95.26	95.76	96.89	96.32	96.65	96.86	96.92	97.09
UM299	98.78	97.25	97.45	95.91	96.08	96.83	95.35	93.45	93.74	87.99	90.17	96.55	92.46	97.68	0	0	84.89	84.77	93.91	96.78	94.32	95.70	95.86	94.29	94.37	96.69	95.06	91.93	95.83	95.82	92.35	94.93	96.78	96.60	96.21	94.93	96.96	95.26	96.31	97.39	95.88	95.26	95.76	96.89	96.32	96.65	96.86	96.92	97.09
v225d	98.98	97.37	97.28	96.49	95.28	96.83	96.73	93.92	94.45	89.68	93.83	97.06	91.91	97.33	90.88	0	86.39	0	0	96.78	95.31	95.56	96.05	94.48	95.74	96.69	95.47	93.08	96.06	95.82	92.96	94.93	98.60	96.50	95.88	94.89	97.23	95.17	98.12	97.75	95.50	96.30	95.74	96.60	96.71	97.17	96.70	96.38	96.81
XZ274	97.97	97.72	96.60	96.69	95.44	97.67	95.98	93.16	94.73	87.17	91.11	97.57	91.72	96.98	86.70	0	84.47	85.44	93.69	96.78	94.76	96.41	95.79	93.72	94.67	97.16	95.27	94.18	0	95.49	93.46	95.31	97.62	97.08	96.16	94.61	97.09	0	0	97.53	95.62	96.05	95.76	96.24	96.80	96.40	97.32	97.10	97.28
[truncated: 38 more columns]
